# Supplementary material for: Gold-catalyzed Michael addition/intramolecular annulation cascade: an effective pathway for the chemoselective- and regioselective synthesis of tetracyclic indole derivatives in water
Source: Royal Society of Chemistry journal article supplement (doi:10.1039/c2gc36301a), 2012-12-17

## *Supporting Information for*

### **Gold-catalyzed Michael Addition/Intramolecular Annulation Cascade: an Effective Pathway for the Chemoselective- and Regioselective Synthesis of Tetracyclic Indole Derivatives in Water**

Shengtao Xu<sup>a,b</sup>, Yu Zhou<sup>b</sup>, Jinyi Xu<sup>a,\*</sup>, Hualiang Jiang<sup>b</sup>, and Hong Liu<sup>a,b,\*</sup>

*<sup>a</sup> Department of Medicinal Chemistry, China Pharmaceutical University, 24 Tong jia Xiang, Nanjing, 210009, P. R. China*

*<sup>b</sup> State Key Laboratory of Drug Research, Shanghai Institute of Materia Medica, Chinese Academy of Sciences, Shanghai, 201203, P. R. China*

Email: [hliu@mail.shcnc.ac.cn](mailto:hliu@mail.shcnc.ac.cn);

[jinyixu@china.com](mailto:jinyixu@china.com)

## Contents

|                                                                        |            |
|------------------------------------------------------------------------|------------|
| <b>X-ray crystallographic structure of compound 3Ba.....</b>           | <b>S3</b>  |
| <b>General Information .....</b>                                       | <b>S4</b>  |
| <b>General Procedures for the Synthesis of Starting Materials.....</b> | <b>S5</b>  |
| <b>Optimization of the Reaction Condition.....</b>                     | <b>S6</b>  |
| <b>Characterization of the Michael Addition Intermediate 8Aa.....</b>  | <b>S6</b>  |
| <b>Derivatization of Product 3Me.....</b>                              | <b>S7</b>  |
| <b>Stability Test of Au catalyst I.....</b>                            | <b>S7</b>  |
| <b>General Procedure for Synthesis of 3Aa-3Mk .....</b>                | <b>S9</b>  |
| <b>Characterization Data for Starting Materials.....</b>               | <b>S10</b> |
| <b>NMR Data.....</b>                                                   | <b>S14</b> |

## X-ray crystallographic structure of compound 3Ba

### checkCIF/PLATON report

Structure factors have been supplied for datablock(s) H\_\_Report\_20120054\_20120054.CIF

No syntax errors found. [CIF dictionary](#) [Interpreting this report](#)

### Datablock: H\_\_Report\_20120054\_20120054.CIF

---

Bond precision: C-C = 0.0016 Å Wavelength=0.71073

Cell: a=20.8671 (8) b=10.4343 (4) c=18.5300 (7)  
alpha=90 beta=101.947 (2) gamma=90  
Temperature: 100 K

|                        | Calculated    | Reported      |
|------------------------|---------------|---------------|
| Volume                 | 3947.2 (3)    | 3947.2 (3)    |
| Space group            | C 2/c         | C2/c          |
| Hall group             | -C 2yc        | ?             |
| Moiety formula         | C25 H20 N2 O2 | ?             |
| Sum formula            | C25 H20 N2 O2 | C25 H20 N2 O2 |
| Mr                     | 380.43        | 380.43        |
| Dx, g cm <sup>-3</sup> | 1.280         | 1.280         |
| Z                      | 8             | 8             |
| Mu (mm <sup>-1</sup> ) | 0.082         | 0.082         |
| F000                   | 1600.0        | 1600.0        |
| F000'                  | 1600.66       |               |
| h, k, lmax             | 27, 13, 24    | 27, 13, 24    |
| Nref                   | 4559          | 4530          |
| Tmin, Tmax             | 0.972, 0.976  | 0.679, 0.746  |
| Tmin'                  | 0.972         |               |

Correction method= MULTI-SCAN

Data completeness= 0.994 Theta(max)= 27.550

R(reflections)= 0.0383 ( 4128) wR2(reflections)= 0.1051 ( 4530)

S = 1.043 Npar= 264

---

The following ALERTS were generated. Each ALERT has the format  
**test-name\_ALERT\_alert-type\_alert-level.**  
Click on the hyperlinks for more details of the test.

---

● **Alert level C**

|                                   |                                           |          |
|-----------------------------------|-------------------------------------------|----------|
| <a href="#">PLAT240_ALERT_2_C</a> | Hirshfeld Test Diff for O2 -- N2 ..       | 5.3 su   |
| <a href="#">PLAT911_ALERT_3_C</a> | Missing # FCF Refl Between THmin & STh/L= | 0.600 3  |
| <a href="#">PLAT912_ALERT_4_C</a> | Missing # of FCF Reflections Above STh/L= | 0.600 26 |

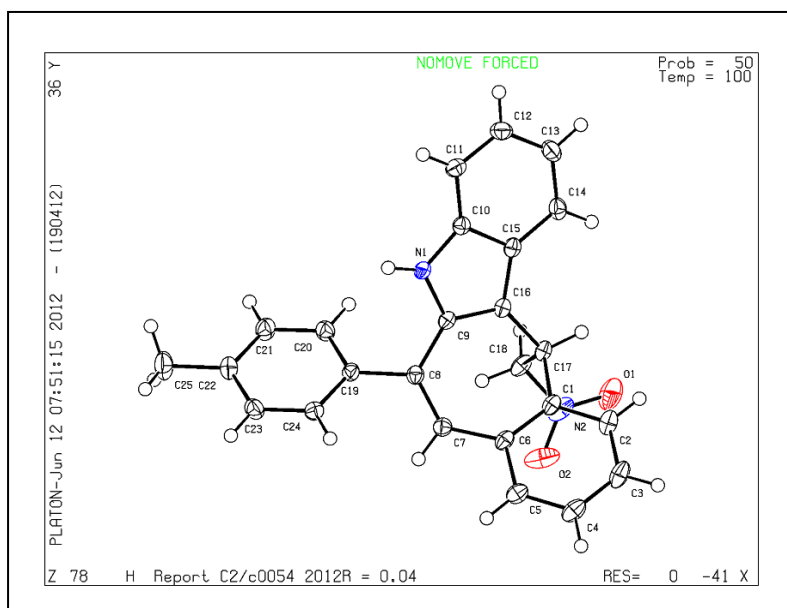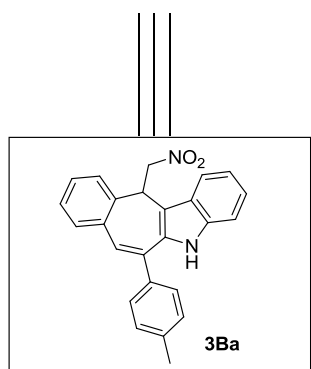

### X-ray crystallographic structure of compound 3Ba

CCDC 894928 contains the supplementary crystallographic data for this paper. These data can be also obtained free of charge from The Cambridge Crystallographic Data Centre via [www.ccdc.cam.ac.uk/data\\_request/cif](http://www.ccdc.cam.ac.uk/data_request/cif).

### General Information

Commercially available reagents and solvents were used without further purification. Column chromatography was carried out on silica gel.  $^1\text{H}$ ,  $^{13}\text{C}$ ,  $^{19}\text{F}$  and  $^{31}\text{P}$  NMR spectra were obtained on Varian Mercury-400 and/or Varian Mercury-500 spectrometers (TMS as IS). Chemical shifts were reported in parts per million (ppm,  $\delta$ ) downfield from tetramethylsilane. Proton coupling patterns are described as singlet (s), doublet (d), triplet (t), quartet (q), double doublet (dd), multipet (m) and broad (br). Low- and high-resolution mass spectra (LRMS and HRMS) were measured on

Finnigan MAT 95 spectrometer.

## General Procedures for the Synthesis of Starting Materials

### General Procedure for Synthesis of (*E*)-1-(2-nitrovinyl)-2-(phenylethynyl)

#### Benzene (**1A**)

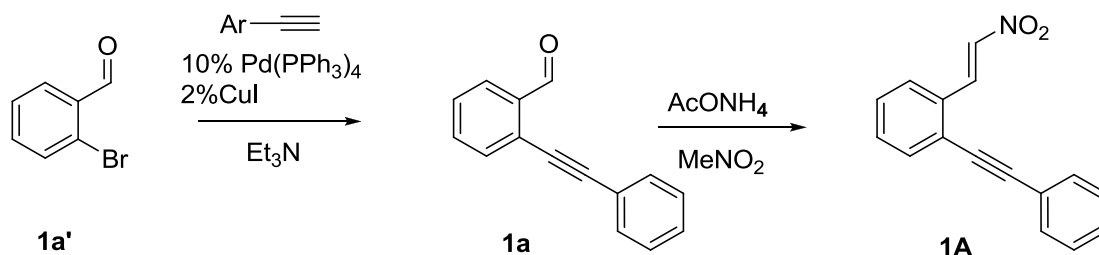

A dry round bottom flask was charged with 2-bromobenzaldehyde (5.0g, 27.0mmol, 1equiv.),  $\text{CuI}$  (0.103g, 0.54mmol, 0.02equiv.) and  $\text{Pd}(\text{PPh}_3)_4$  (3.13g, 2.7mmol, 0.1equiv.). This mixture was then subjected to three purge cycles of vacuum and argon gas. 30 mL of  $\text{Et}_3\text{N}$  and phenylacetylene (5.52g, 54.0mmol, 2equiv.) were added to the reaction mixture and allowed to stir at  $60^\circ\text{C}$  for 2h. The reaction mixture was then diluted with ether and water. The aqueous phase was extracted three times with ether. The concentrated organic phases were dried over  $\text{Na}_2\text{SO}_4$  and concentrated in vacuo. **1a** was obtained by flash column chromatography of the crude product (pure pentane) to yield a yellow liquid (5.09g, 24.68 mmol, 91%).

The titled compound **1A** was prepared according to the literature procedure<sup>1</sup>. A solution of **1a** (1g, 4.85mmol, 1equiv.) and ammonium acetate (448mg, 5.82 mmol, 1.2equiv.) in dry nitromethane (5.0 mL) was stirred at  $100^\circ\text{C}$  for 1h. After concentration, the residue was partitioned between  $\text{EtOAc}$  and water. The aqueous layer was extracted with  $\text{EtOAc}$ , and the combined organic layers were washed with water and brine, dried over  $\text{Na}_2\text{SO}_4$  and concentrated. Column chromatography ( $\text{EtOAc}$ :*n*-hexane = 1/100, v/v) to give the titled product **1A** (1.08g, 89%) as a light yellow solid.

#### Reference:

[1] A. Poschalko, S. Welzig, M. Treu, S. Nerdinger, K. Mereiter and U. Jordis, *Tetrahedron*, 2002, **58**, 1513-1518.

**Table 1S. Optimization of the reaction conditions<sup>a</sup>**

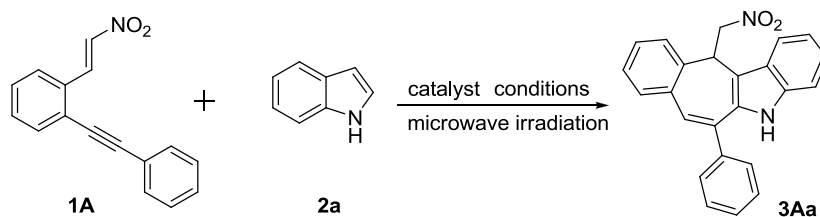

| Entry | Catalyst system   | Additive          | Solvent          | Yield (%)       |
|-------|-------------------|-------------------|------------------|-----------------|
| 1     | Au catalyst I     | DBSA <sup>b</sup> | H <sub>2</sub> O | 0               |
| 2     | AuCl              | TFA               | H <sub>2</sub> O | 43              |
| 3     | AuBr <sub>3</sub> | TFA               | H <sub>2</sub> O | 57              |
| 4     | Au catalyst I     | TFA               | H <sub>2</sub> O | 59 <sup>c</sup> |

<sup>a</sup> Reaction conditions: 1A (0.2 mmol), 2a (0.3 mmol), catalyst (0.02 mmol), additive (0.04 mmol), water (3 mL) under 120°C for 20 min. <sup>b</sup> DBSA= Dodecyl benzenesulfonic acid. <sup>c</sup> Reaction was performed at 120°C in water using oil bath for 14h.

## Characterization of the Michael Addition Intermediate 8Aa

### 3-(2-nitro-1-(2-(phenylethynyl) phenyl) ethyl)-1H-indole (8Aa)

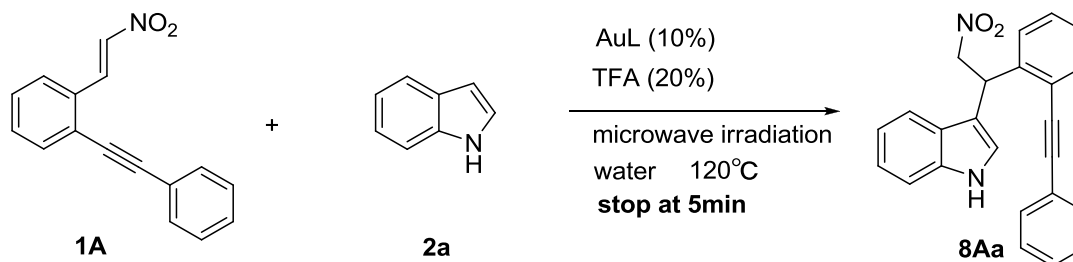

To a mixture of (*E*)-1-(2-nitrovinyl)-2-(phenylethynyl)benzene (**1A**, 0.2 mmol) and indole (**2a**, 0.3 mmol) in 3 mL of H<sub>2</sub>O was added Au catalyst I (0.02 mmol) and trifluoroethanoic acid (0.04 mmol). The reaction vial was sealed and the mixture was then irradiated at 120°C for 5 min. After the reaction was cooled to ambient temperature, the mixture was concentrated in vacuum, and the resulting residue was purified by flash chromatography (petroleum ether/ethyl acetate = 10/1, v/v) to afford the expected product **8Aa** (46mg, 62%) as light yellow solid. <sup>1</sup>H NMR (400 MHz, CDCl<sub>3</sub>) δ 8.14 (s, 1H), 7.62-7.60 (m, 3H), 7.48-7.46 (d, *J* = 8.0 Hz, 1H), 7.36-7.35 (m, 4H), 7.26-7.18 (m, 5H), 7.05 (t, *J* = 7.6 Hz, 1H), 5.95 (dd, *J* = 9.6, 6.4 Hz, 1H), 5.13-5.03 (m, 2H); <sup>13</sup>C NMR (100 MHz, CDCl<sub>3</sub>) δ 140.6, 136.5, 132.7, 131.7, 128.8, 128.6,

128.5, 127.6, 127.4, 126.5, 122.8, 122.8, 122.7, 121.7, 119.9, 119.2, 113.7, 111.3, 95.3, 86.8, 78.4, 39.5; LRMS (ESI)  $m/z$  367 ( $M+H$ )<sup>+</sup>.

## Derivatization of Product 3Me

### 2-Methoxy-9-methyl-6-(*p*-tolyl)-5,12-dihydrobenzo[4,5]cyclohepta[1,2-*b*]indol-12-yl) methanamine (4Me)

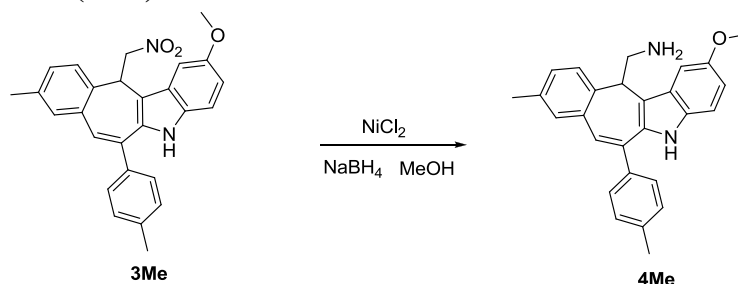

To a suspension of **3Me** (51.0 mg, 0.12 mmol, 1equiv.),  $\text{NiCl}_2$  (15.6 mg, 0.12 mmol, 1 equiv.) in 5 mL MeOH was added  $\text{NaBH}_4$  (22.7 mg, 0.60 mmol, 5 equiv.) at 0 °C for 1h. The reaction mixture was then quenched with saturated  $\text{NH}_4\text{Cl}$  solution and extracted with  $\text{CH}_2\text{Cl}_2$ . The combined organic phases was washed with brine and dried over  $\text{MgSO}_4$ . The concentrated organic fractions was then purified by flash column chromatography (DCM/MeOH = 15/1, v/v) to yield a yellow solid (32.0 mg, 67%).  $^1\text{H}$  NMR (400 MHz,  $\text{CDCl}_3$ )  $\delta$  7.75 (s, 1H), 7.48-7.46 (m, 2H), 7.29-7.26 (m, 5H), 7.18-7.07 (m, 2H), 6.92 (s, 1H), 6.81-6.79 (m, 1H), 4.47 (t,  $J$  = 8.0 Hz, 1H), 3.89 (s, 3H), 2.98 (d,  $J$  = 7.6 Hz, 2H), 2.44 (s, 3H), 2.35 (s, 3H), 2.25-2.15 (br, 2H); LRMS (ESI)  $m/z$  395 [ $M + H$ ]<sup>+</sup>.

## Stability test of Au catalyst I

Experiments were conducted to detect the stability of the Au catalyst I at high temperature: Au catalyst I+TFA were heated at 140°C for 30min, and followed by  $^{31}\text{P}$  NMR. As references, the  $^{31}\text{P}$  of the pure Au catalyst I and Au catalyst I+TFA at room temperature are measured.

Comparing  $^{31}\text{P}$  NMR of three spectrums shows Au catalyst I did not decompose and generate any leaching of the ligand in the presence of TFA at high temperature.

### a) $^{31}\text{P}$ NMR of pure Au catalyst I at room temperature

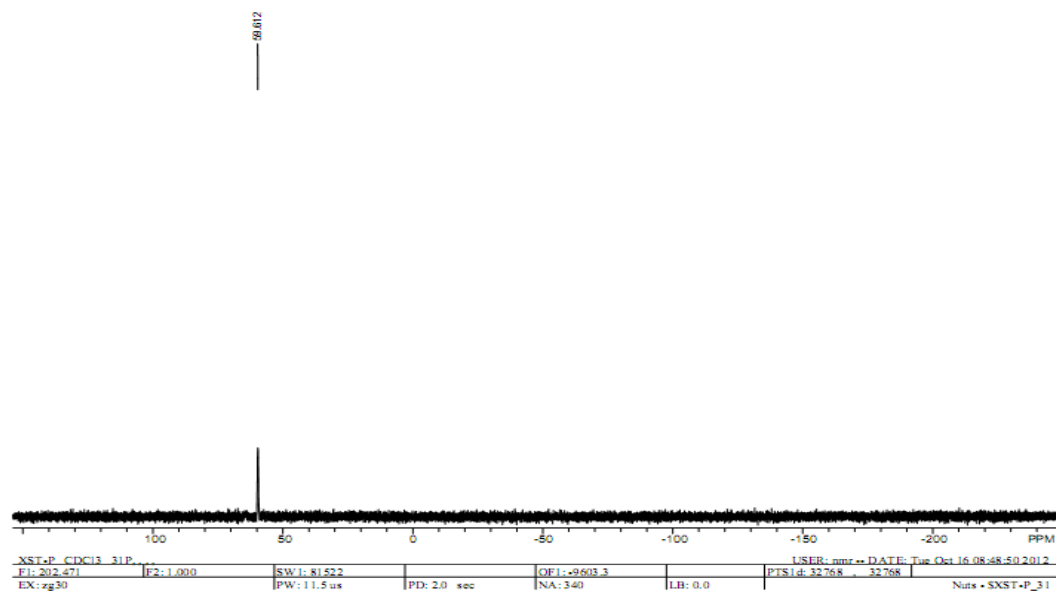

b)  $^{31}\text{P}$  NMR of Au catalyst I and TFA at room temperature

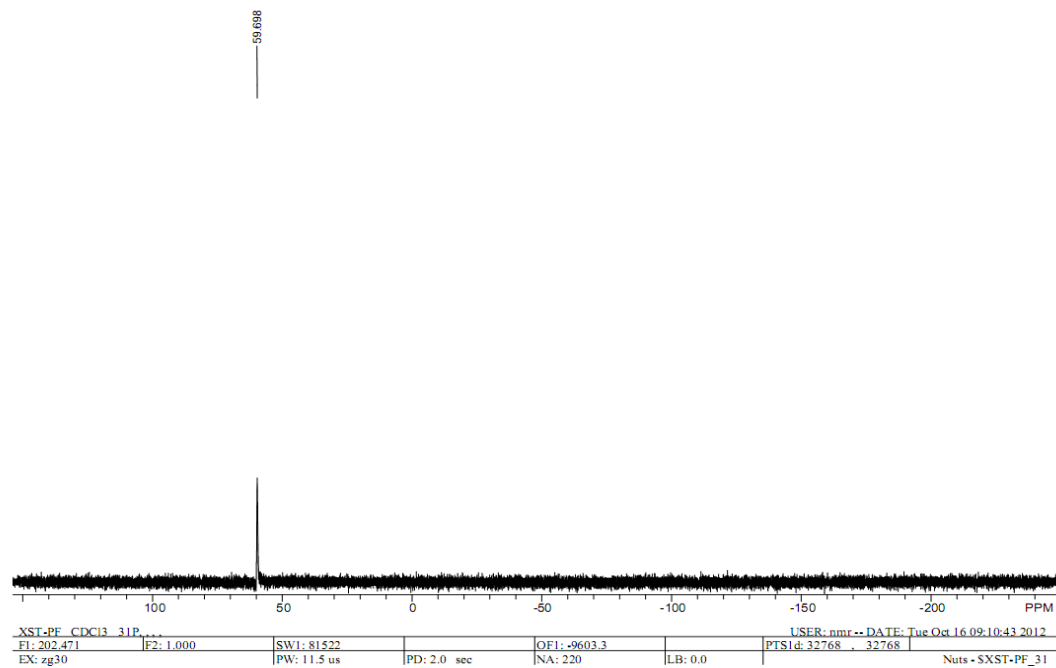

c)  $^{31}\text{P}$  NMR of Au catalyst I and TFA at 140 °C for 30min



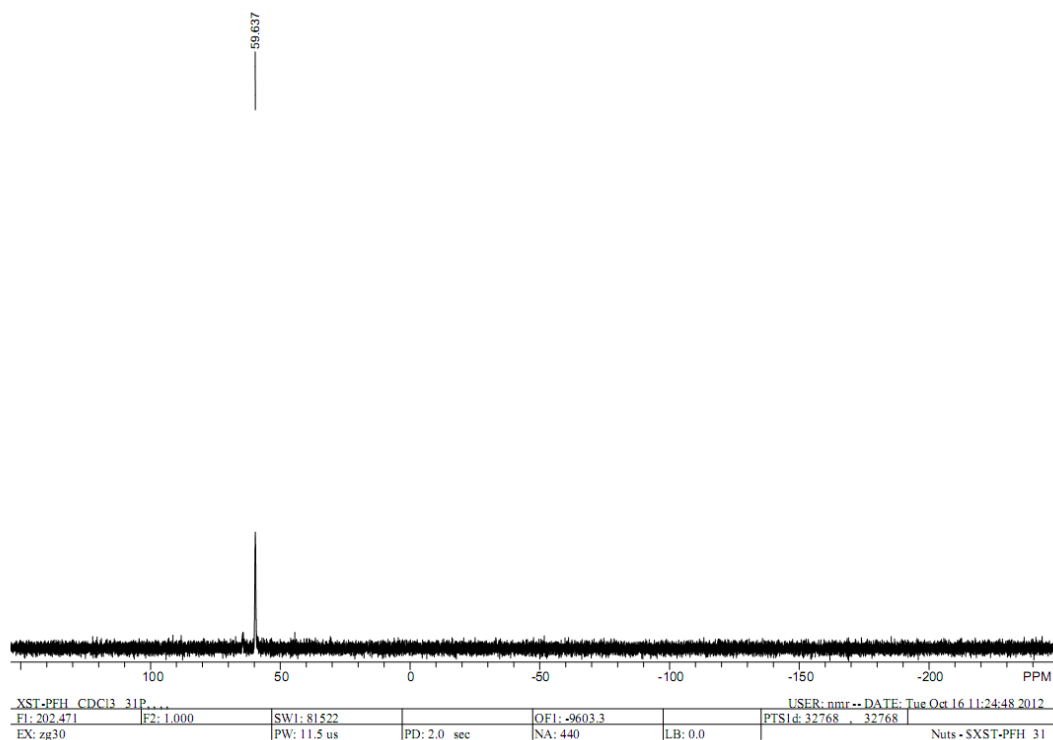

## General Procedure for Synthesis of 3Aa-3Mk

Typical procedure for synthesis of the 12-(Nitromethyl)-6-phenyl-5,12-dihydrobenzo [4,5]cyclohepta[1,2-*b*]indoles (**3Aa** as an Example) in water.

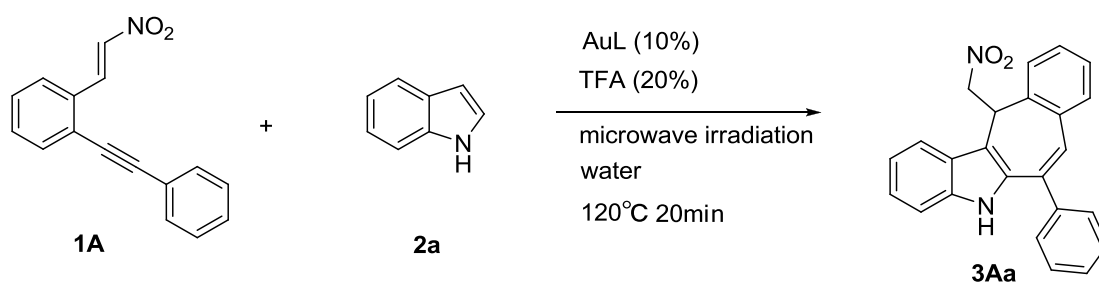

To a mixture of (*E*)-1-(2-nitrovinyl)-2-(phenylethynyl)benzene (**1A**, 0.2 mmol) and indole (**2a**, 0.3 mmol) in 3 mL of H<sub>2</sub>O was added Au catalyst I (0.02 mmol) and trifluoroethanoic acid (0.04 mmol). The reaction vial was sealed and the mixture was then irradiated at 120°C for 20 min. After cooling to ambient temperature, the mixture was concentrated in vacuum, and the resulting residue was purified by flash chromatography (petroleum ether/ethyl acetate = 10/1, v/v) to afford the expected product **3Aa** (64 mg, 87%) as white solid.

## Characterization Data for Starting Materials

### (*E*)-1-(2-nitrovinyl)-2-(phenylethynyl) benzene (1A)

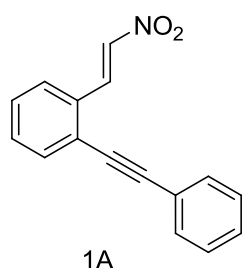

$^1\text{H}$  NMR (400 MHz,  $\text{CDCl}_3$ )  $\delta$  8.55 (d,  $J = 13.6$  Hz, 1H), 7.80 (d,  $J = 13.6$  Hz, 1H), 7.65-7.58 (m, 4H), 7.49-7.42 (m, 1H), 7.40-7.38 (m, 4H);  $^{13}\text{C}$  NMR (125 MHz,  $\text{CDCl}_3$ )  $\delta$  137.8, 136.7, 132.8, 131.2, 131.1, 131.0, 130.7, 128.7, 128.3, 128.1, 127.3, 124.8, 121.8, 96.5, 85.9, 76.5; LRMS (ESI)  $m/z$  250 ( $\text{M}+\text{H}$ ) $^+$ .

### (*E*)-1-(2-nitrovinyl)-2-(*p*-tolylethynyl) benzene (1B)

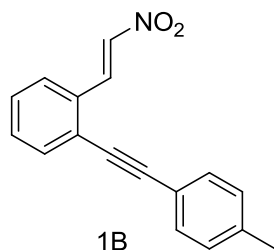

$^1\text{H}$  NMR (400 MHz,  $\text{CDCl}_3$ )  $\delta$  8.56 (d,  $J = 13.6$  Hz, 1H), 7.81 (d,  $J = 13.6$  Hz, 1H), 7.64-7.58 (m, 2H), 7.53-7.42 (m, 3H), 7.40-7.34 (m, 1H), 7.23-7.19 (m, 2H), 2.40 (s, 3H);  $^{13}\text{C}$  NMR (100 MHz,  $\text{CDCl}_3$ )  $\delta$  139.4, 138.1, 137.2, 133.2, 131.5, 131.4, 131.1, 129.3, 128.5, 127.8, 125.5, 119.1, 97.3, 85.9, 21.6; LRMS (ESI)  $m/z$  264 ( $\text{M}+\text{H}$ ) $^+$ .

### (*E*)-1-((4-fluorophenyl) ethynyl)-2-(2-nitrovinyl) benzene (1C)

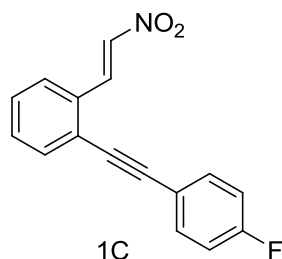

$^1\text{H}$  NMR (500 MHz,  $\text{CDCl}_3$ )  $\delta$  8.53 (d,  $J = 13.5$  Hz, 1H), 7.79 (d,  $J = 13.5$  Hz, 1H), 7.67-7.55 (m, 4H), 7.52-7.44 (m, 2H), 7.14-7.08 (m, 2H);  $^{13}\text{C}$  NMR (125 MHz,  $\text{CDCl}_3$ )  $\delta$  164.0 (d,  $J = 278$  Hz), 138.3, 137.1, 133.7 (d,  $J = 8$  Hz), 133.3 (d,  $J = 8$  Hz), 131.6, 131.2, 128.3, 127.8, 125.1, 116.0 (d,  $J = 22$  Hz), 115.6 (d,  $J = 22$  Hz), 95.9, 86.2; LRMS (ESI)  $m/z$  268 ( $\text{M}+\text{H}$ ) $^+$ .

**(E)-1-((4-chlorophenyl) ethynyl)-2-(2-nitrovinyl) benzene (1D)**

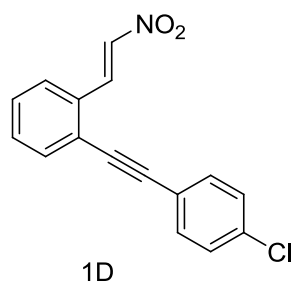

$^1\text{H}$  NMR (500 MHz,  $\text{CDCl}_3$ )  $\delta$  8.53 (d,  $J = 13.5$  Hz, 1H), 7.78 (d,  $J = 13.5$  Hz, 1H), 7.64-7.58 (m, 2H), 7.56-7.50 (m, 2H), 7.50-7.44 (m, 1H), 7.44-7.36 (m, 3H);  $^{13}\text{C}$  NMR (125 MHz,  $\text{CDCl}_3$ )  $\delta$  138.3, 137.0, 135.3, 133.3, 132.9, 131.6, 131.3, 129.0, 129.0, 127.7, 125.0, 120.7, 95.8, 87.3; LRMS (ESI)  $m/z$  284 ( $\text{M}+\text{H}$ ) $^+$ .

**(E)-1-((4-bromophenyl) ethynyl)-2-(2-nitrovinyl) benzene (1E)**

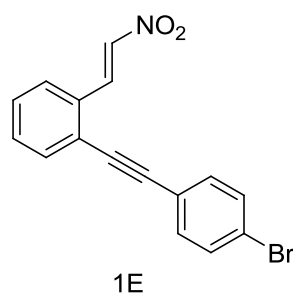

$^1\text{H}$  NMR (500 MHz,  $\text{CDCl}_3$ )  $\delta$  8.52 (d,  $J = 13.5$  Hz, 1H), 7.77 (d,  $J = 13.5$  Hz, 1H), 7.64-7.59 (m, 2H), 7.55-7.51 (m, 2H), 7.48-7.41 (m, 3H), 7.33-7.25 (m, 1H);  $^{13}\text{C}$  NMR (125 MHz,  $\text{CDCl}_3$ )  $\delta$  138.3, 137.0, 133.3, 133.0, 132.8, 131.9, 131.6, 131.5, 131.3, 129.1, 127.7, 124.9, 123.5, 121.2, 95.8, 87.5; LRMS (ESI)  $m/z$  329 ( $\text{M}+\text{H}$ ) $^+$ .

**(E)-1-(2-nitrovinyl)-2-(*m*-tolylethynyl) benzene (1F)**

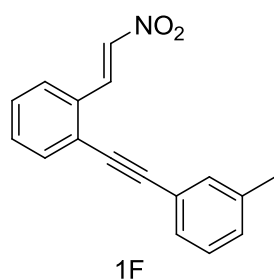

$^1\text{H}$  NMR (300 MHz,  $\text{CDCl}_3$ )  $\delta$  8.52 (d,  $J = 13.5$  Hz, 1H), 7.81 (d,  $J = 13.5$  Hz, 1H), 7.69-7.54 (m, 2H), 7.5-7.36 (m, 4H), 7.33-7.08 (m, 2H), 2.39 (s, 3H);  $^{13}\text{C}$  NMR (125 MHz,  $\text{CDCl}_3$ )  $\delta$  138.3, 138.2, 137.2, 133.3, 132.2, 131.5, 131.2, 130.1, 128.8, 128.7, 128.5, 127.8, 125.4, 122.1, 97.3, 86.1, 21.3; LRMS (ESI)  $m/z$  264( $\text{M}+\text{H}$ ) $^+$ .

**(E)-1-(cyclopentylethynyl)-2-(2-nitrovinyl) benzene (1G)**

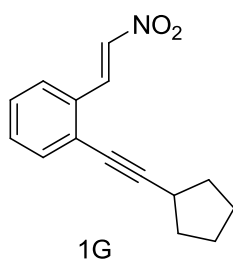

$^1\text{H}$  NMR (300 MHz,  $\text{CDCl}_3$ )  $\delta$  8.43 (d,  $J = 13.5$  Hz, 1H), 7.76 (d,  $J = 13.5$  Hz, 1H), 7.57-7.45 (m, 2H), 7.42-7.27 (m, 2H), 3.13- 2.77 (m, 1H), 2.14-1.93 (m, 2H), 1.90-1.71 (m, 4H), 1.70 -1.57 (m, 2H);  $^{13}\text{C}$  NMR (125 MHz,  $\text{CDCl}_3$ )  $\delta$  137.9, 137.5, 133.2, 131.3, 131.1, 128.0, 127.7, 126.2, 103.1, 77.6, 33.8, 31.0, 25.0; LRMS (ESI)  $m/z$  242 ( $\text{M}+\text{H}$ ) $^+$ .

**(E)-1-(2-nitrovinyl)-2-(pent-1-ynyl) benzene (1H)**

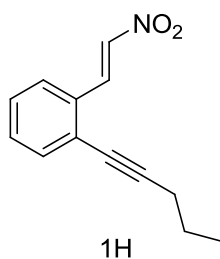

$^1\text{H}$  NMR (300 MHz,  $\text{CDCl}_3$ )  $\delta$  8.46 (d,  $J = 13.5$  Hz, 1H), 7.74 (d,  $J = 13.5$  Hz, 1H), 7.57-7.48 (m, 2H), 7.43-7.28 (m, 2H), 2.49 (t,  $J = 7.0$  Hz, 2H), 1.79-1.63 (m, 2H), 1.09 (t,  $J = 7.4$  Hz, 3H);  $^{13}\text{C}$  NMR (125 MHz,  $\text{CDCl}_3$ )  $\delta$  137.9, 137.5, 133.4, 131.4, 131.2, 128.1, 127.5, 126.2, 98.7, 78.1, 22.0, 21.7, 13.6; LRMS (ESI)  $m/z$  216 ( $\text{M}+\text{H}$ ) $^+$ .

**(E)-3-((2-(2-nitrovinyl) phenyl) ethynyl) thiophene (1I)**

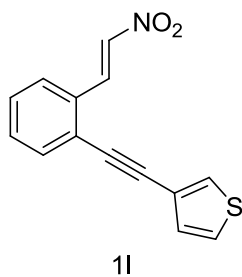

$^1\text{H}$  NMR (500 MHz,  $\text{CDCl}_3$ )  $\delta$  8.52 (d,  $J = 13.5$  Hz, 1H), 7.81 (d,  $J = 13.5$  Hz, 1H), 7.66-7.57 (m, 3H), 7.49-7.44 (m, 1H), 7.41-7.35 (m, 2H), 7.30-7.26 (m, 1H);  $^{13}\text{C}$  NMR (125 MHz,  $\text{CDCl}_3$ )  $\delta$  138.3, 137.2, 133.2, 131.5, 131.1, 129.8, 129.7, 128.7, 127.9, 125.9, 125.2, 121.3, 92.3, 86.1; LRMS (ESI)  $m/z$  256 ( $\text{M}+\text{H}$ ) $^+$ .

**(E)-4-fluoro-2-(2-nitrovinyl)-1-(phenylethynyl) benzene (1J)**

$^1\text{H}$  NMR (300 MHz,  $\text{CDCl}_3$ )  $\delta$  8.51 (d,  $J = 13.5$  Hz, 1H), 7.74 (d,  $J = 13.5$  Hz, 1H), 7.66-7.56 (m, 3H), 7.44-7.37 (m, 3H),

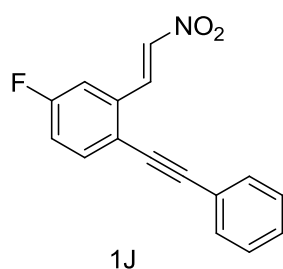

7.34-7.16 (m, 2H);  $^{13}\text{C}$  NMR (125 MHz,  $\text{CDCl}_3$ )  $\delta$  162.1 (d,  $J$  = 243 Hz), 139.1, 136.1 (d,  $J$  = 2 Hz), 135.2 (d,  $J$  = 8 Hz), 133.3 (d,  $J$  = 8 Hz), 131.6, 129.2, 128.6, 122.1, 121.6, 121.5, 119.1 (d,  $J$  = 22 Hz), 114.4 (d,  $J$  = 22 Hz), 96.7, 85.4; LRMS (ESI)  $m/z$  268 ( $\text{M}+\text{H}$ ) $^+$ .

**(E)-4-methyl-1-(2-nitrovinyl)-2-(phenylethynyl) benzene (1K)**

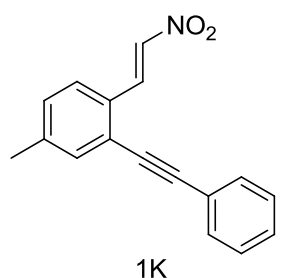

$^1\text{H}$  NMR (300 MHz,  $\text{CDCl}_3$ )  $\delta$  8.52 (d,  $J$  = 13.5 Hz, 1H), 7.79 (d,  $J$  = 13.5 Hz, 1H), 7.64-7.57 (m, 2H), 7.51-7.45 (m, 2H), 7.44-7.37 (m, 3H), 7.23-7.16 (m, 1H), 2.42 (s, 3H);  $^{13}\text{C}$  NMR (125 MHz,  $\text{CDCl}_3$ )  $\delta$  142.4, 137.5, 137.2, 133.8, 131.7, 129.9, 129.1, 128.6, 128.5, 127.9, 125.2, 122.4, 96.6, 86.6, 21.4; LRMS (ESI)  $m/z$  264 ( $\text{M}+\text{H}$ ) $^+$ .

**(E)-4-fluoro-2-(2-nitrovinyl)-1-(p-tolylethynyl) benzene (1L)**

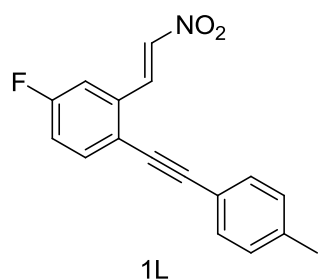

$^1\text{H}$  NMR (300 MHz,  $\text{CDCl}_3$ )  $\delta$  8.53 (d,  $J$  = 13.5 Hz, 1H), 7.80 (d,  $J$  = 13.5 Hz, 1H), 7.53-7.38 (m, 4H), 7.23-7.20 (m, 1H), 7.17-7.07 (m, 2H), 2.43 (s, 3H);  $^{13}\text{C}$  NMR (125 MHz,  $\text{CDCl}_3$ )  $\delta$  161.0 (d,  $J$  = 237 Hz), 139.5 (d,  $J$  = 10 Hz), 139.0, 136.1 (d,  $J$  = 2 Hz), 135.1 (d,  $J$  = 9 Hz), 133.1, 132.4, 131.5, 129.4, 129.2, 121.7, 119.1 (d,  $J$  = 22 Hz), 118.9, 114.3 (d,  $J$  = 23 Hz), 97.0, 84.9, 21.6; LRMS (ESI)  $m/z$  282 ( $\text{M}+\text{H}$ ) $^+$ .

**(E)-4-methyl-1-(2-nitrovinyl)-2-(p-tolylethynyl) benzene (1M)**

$^1\text{H}$  NMR (300 MHz,  $\text{CDCl}_3$ )  $\delta$  8.50 (d,  $J$  = 13.5 Hz, 1H), 7.79 (d,  $J$  = 13.5 Hz, 1H), 7.54-7.42 (m, 4H), 7.24-7.14 (m, 3H), 2.40 (s, 3H), 2.39 (s, 3H);  $^{13}\text{C}$  NMR (125 MHz,  $\text{CDCl}_3$ )

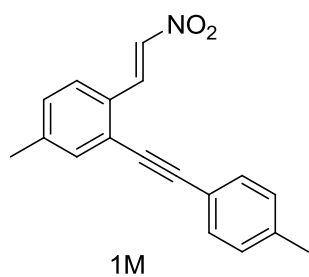

$\delta$  142.4, 139.4, 137.4, 137.3, 133.8, 131.6, 129.7, 129.4,  
 128.3, 127.9, 125.4, 119.3, 96.9, 86.1, 21.6, 21.4; LRMS  
 (ESI)  $m/z$  278 (M+H)<sup>+</sup>.

# NMR Data

## 3-(2-Nitro-1-(2-(phenylethynyl)phenyl)ethyl)-1H-indole (8Aa)

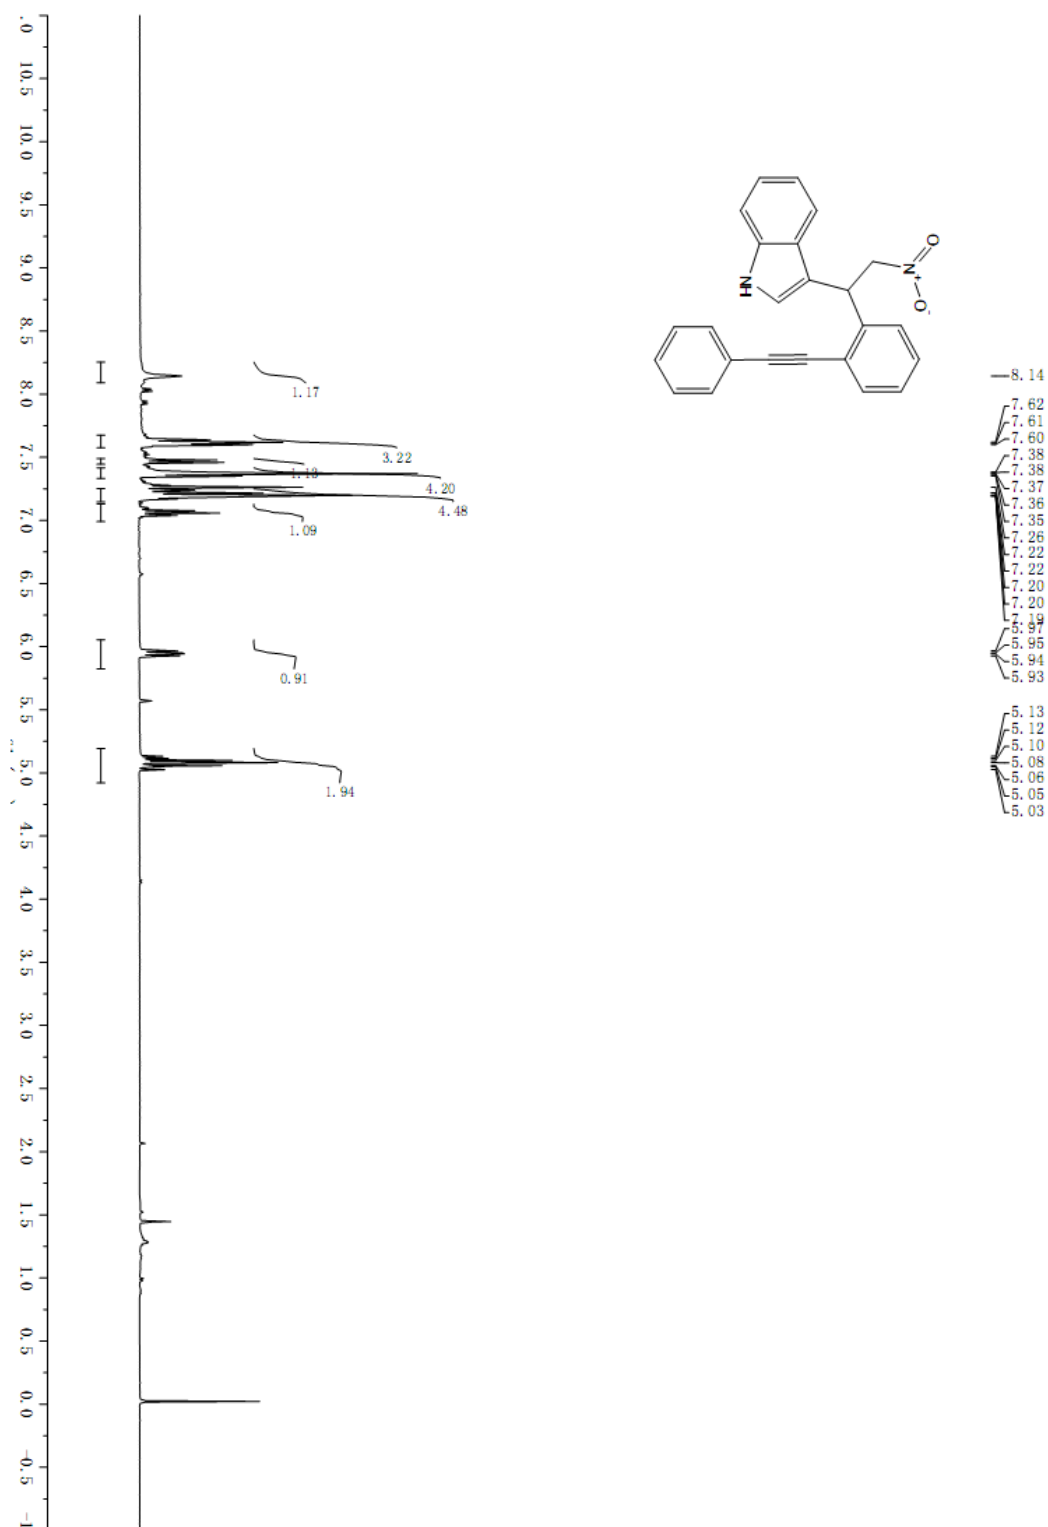

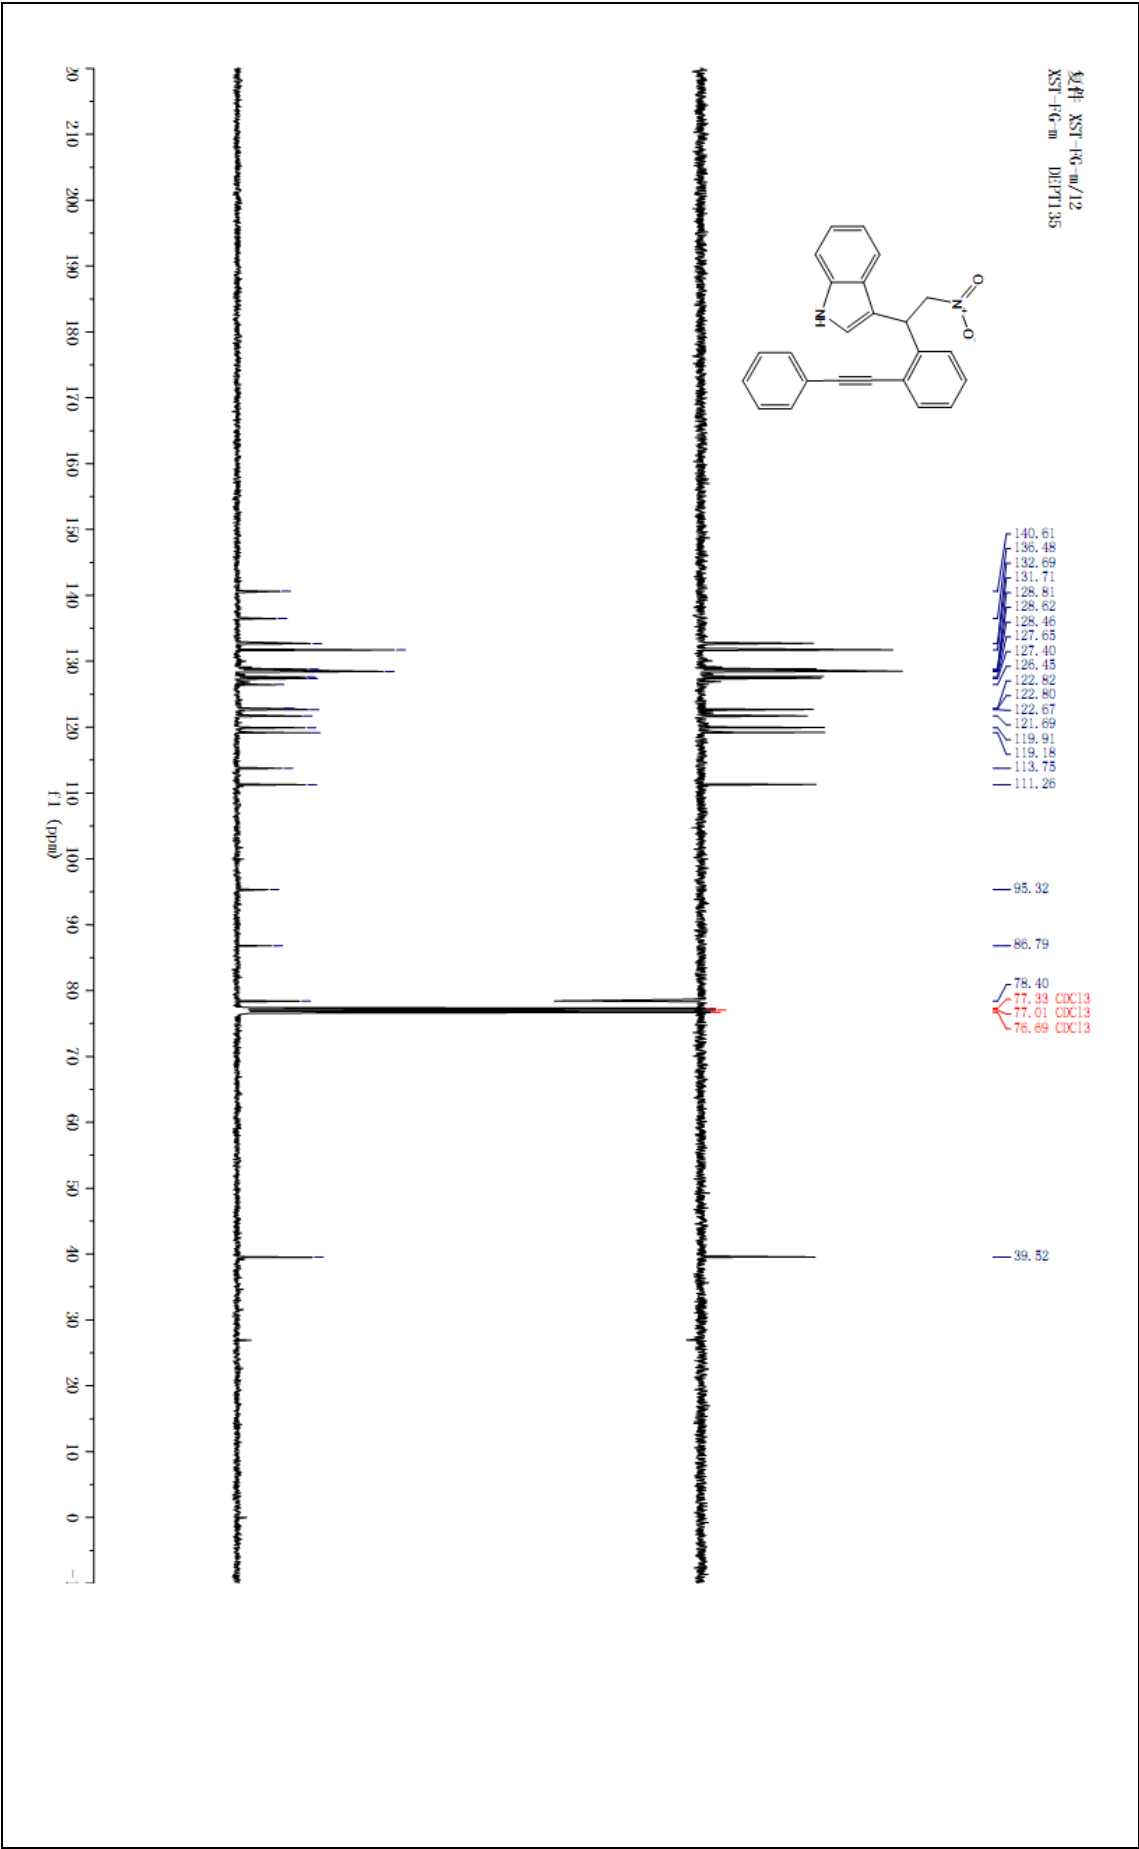





12-(Nitromethyl)-6-phenyl-5,12-dihydrobenzo[4,5]cyclohepta[1,2-*b*]indole (3Aa)

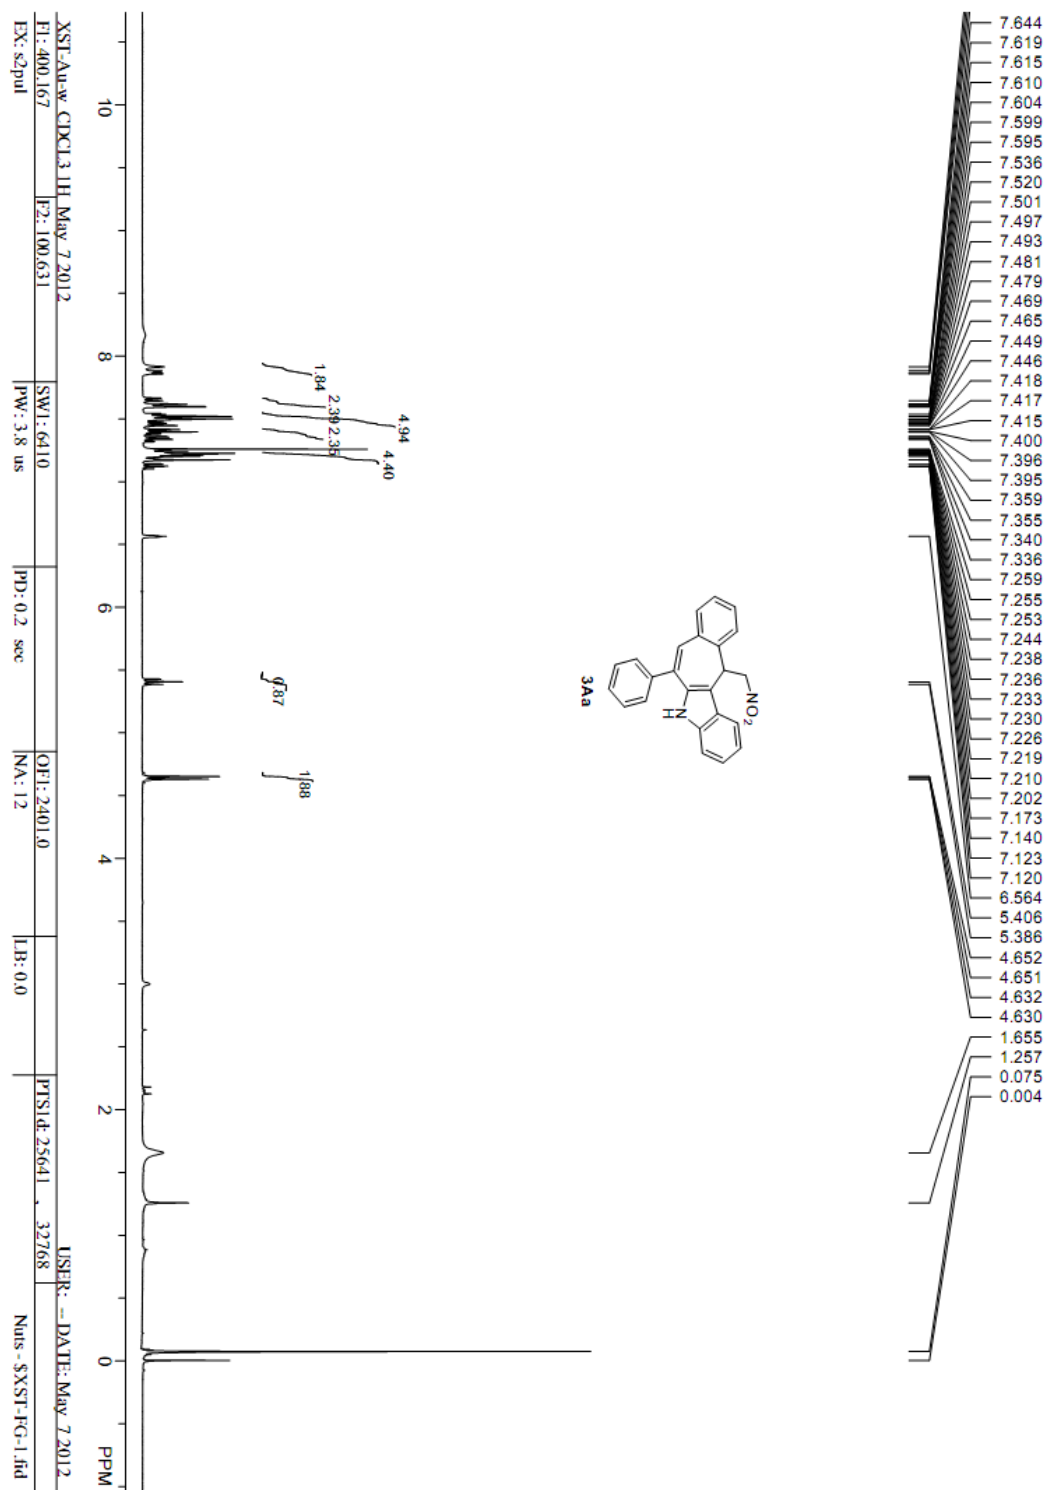

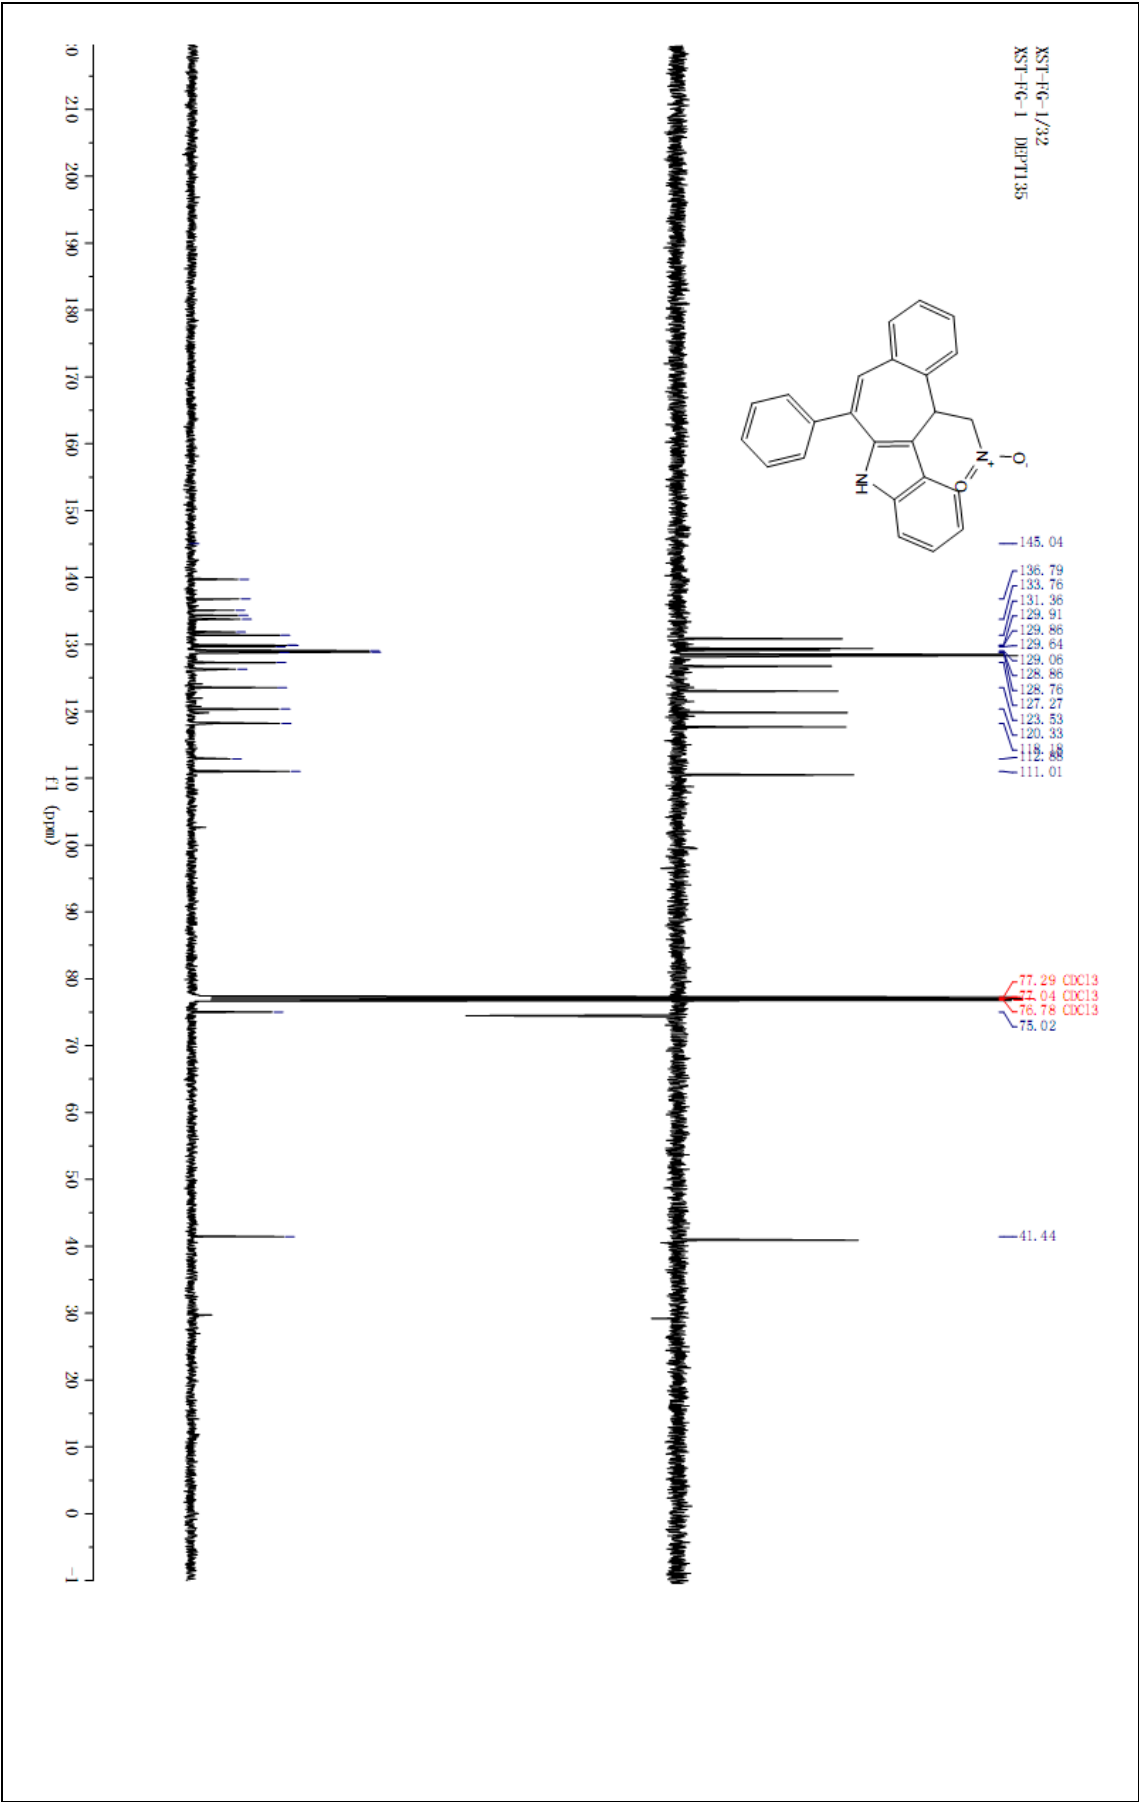

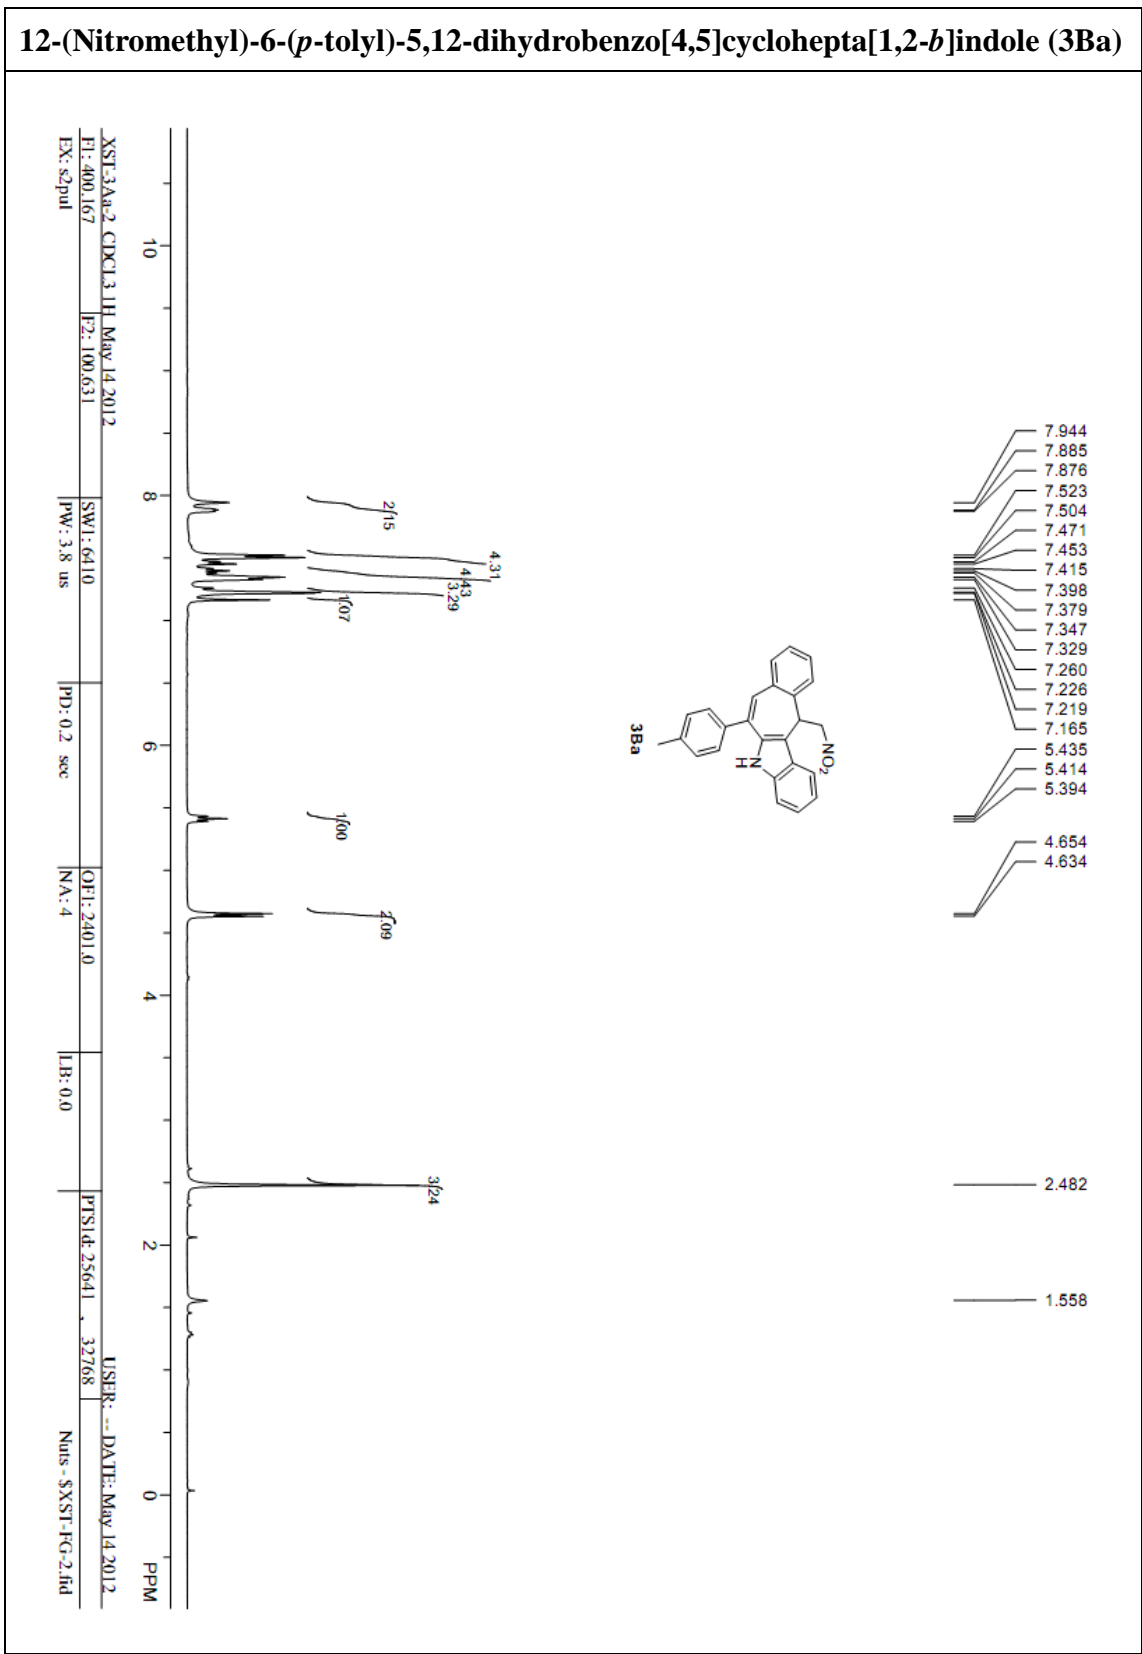

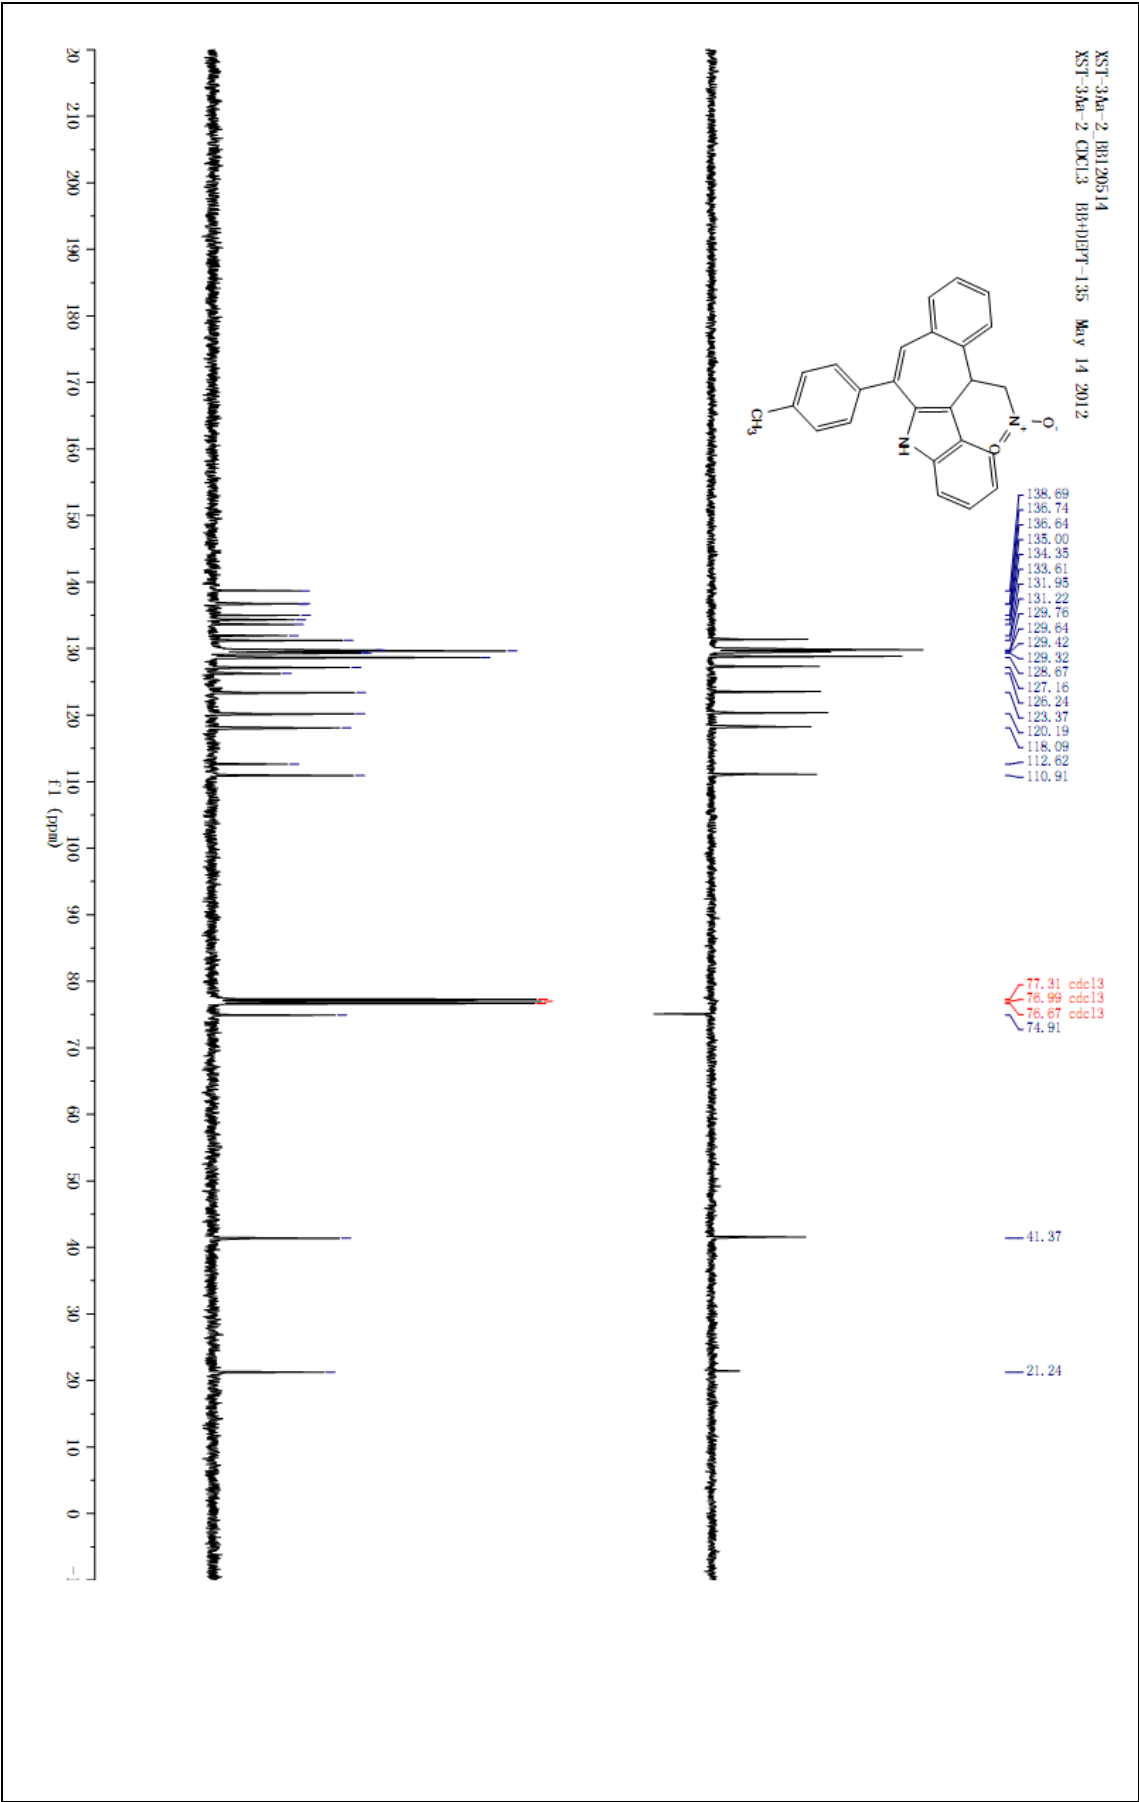

**12-(Nitromethyl)-6-(4-fluorophenyl)-5,12-dihydrobenzo[4,5]cyclohepta[1,2-*b*]  
indole (3Ca)**

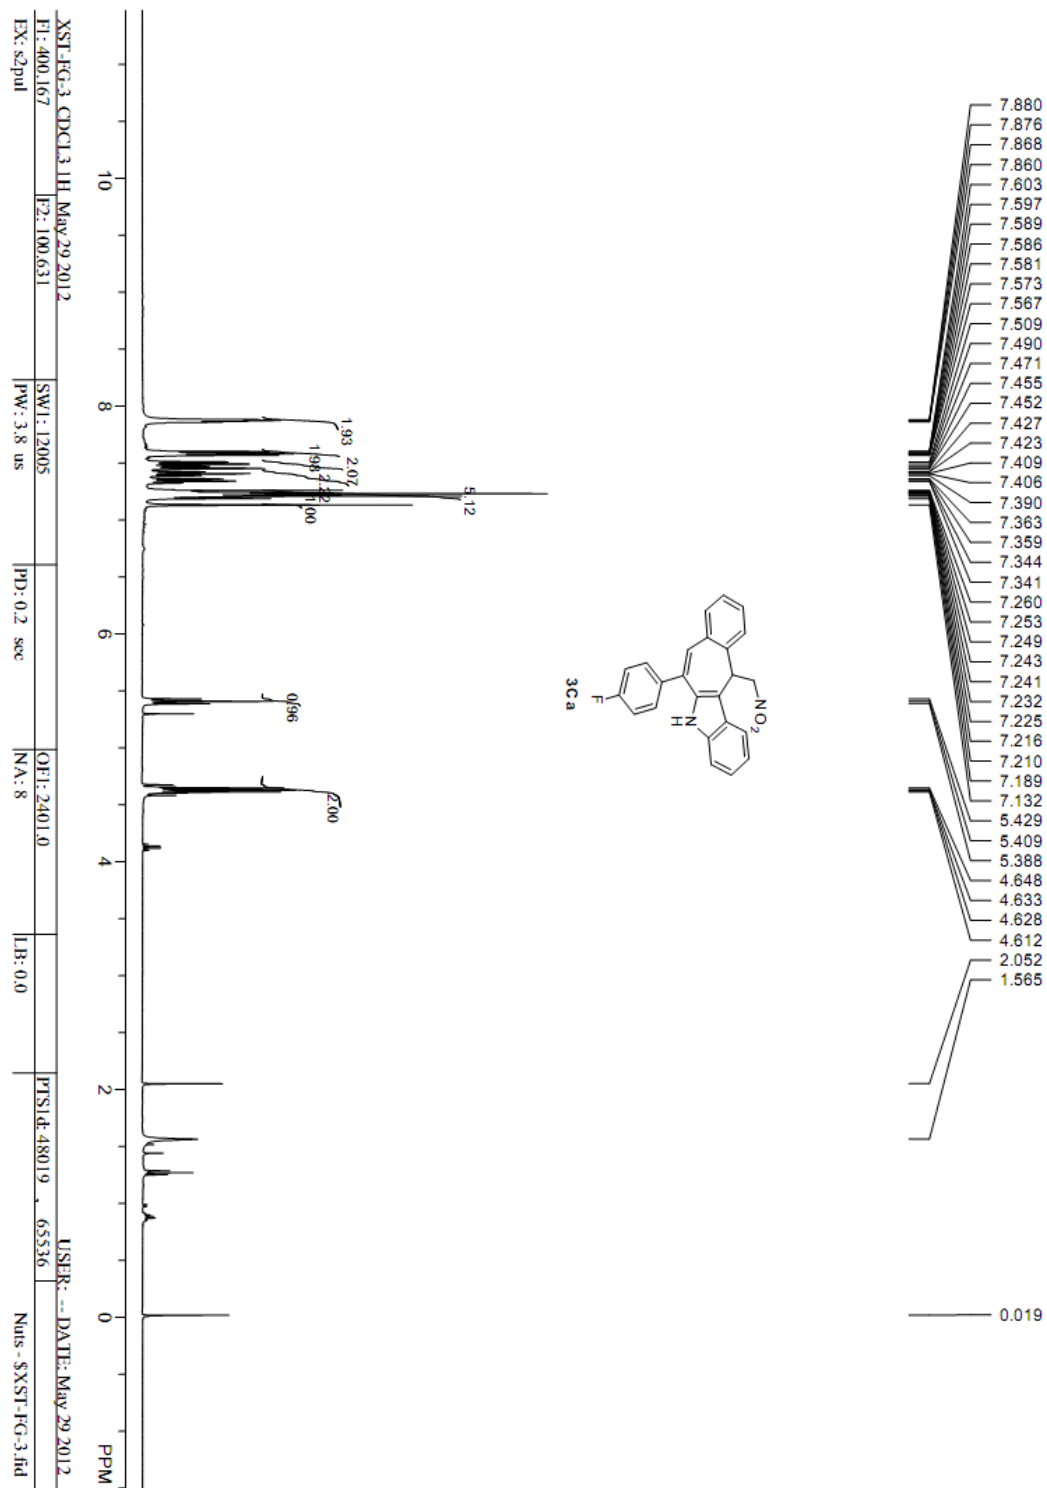

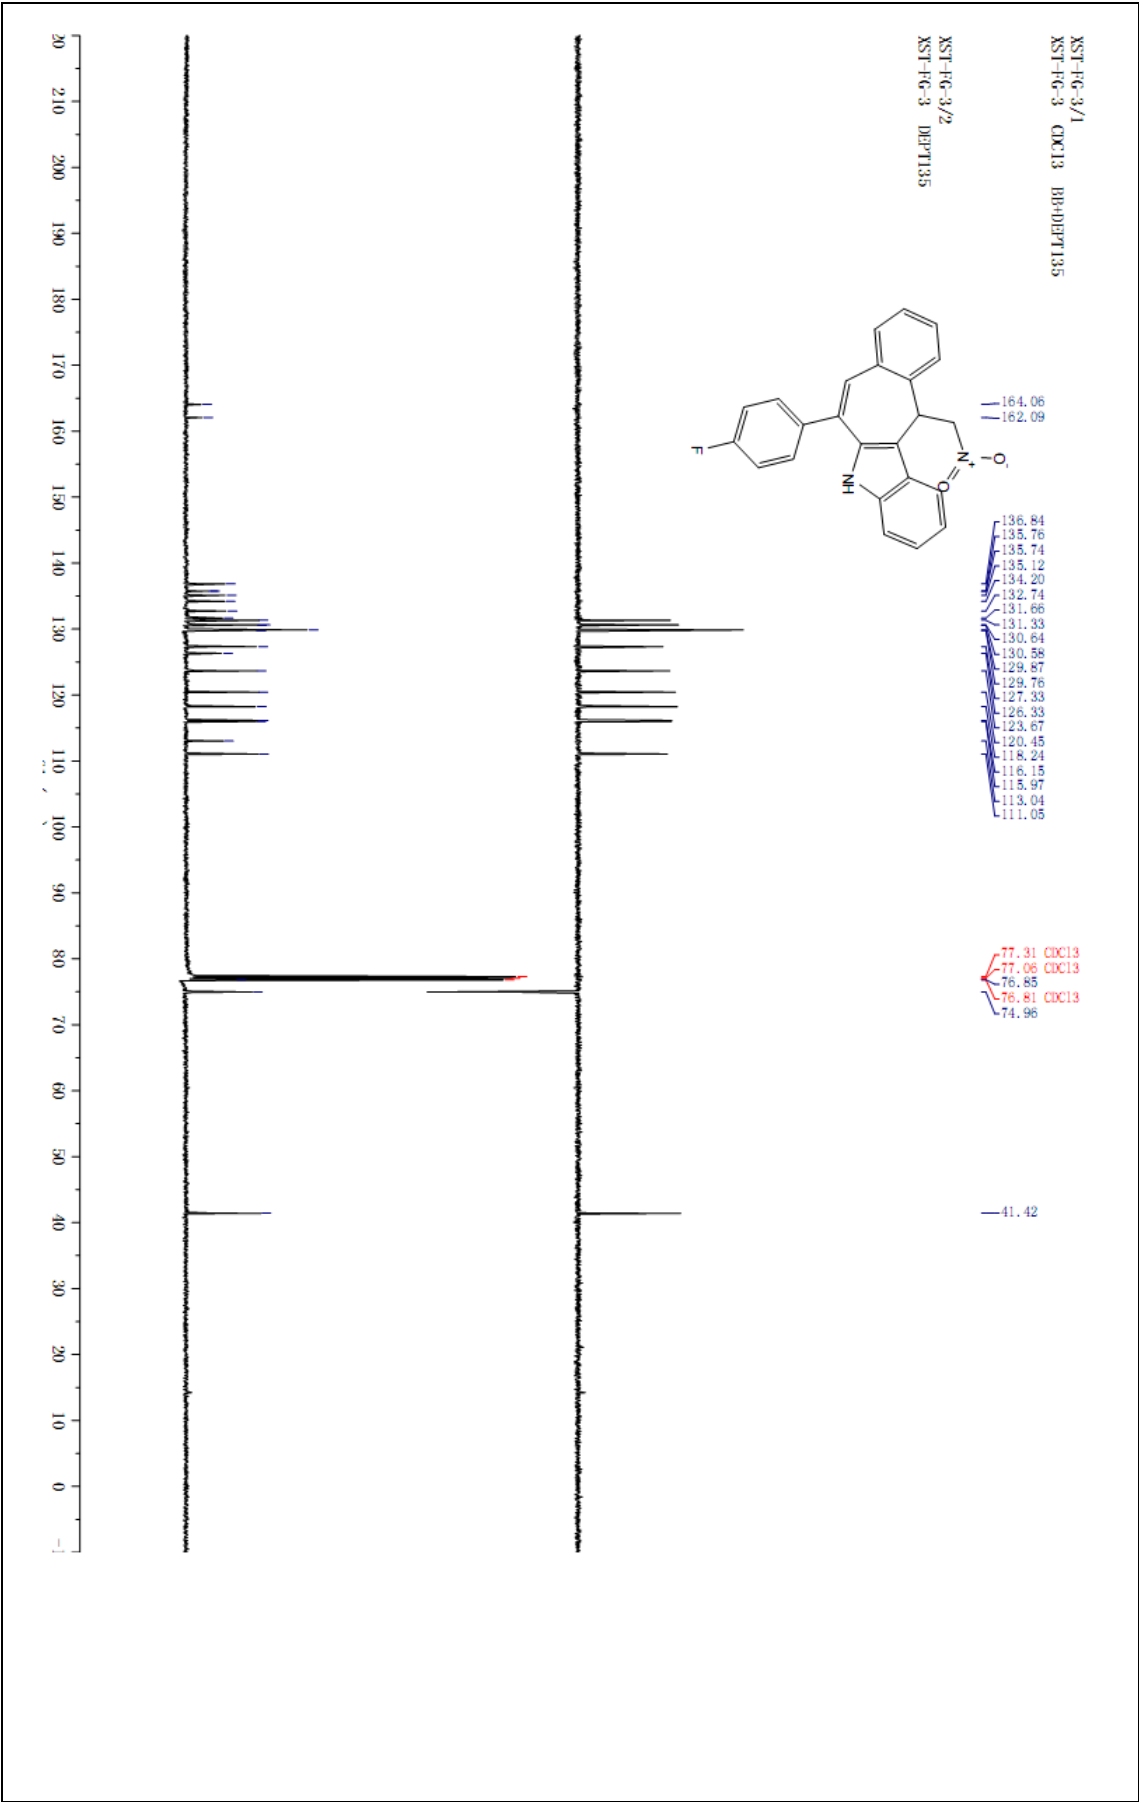

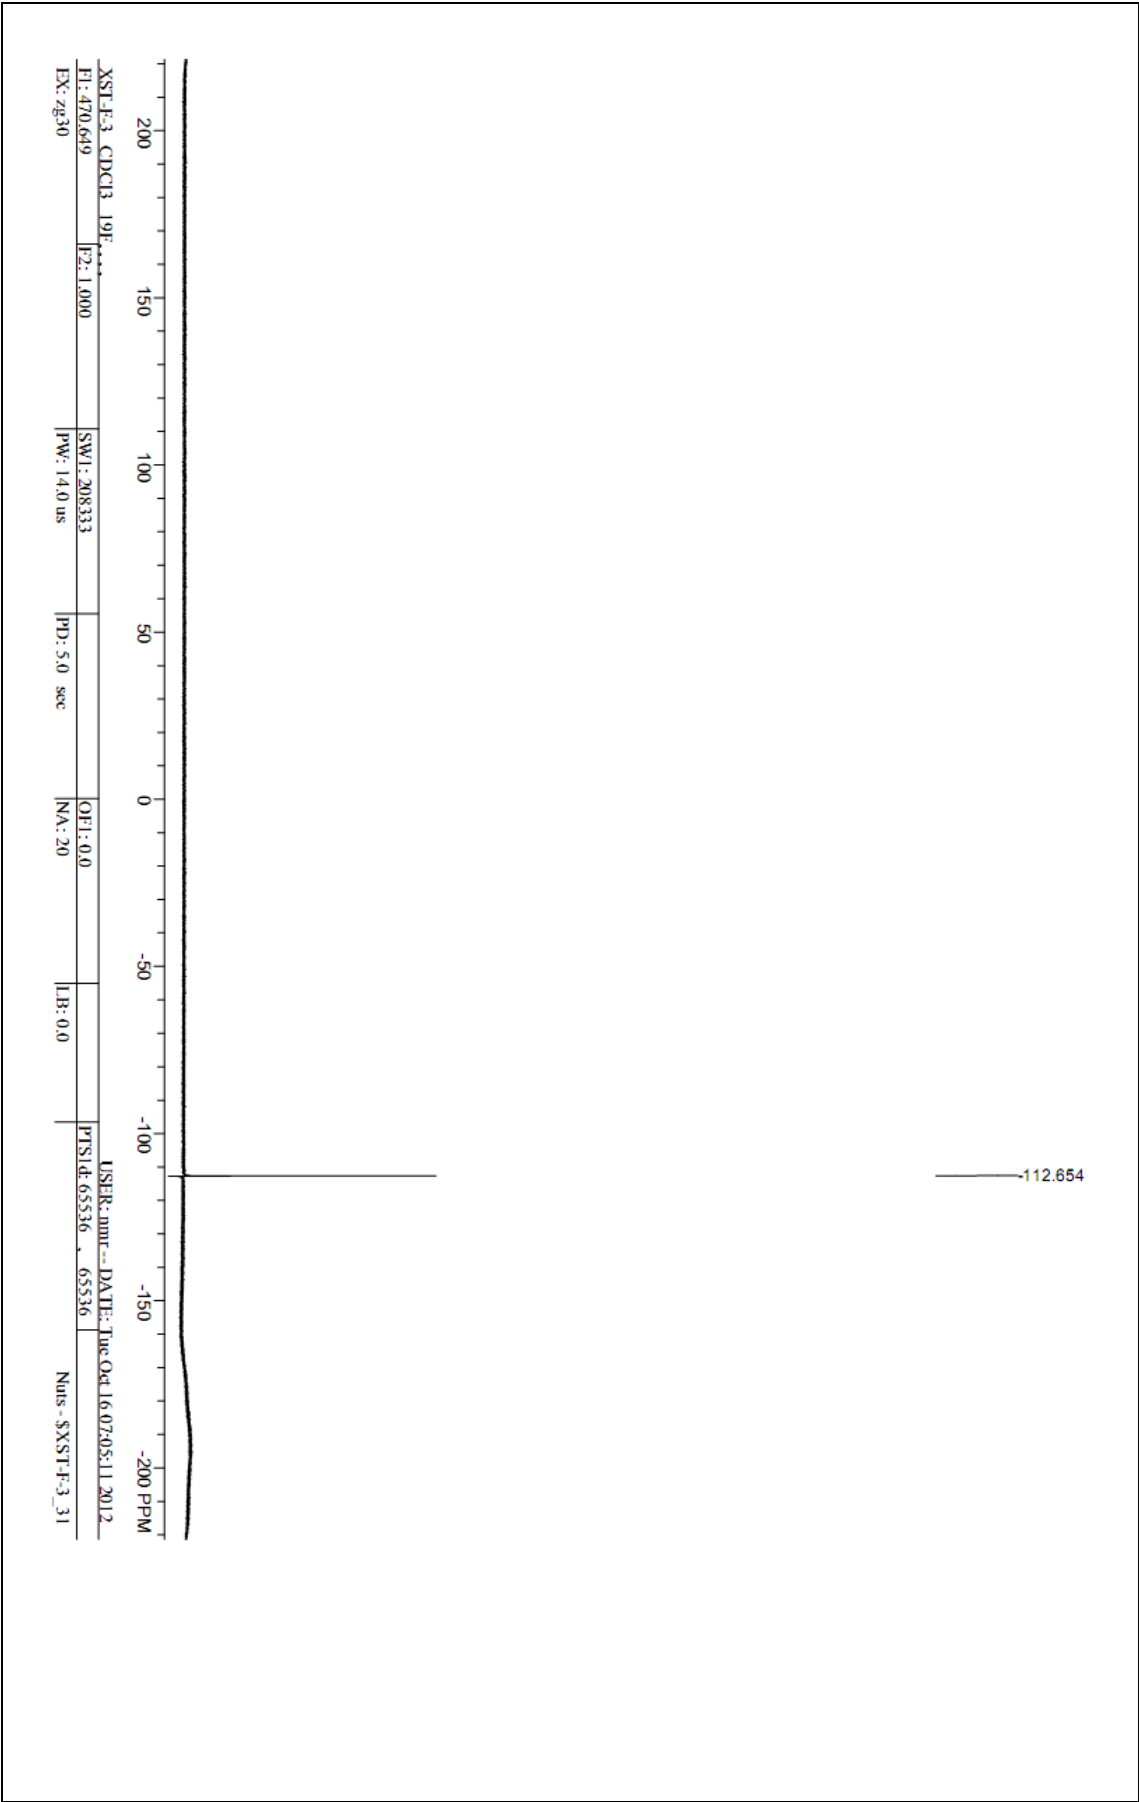





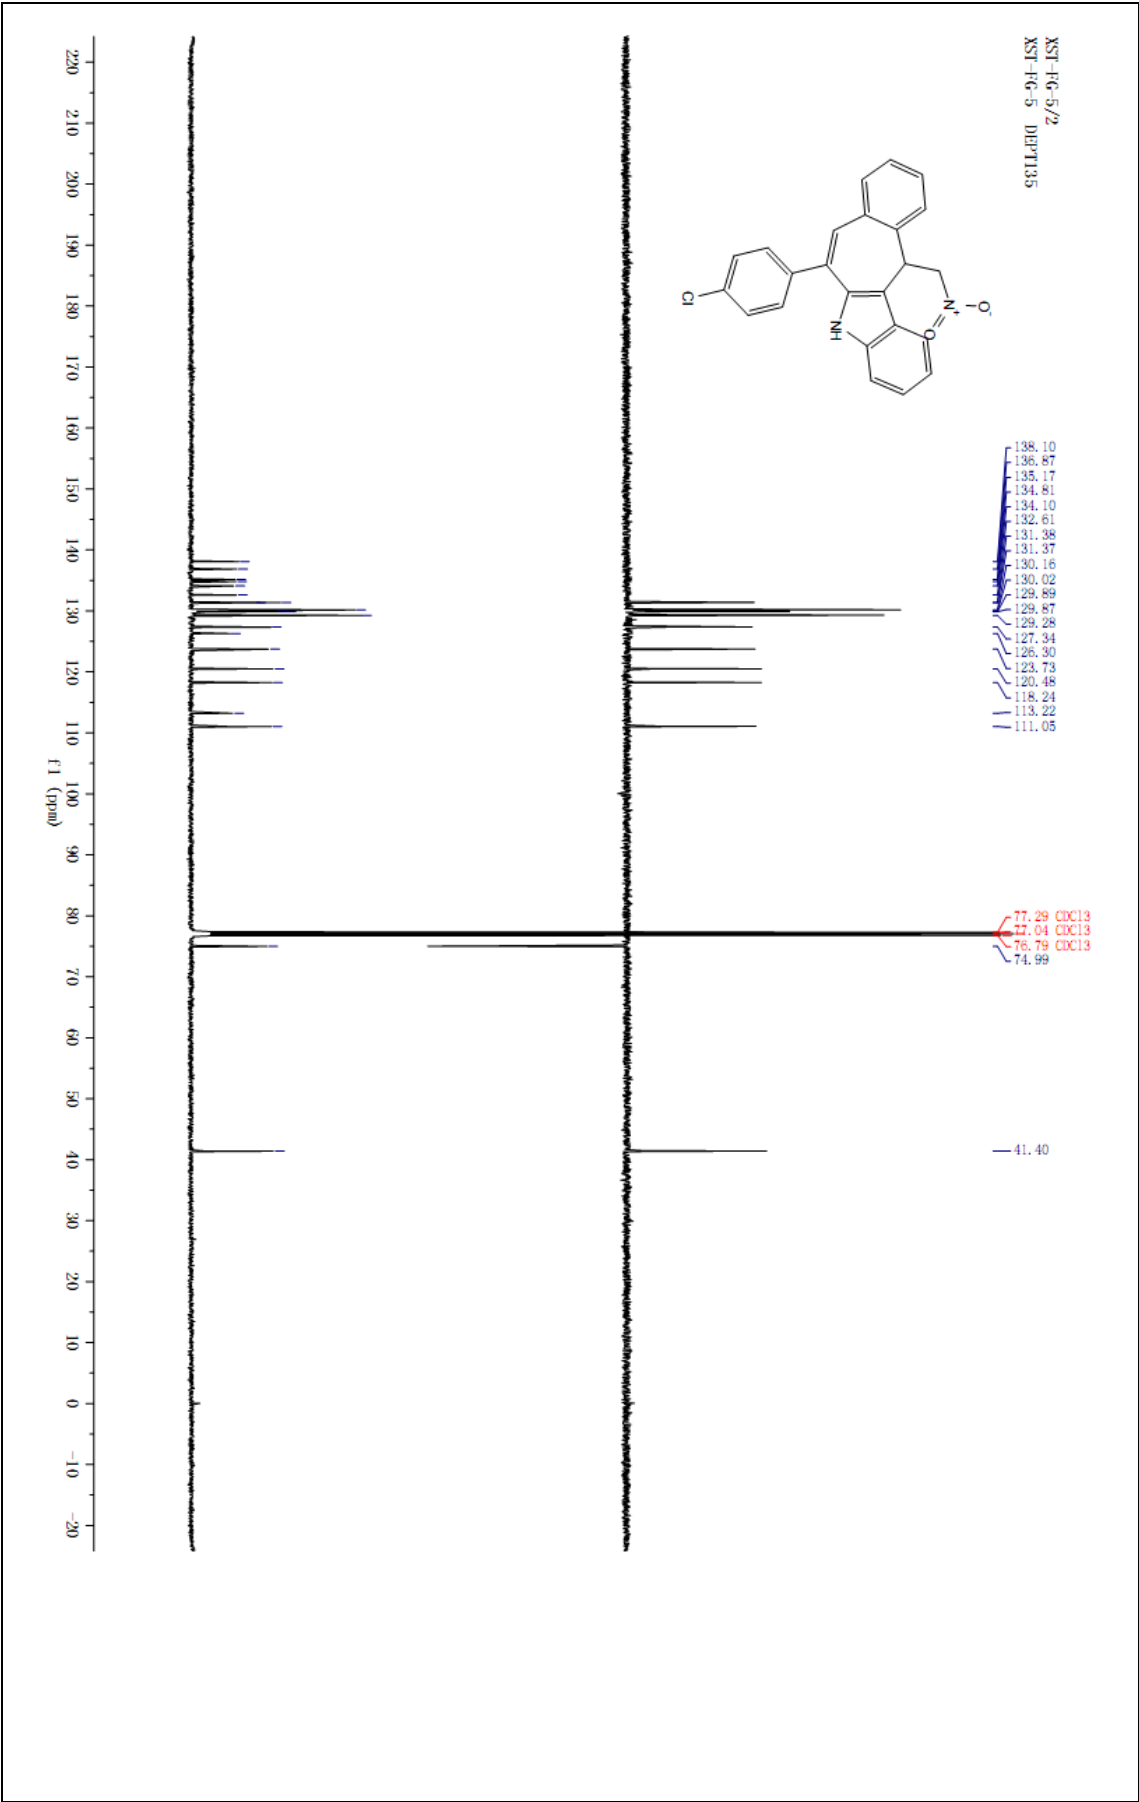



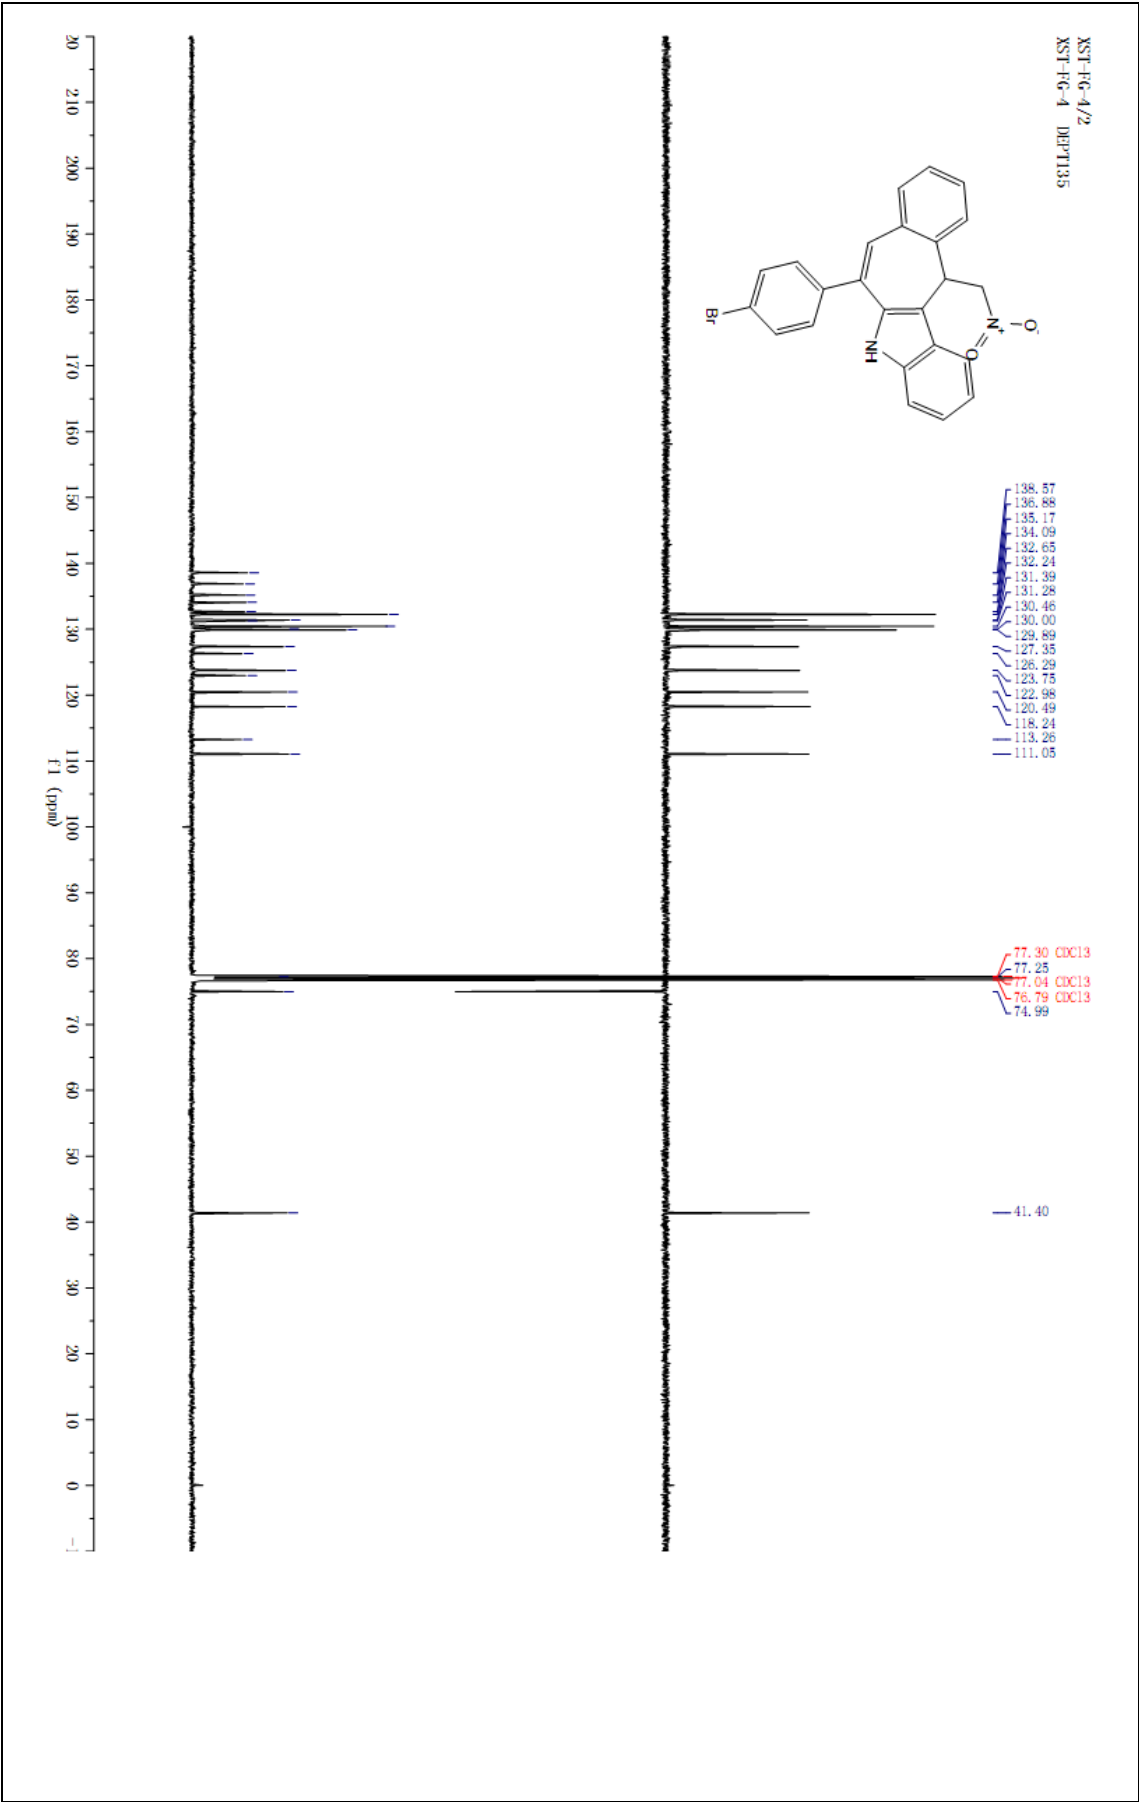

**12-(Nitromethyl)-6-(*m*-tolyl)-5,12-dihydrobenzo[4,5]cyclohepta[1,2-*b*]  
indole (3Fa)**

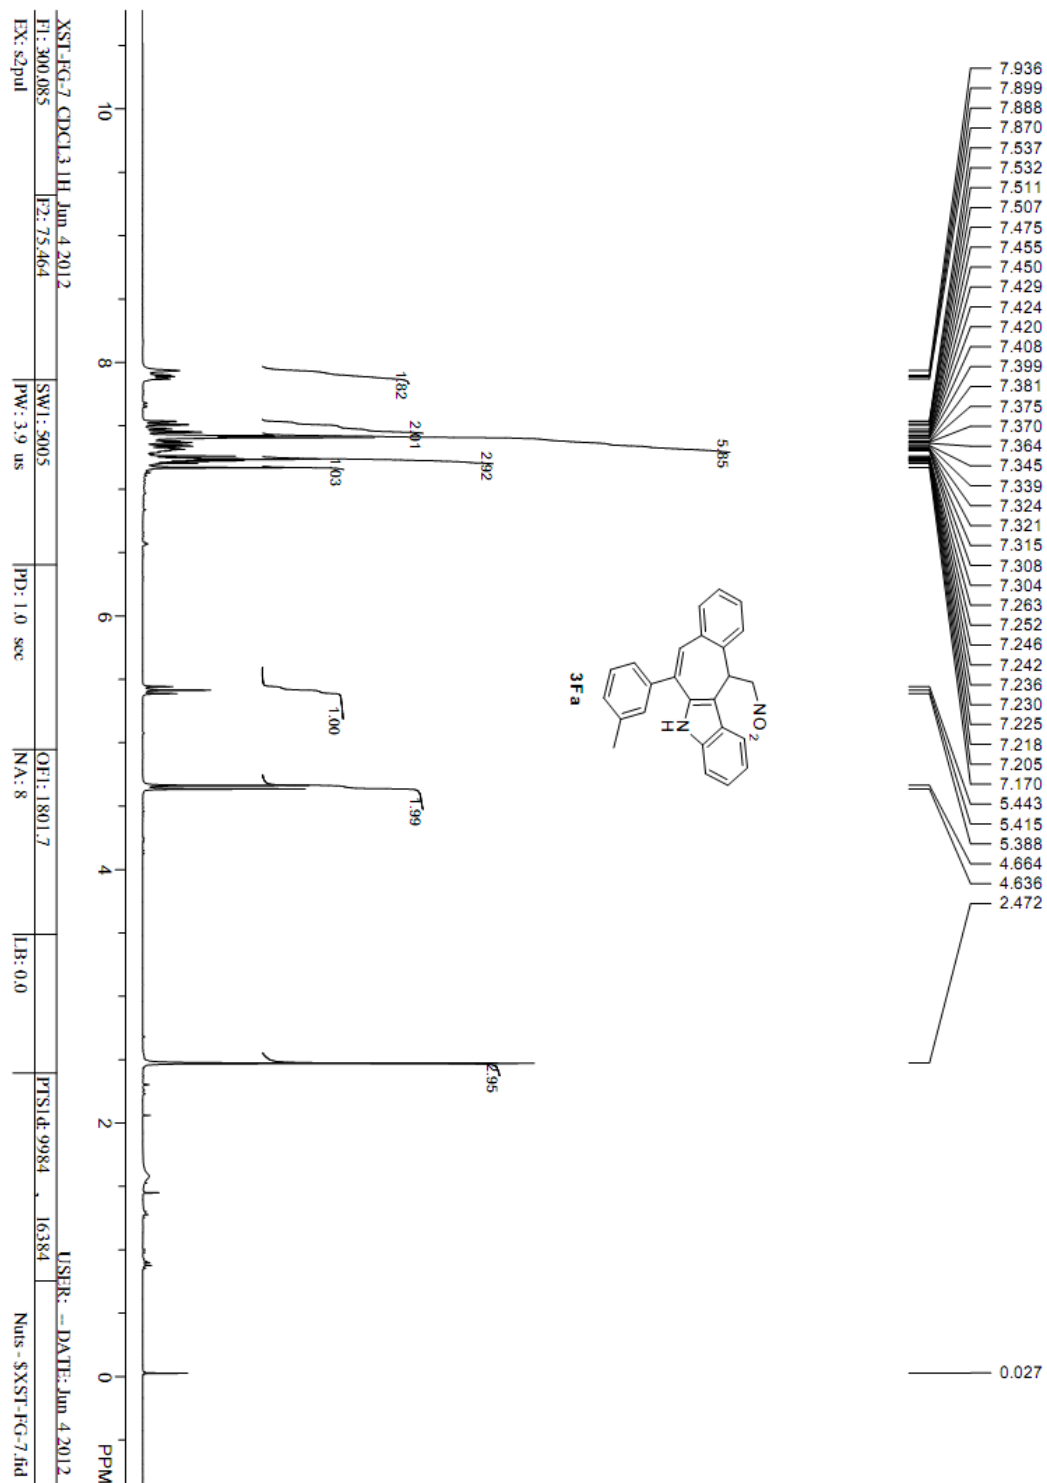

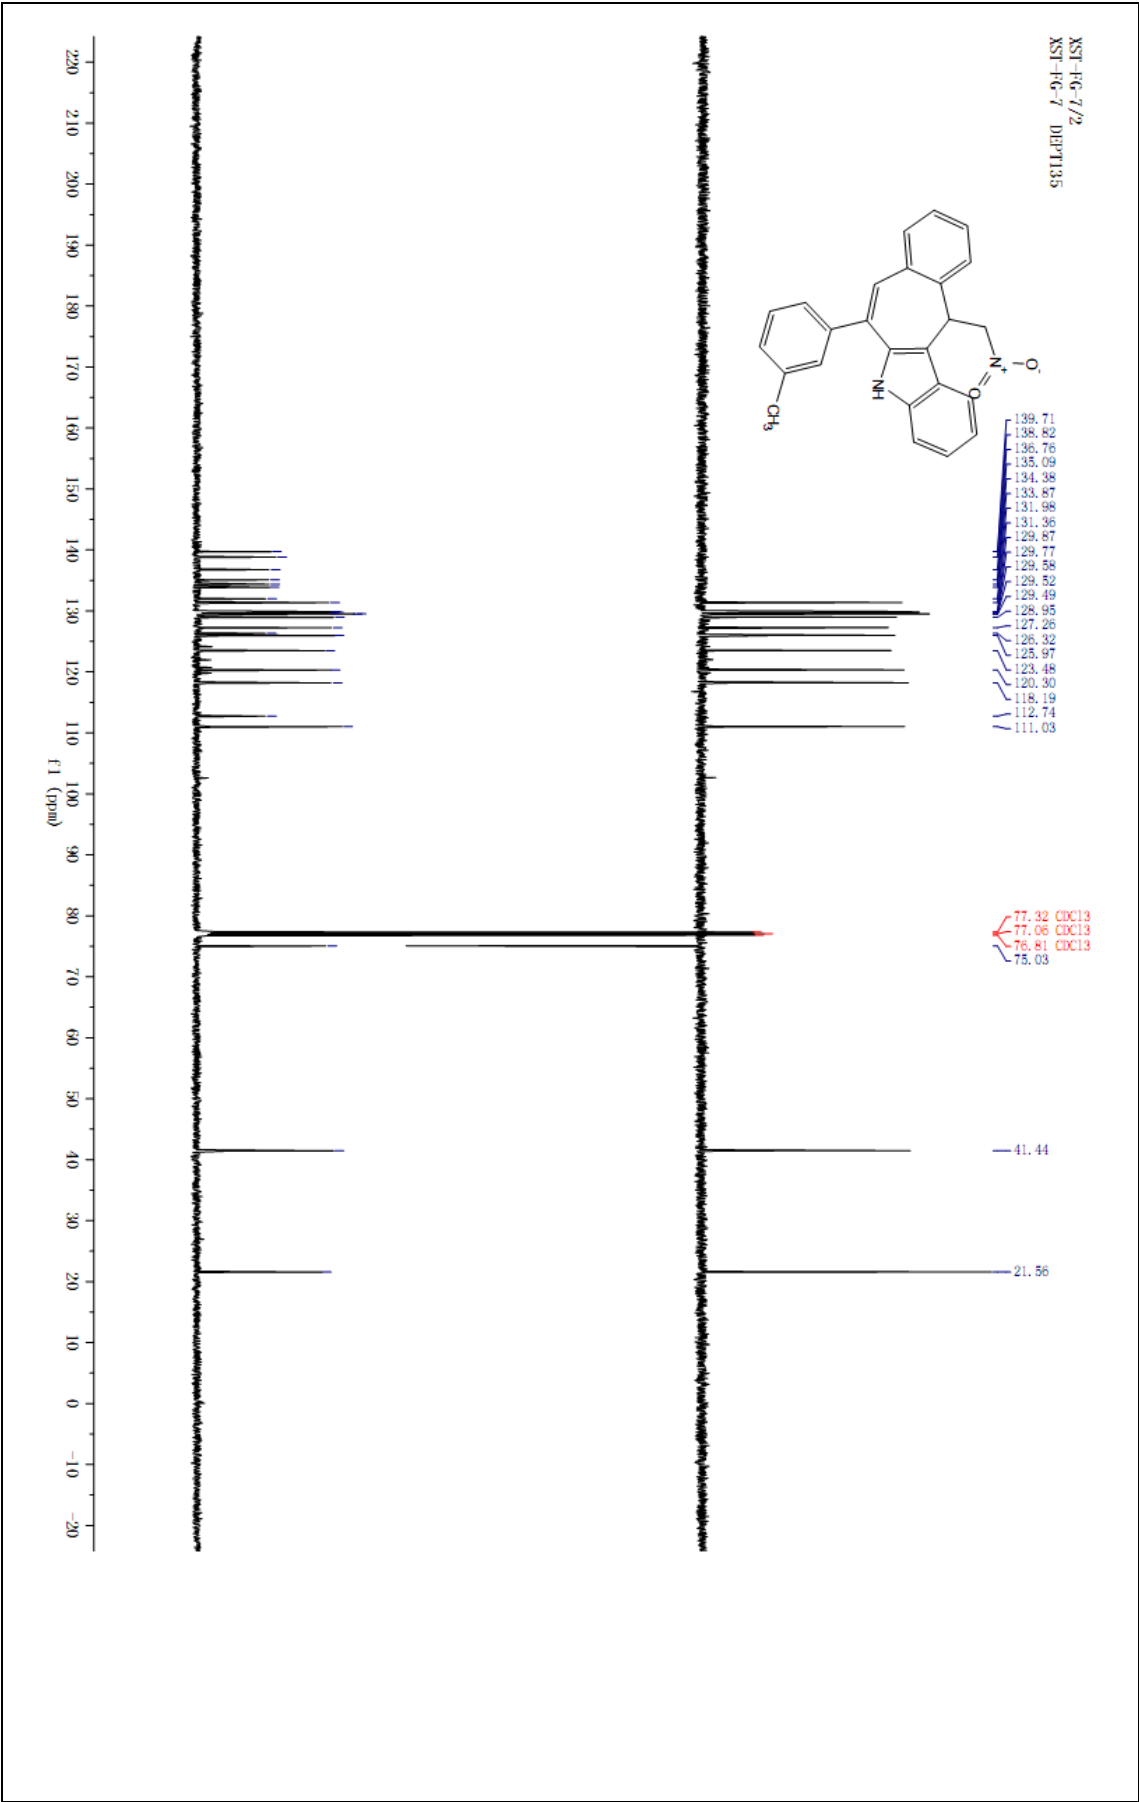

**2-Fluoro-12-(nitromethyl)-6-phenyl-5,12-dihydrobenzo[4,5]cyclohepta  
[1,2-*b*] indole(3Ab)**

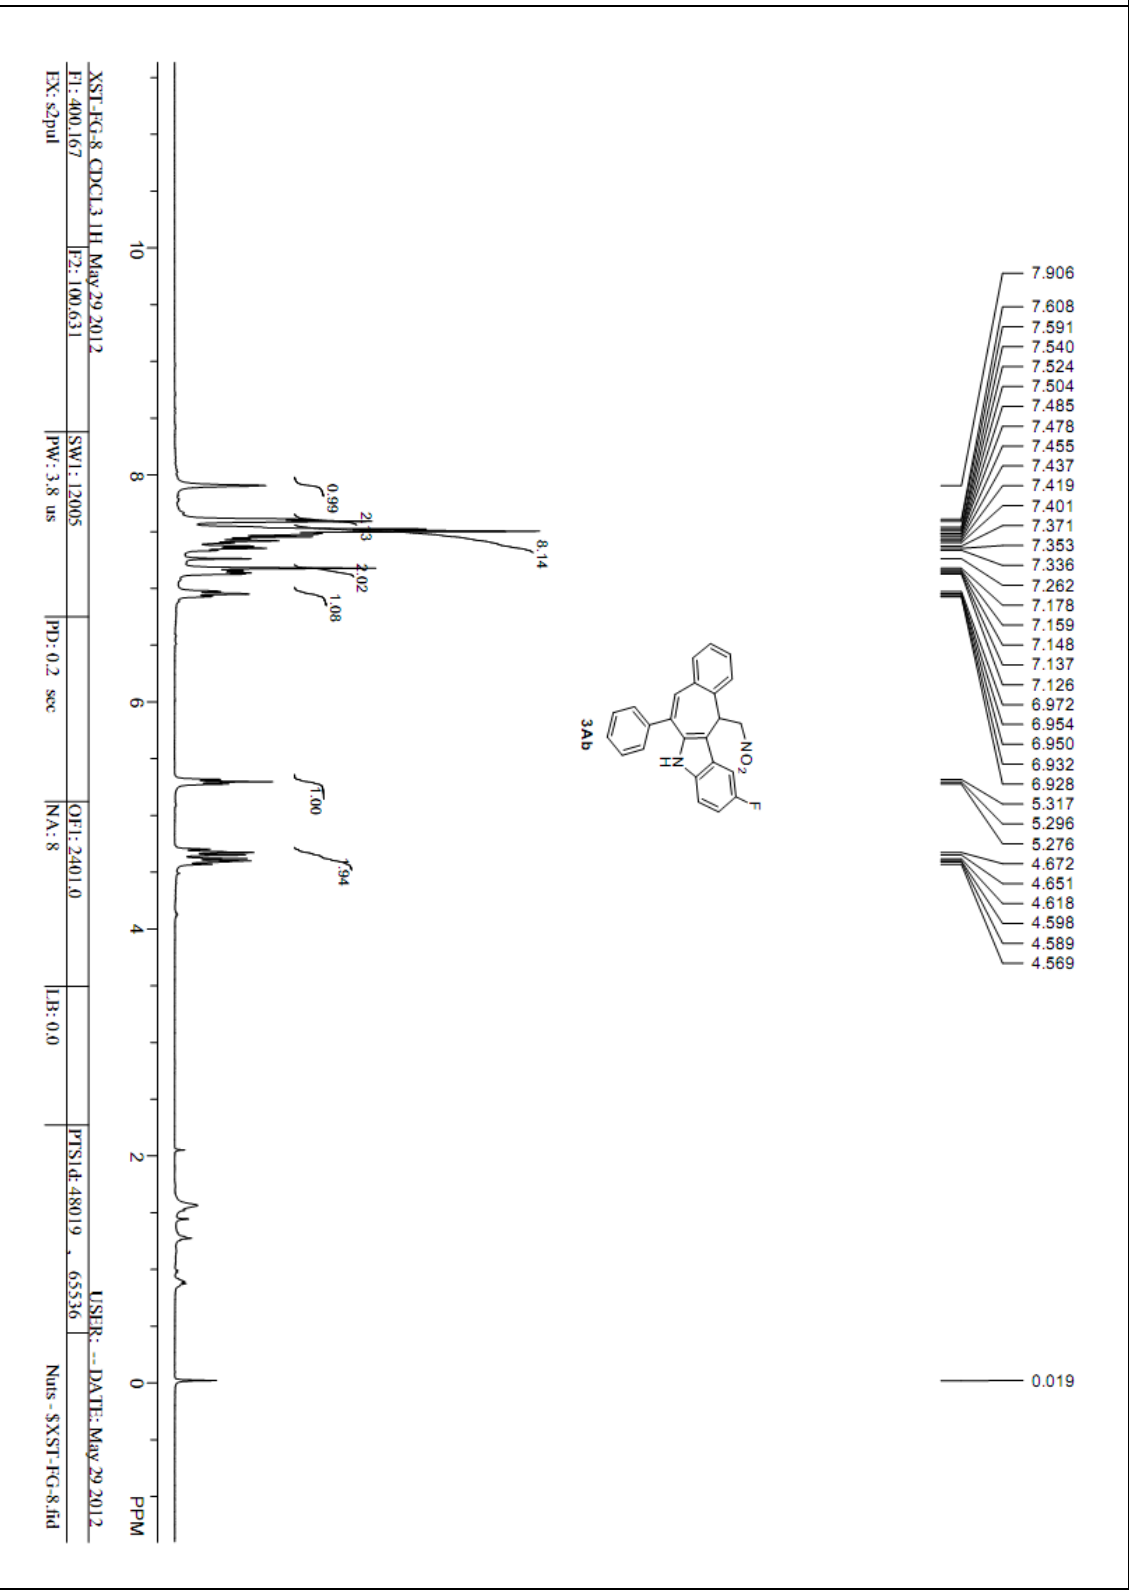

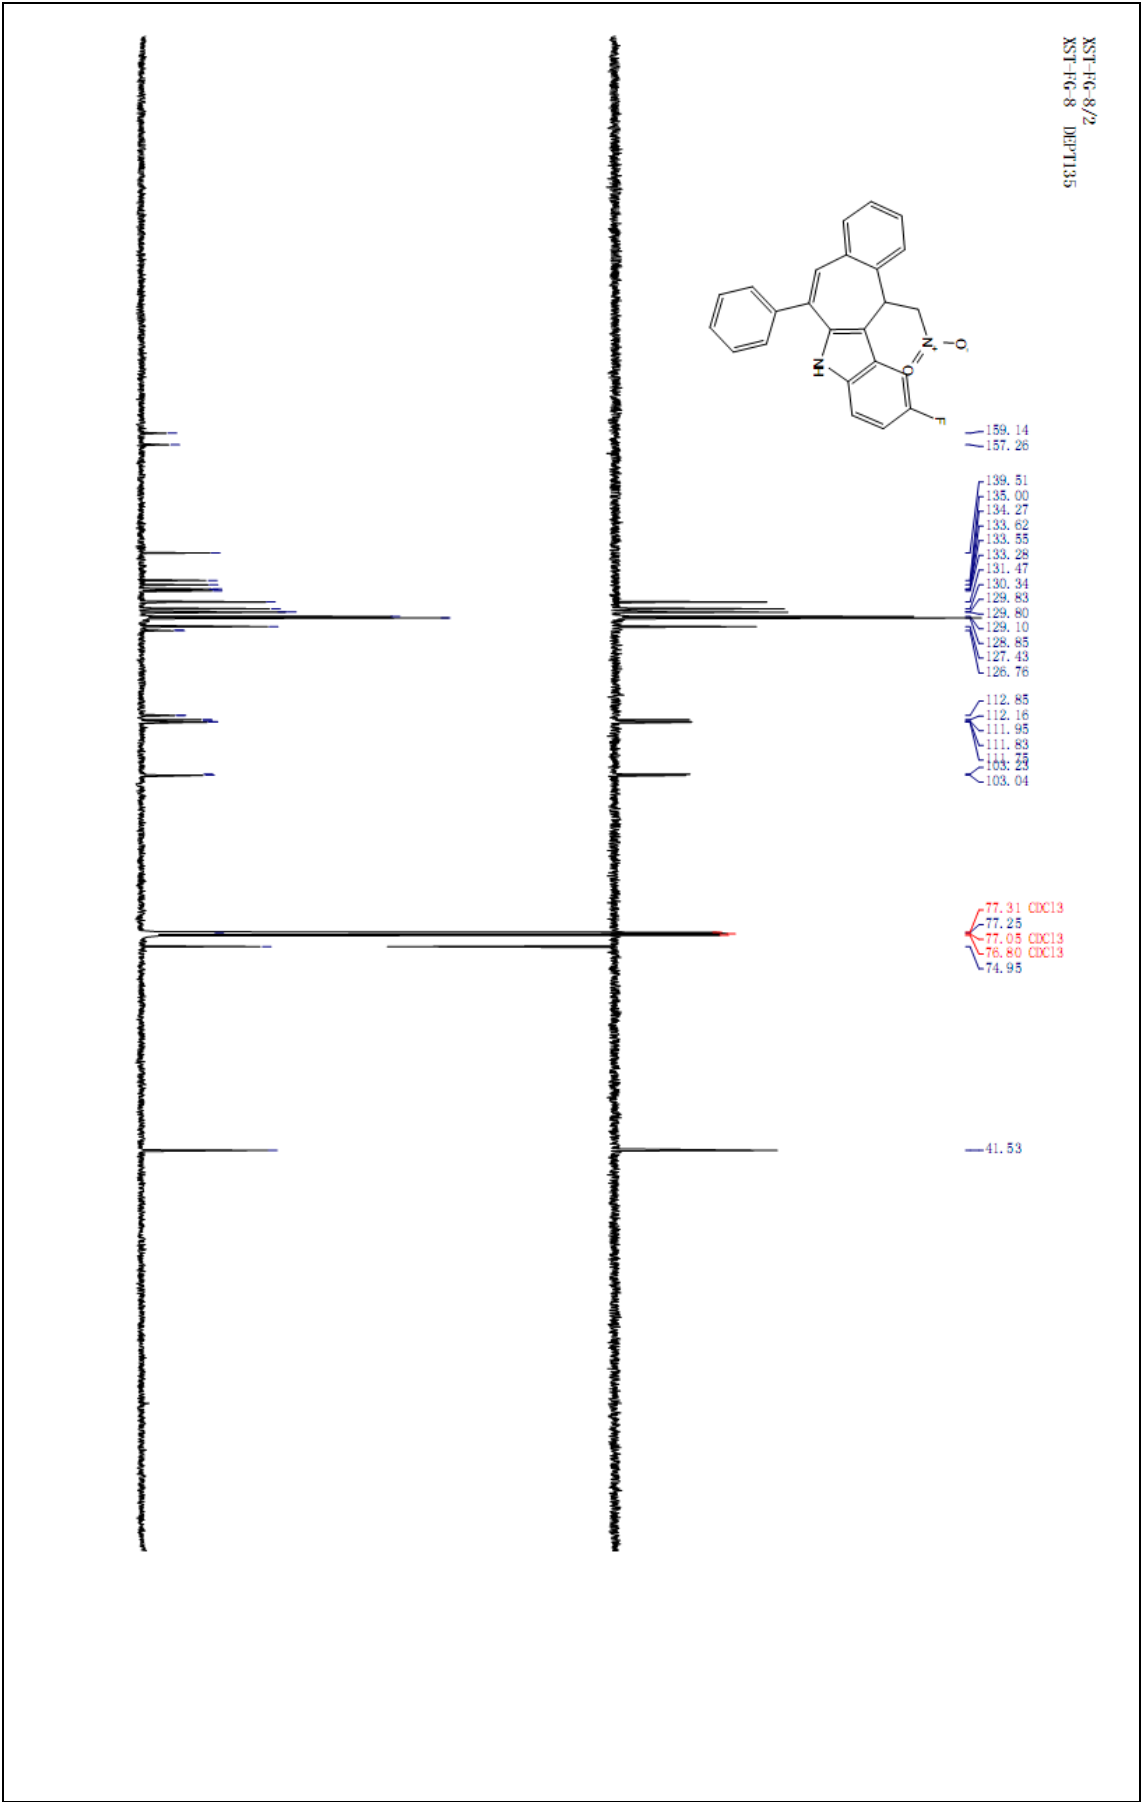



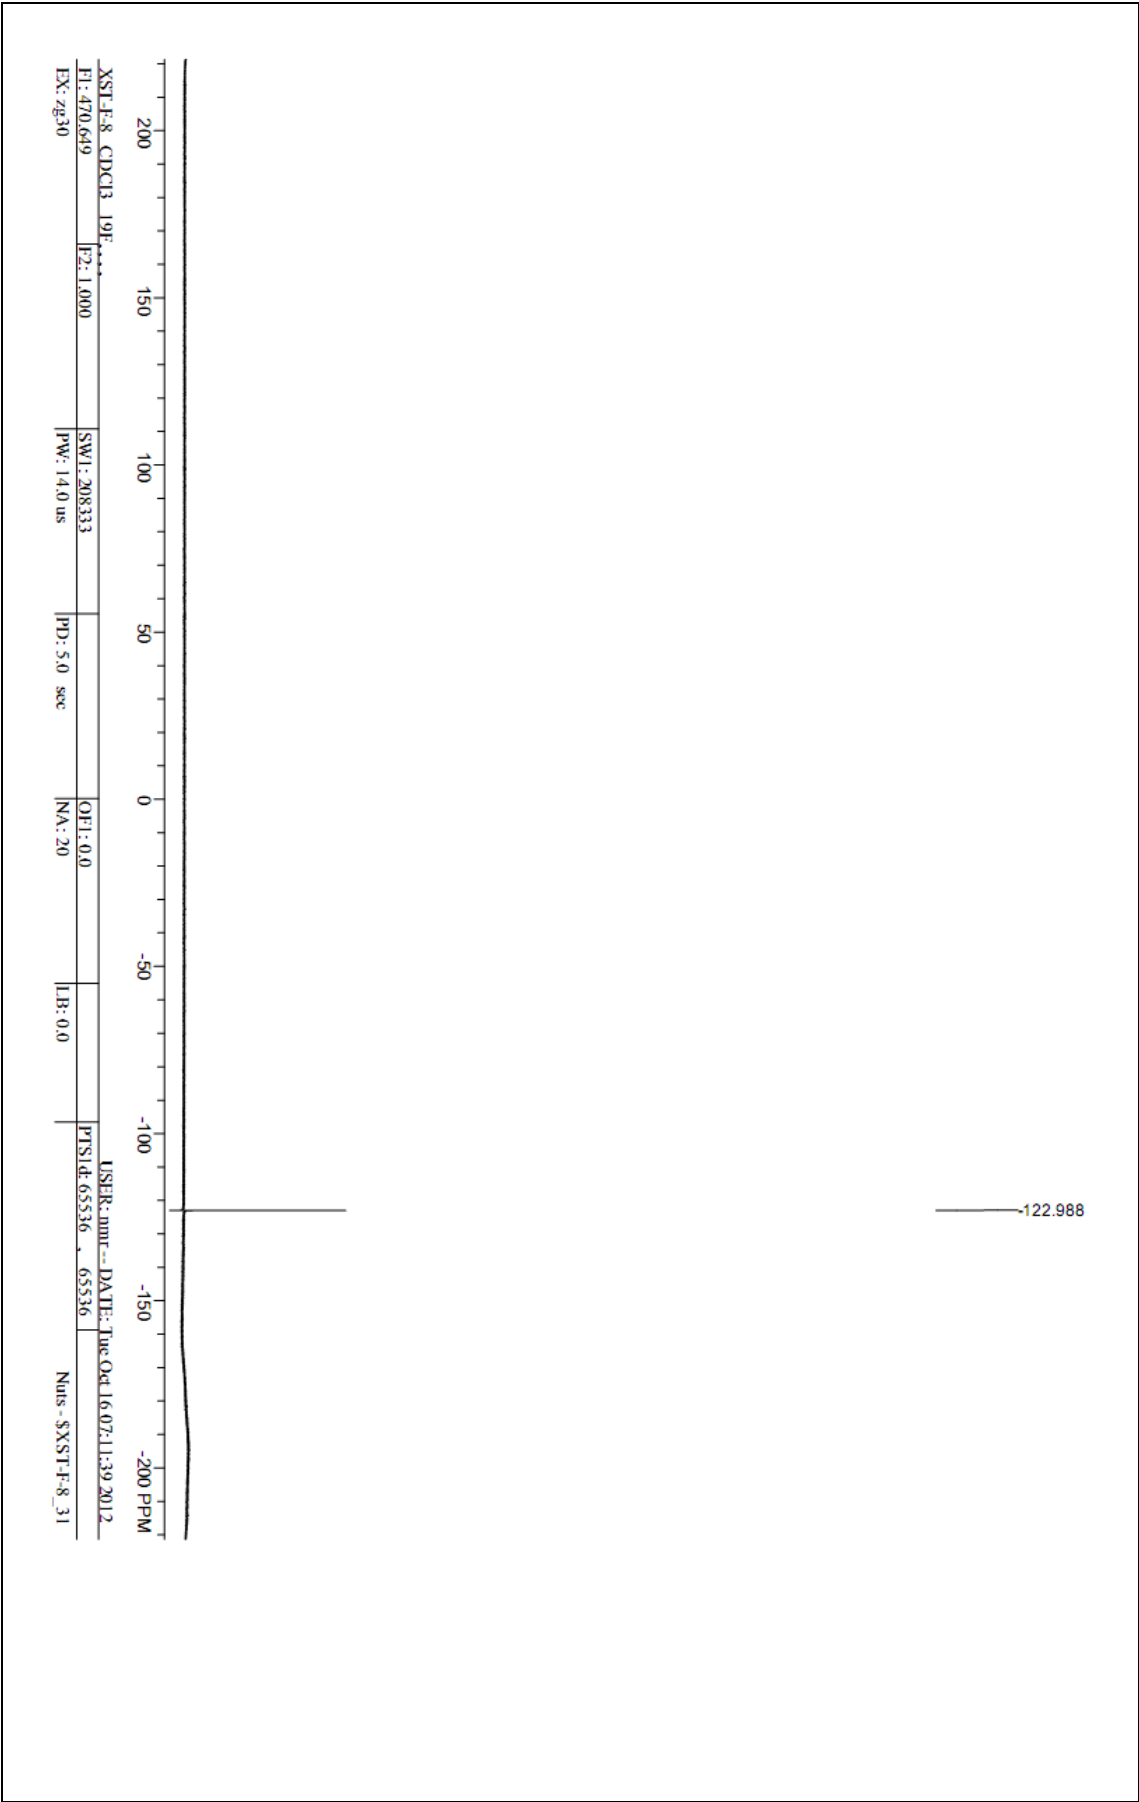

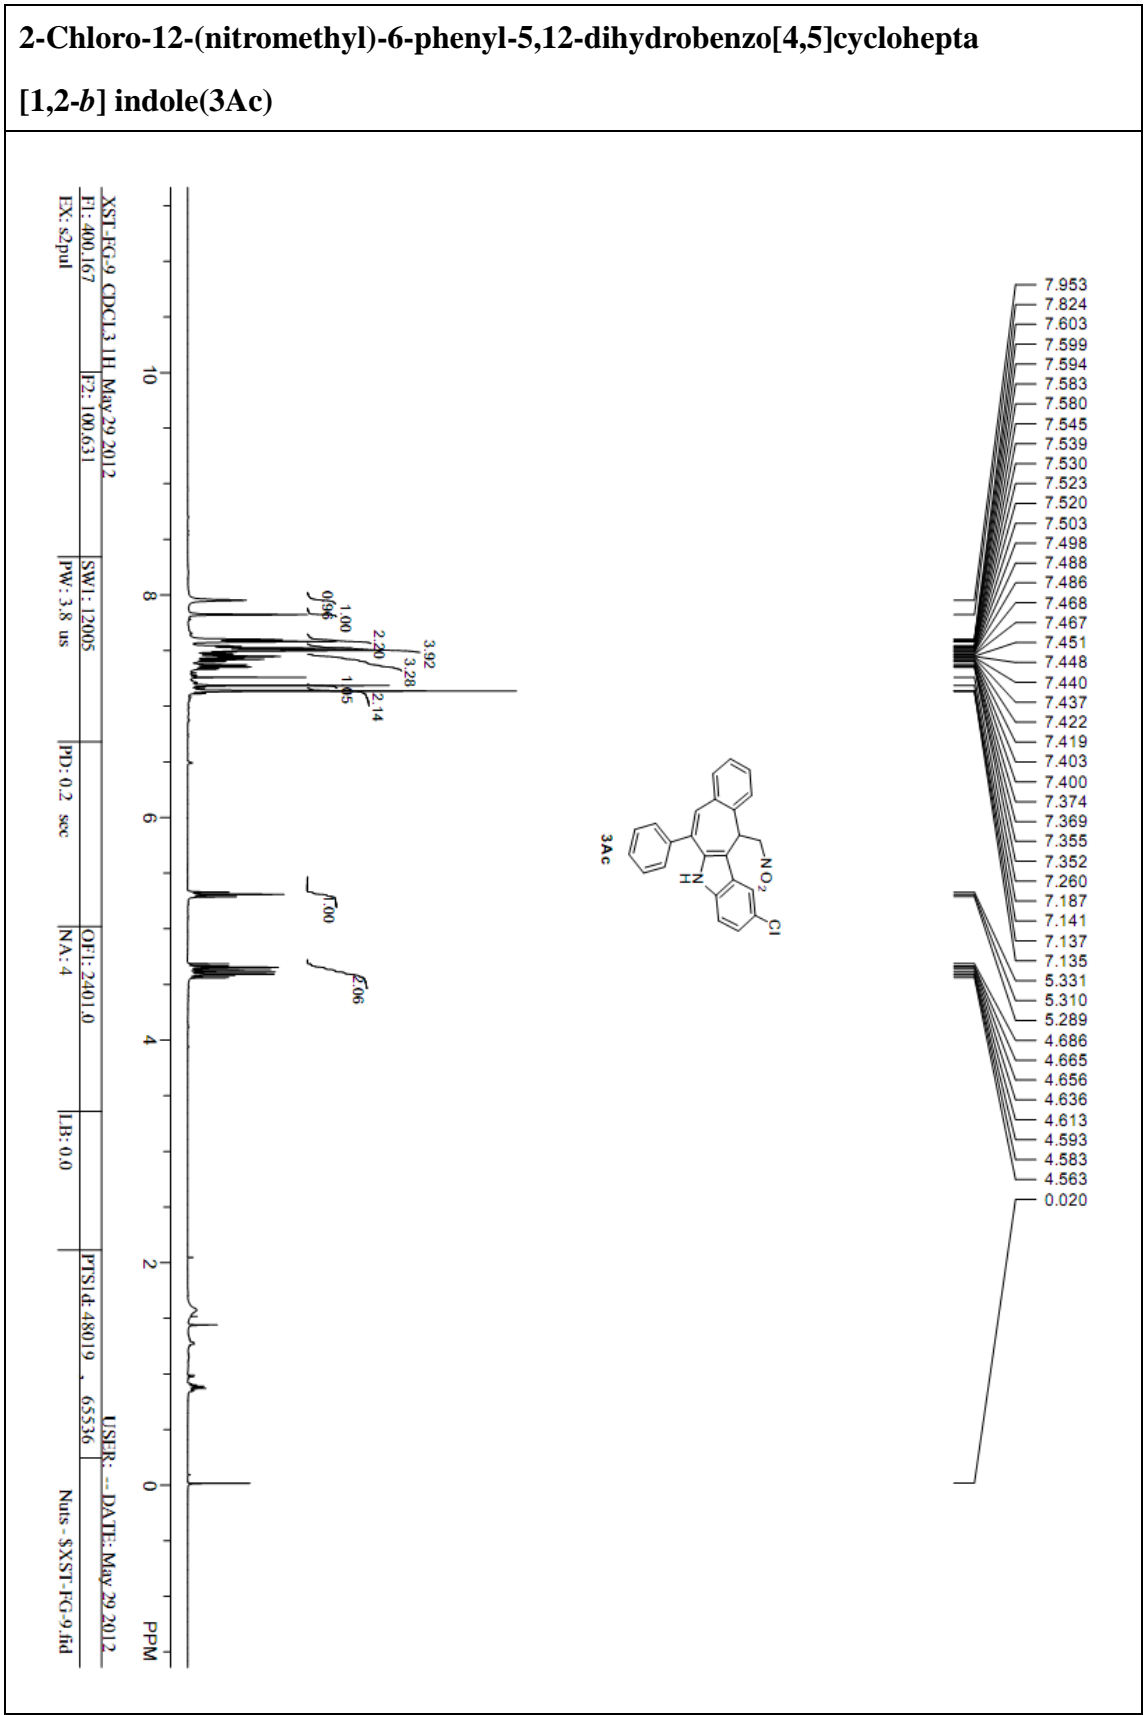

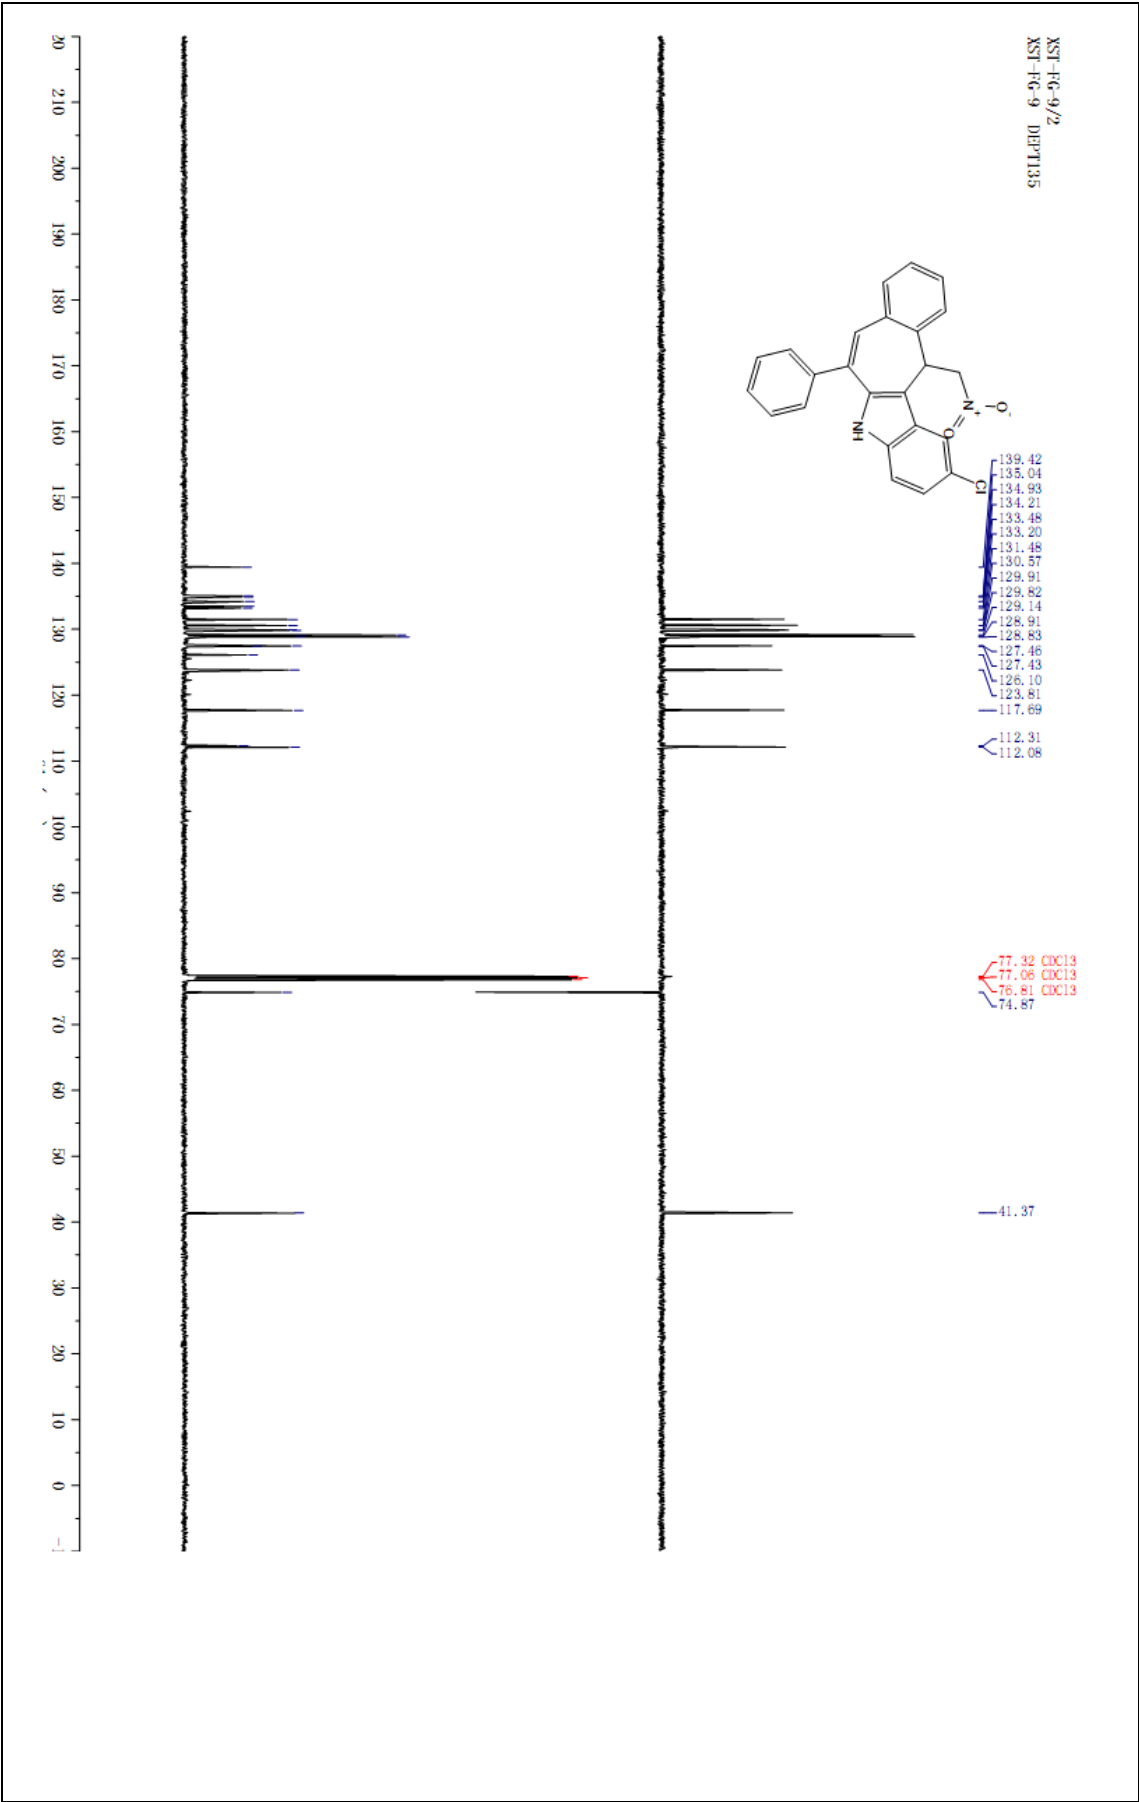





**2-Methoxy-12-(nitromethyl)-6-phenyl-5,12-dihydrobenzo[4,5]cyclohepta  
[1,2-*b*] indole(3Ae)**

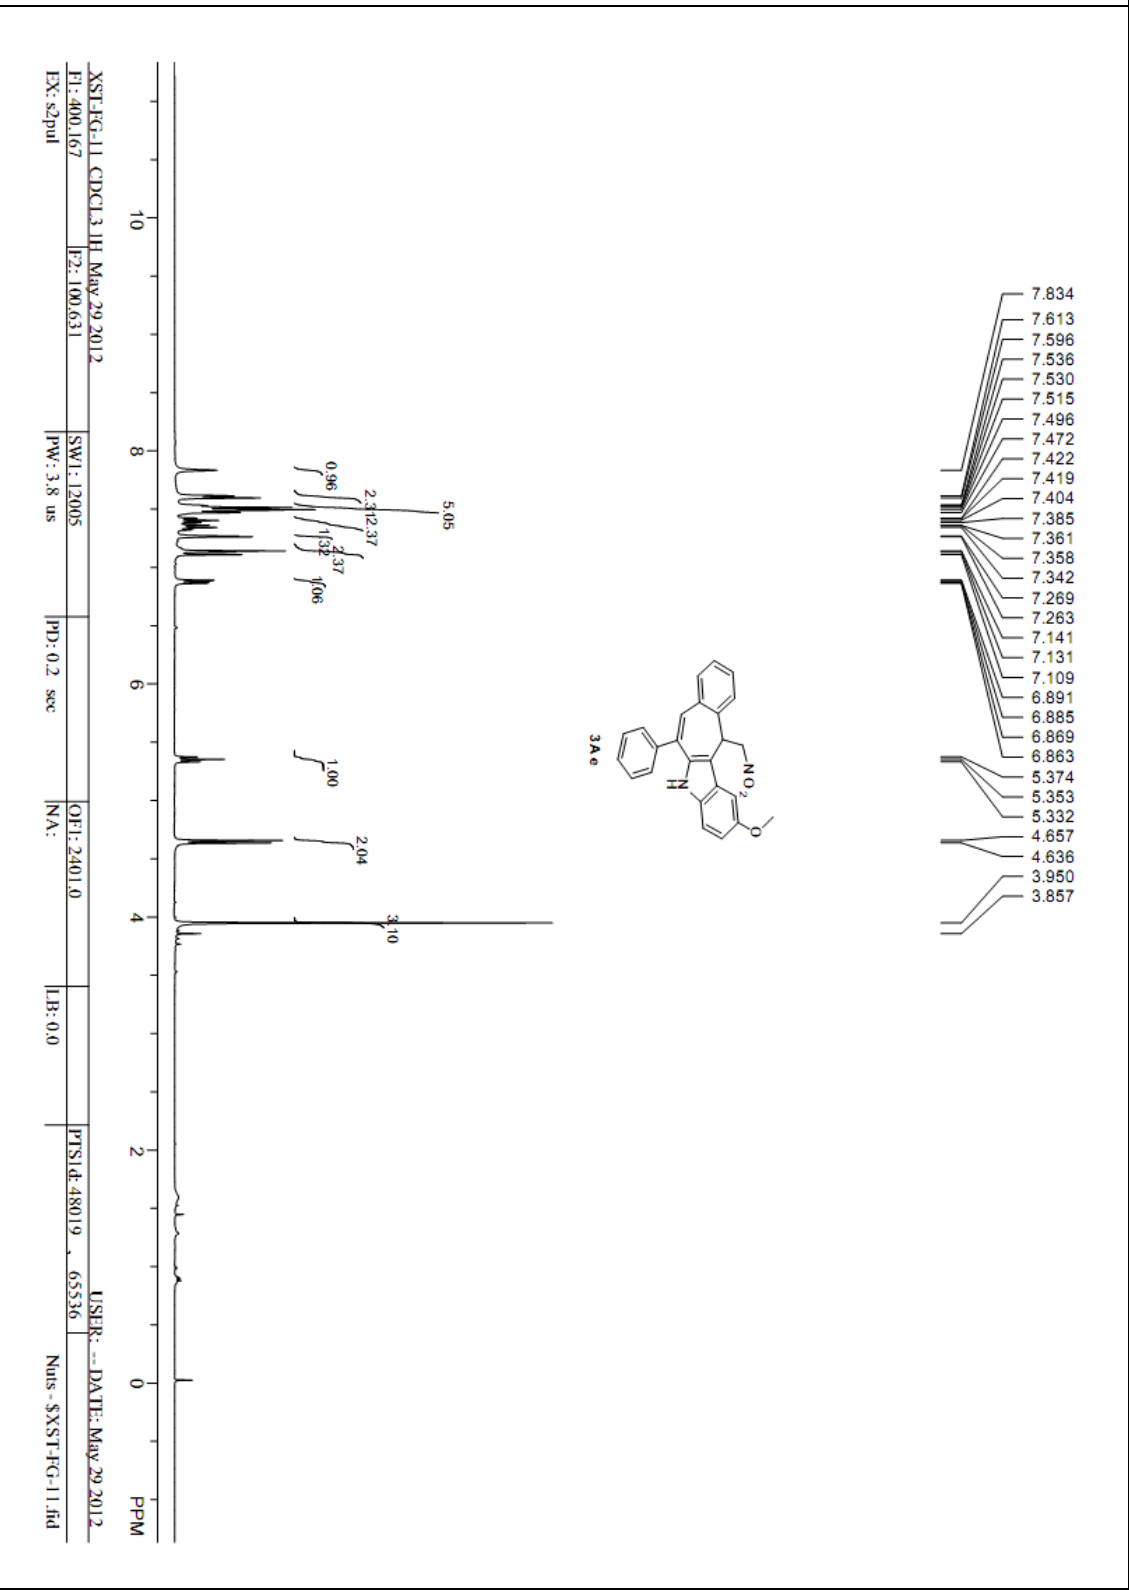

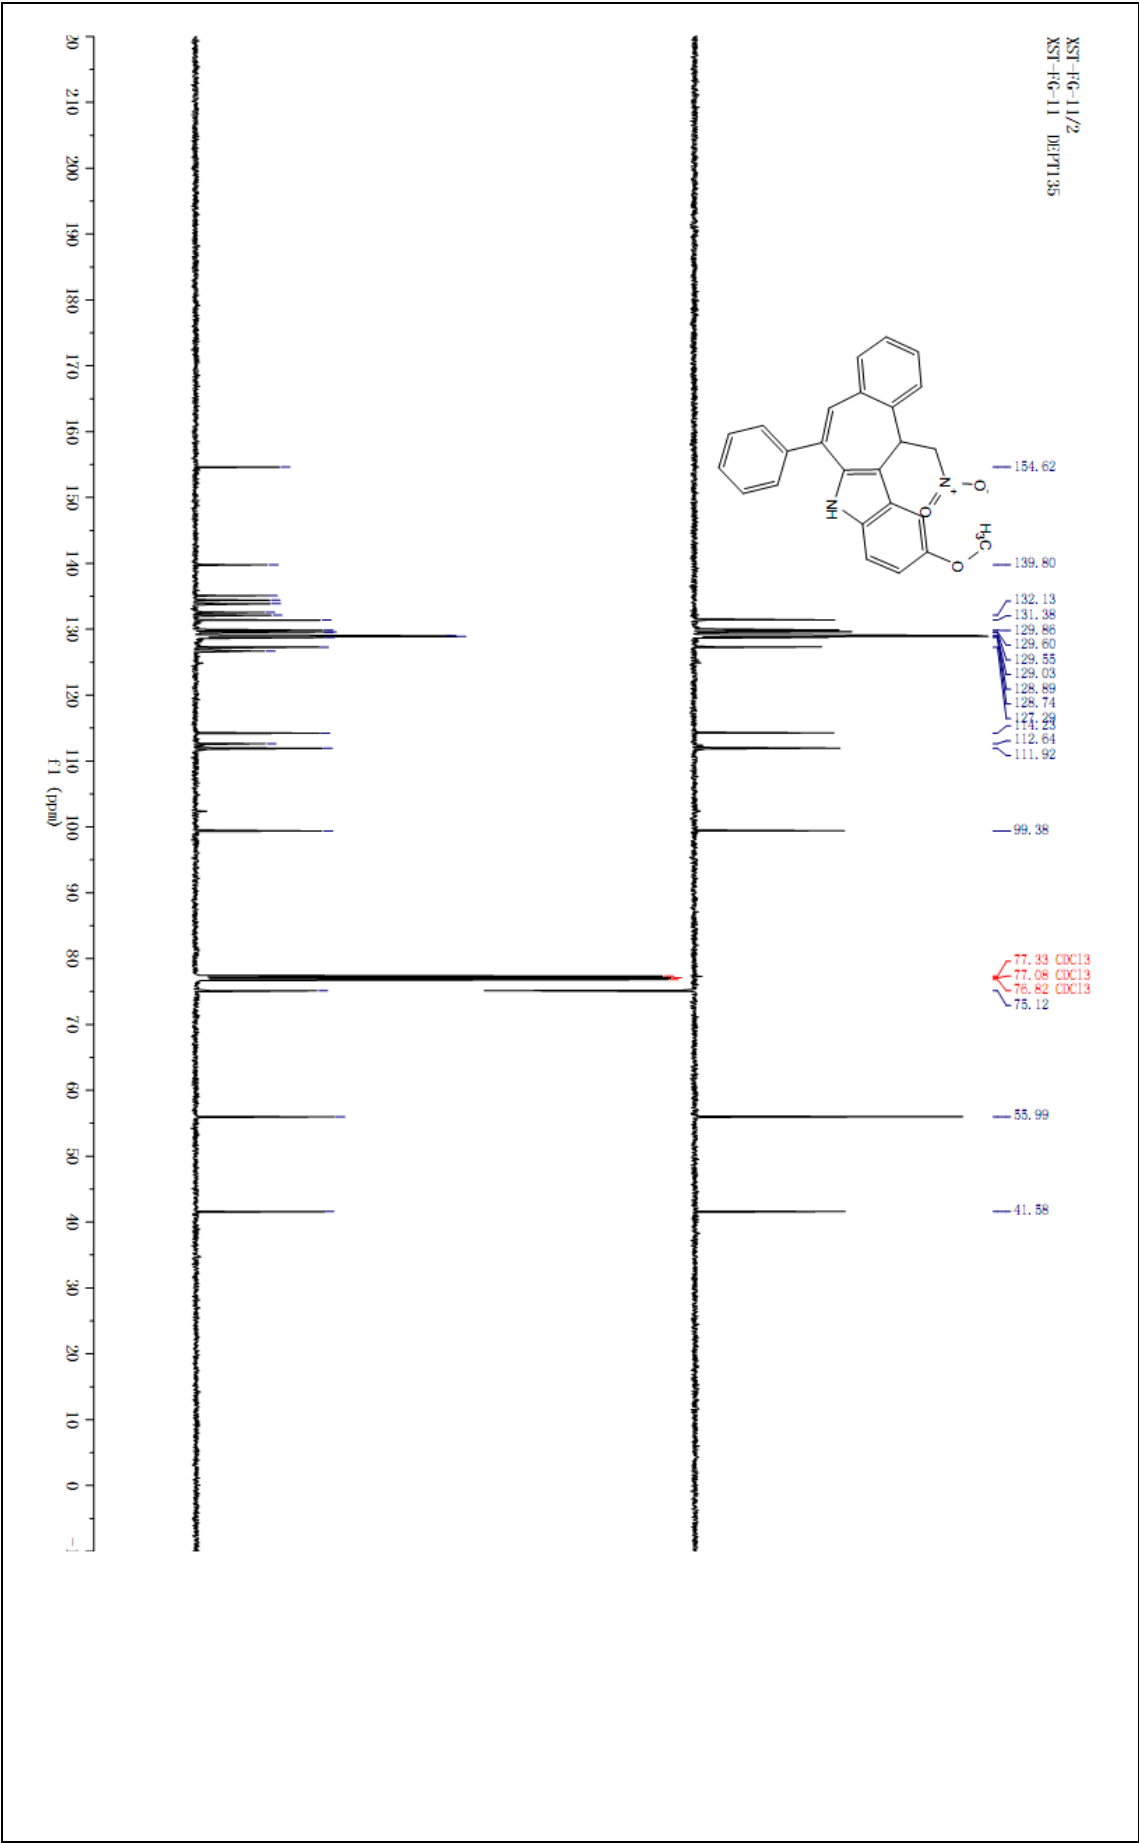





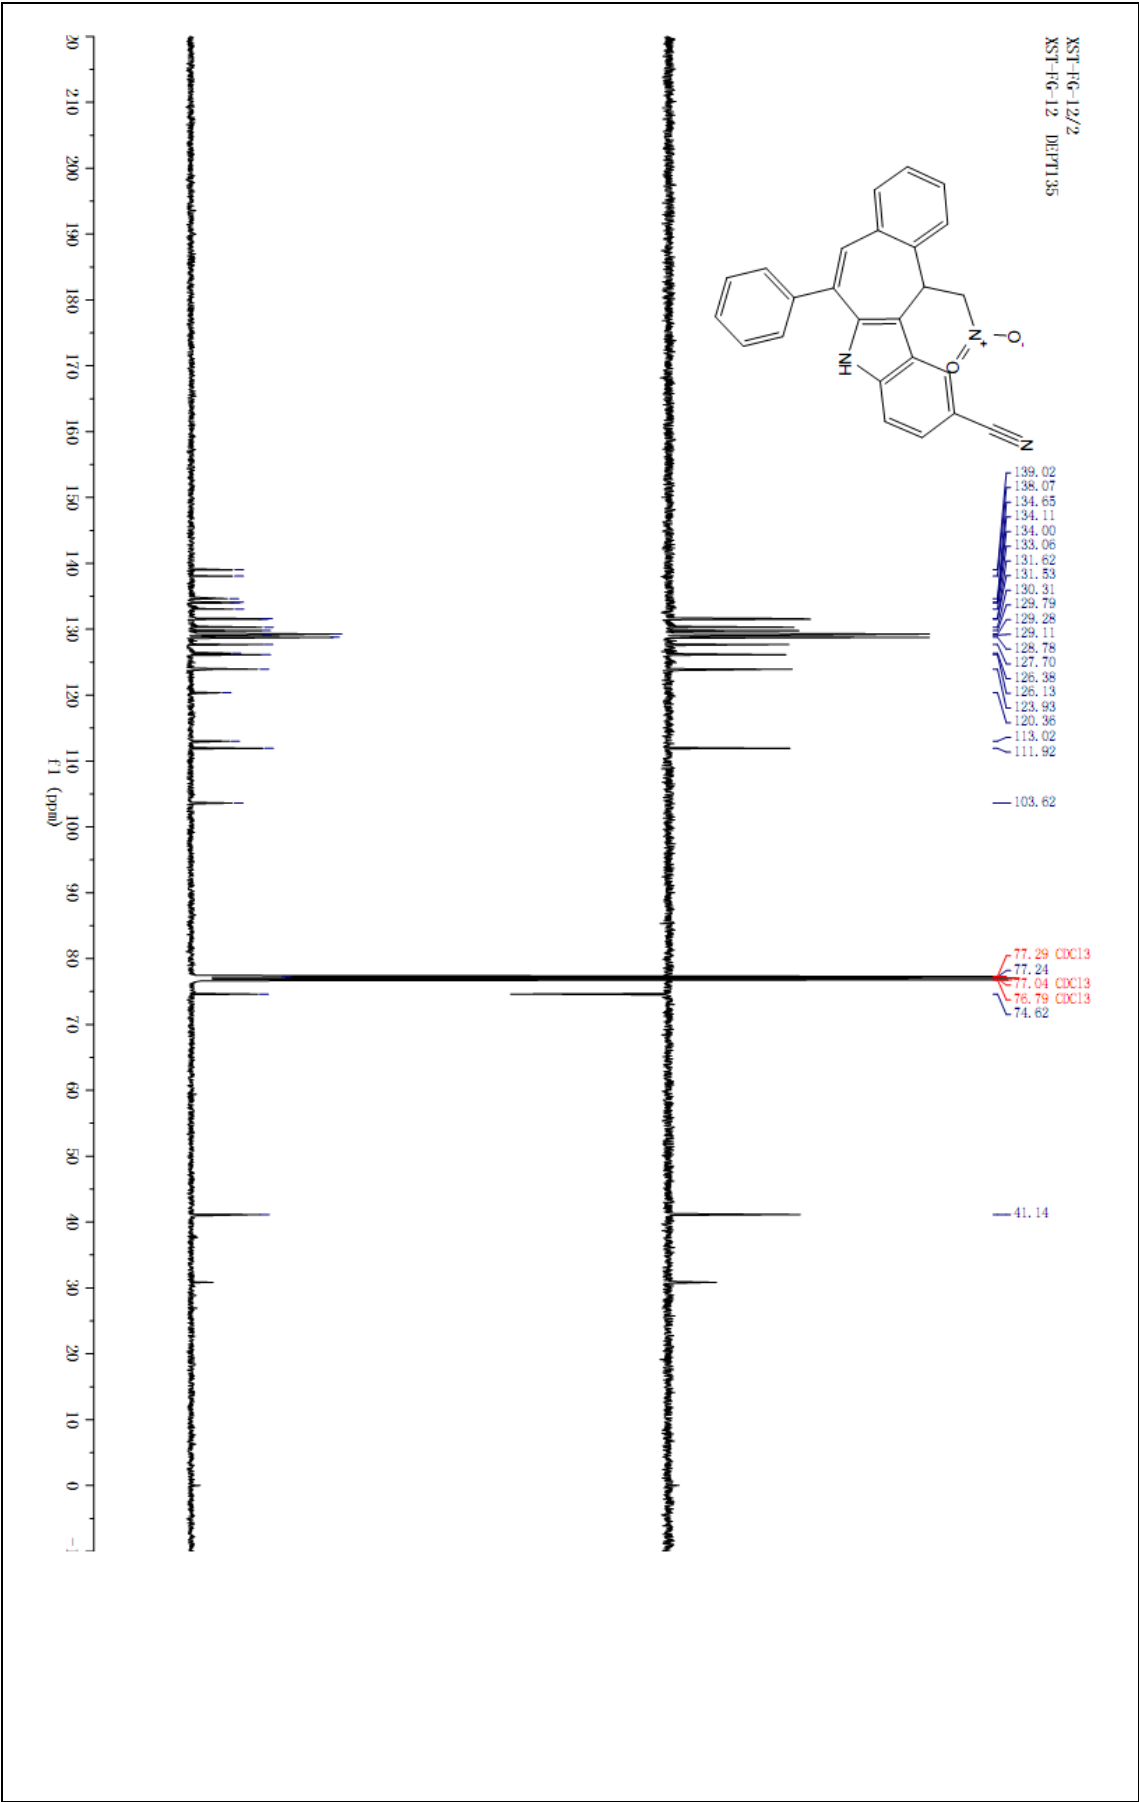



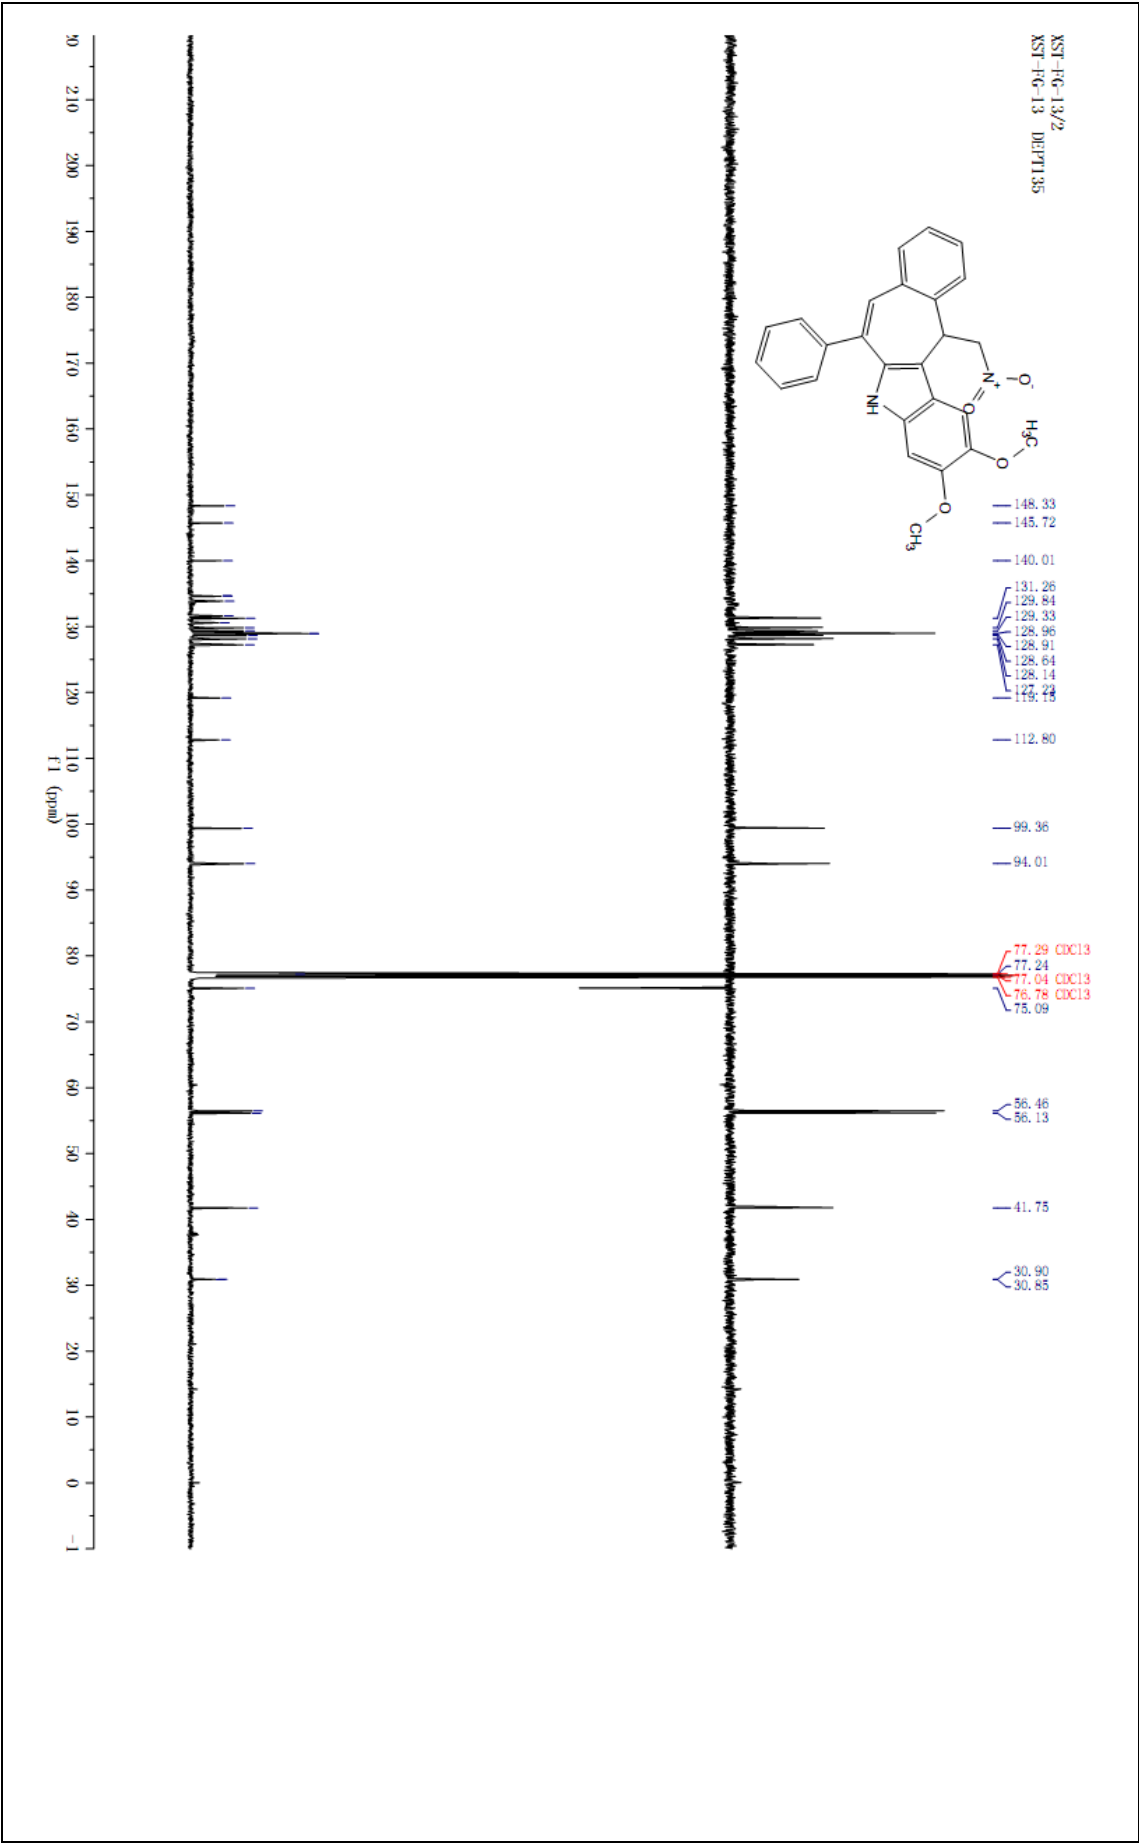

**4-Methyl-12-(nitromethyl)-6-phenyl-5,12-dihydrobenzo[4,5]cyclohepta  
[1,2-*b*] indole(3Ah)**

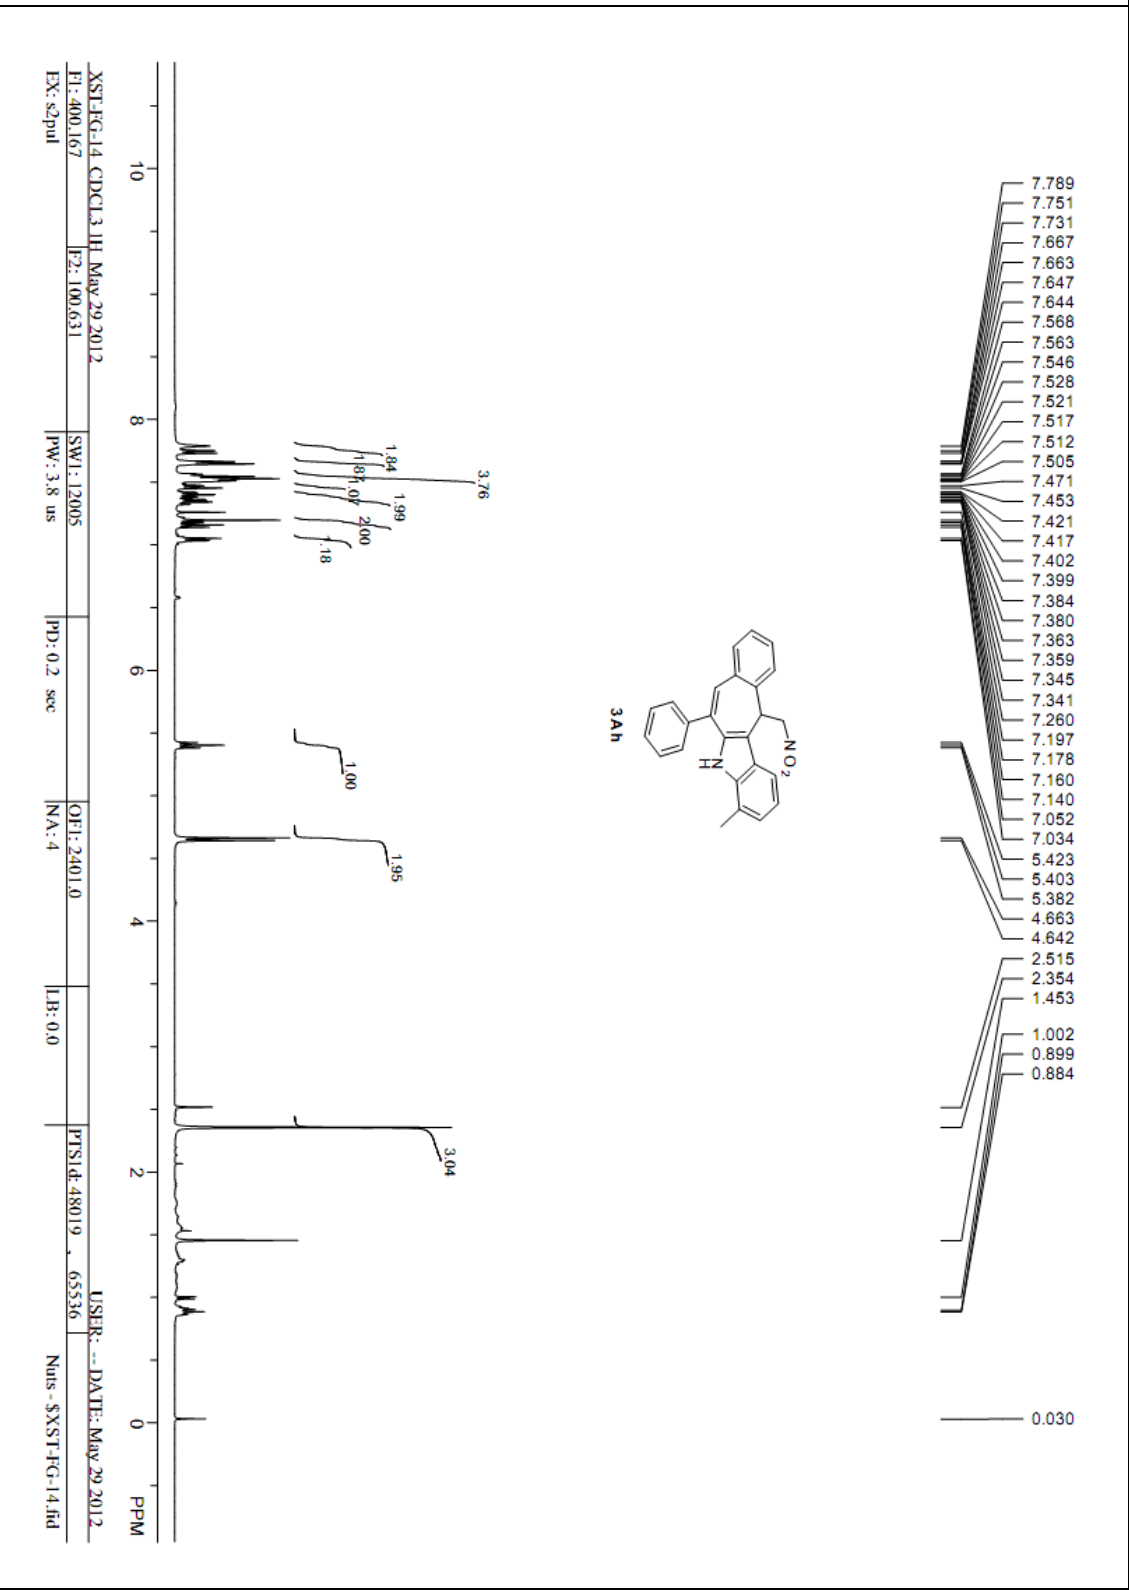

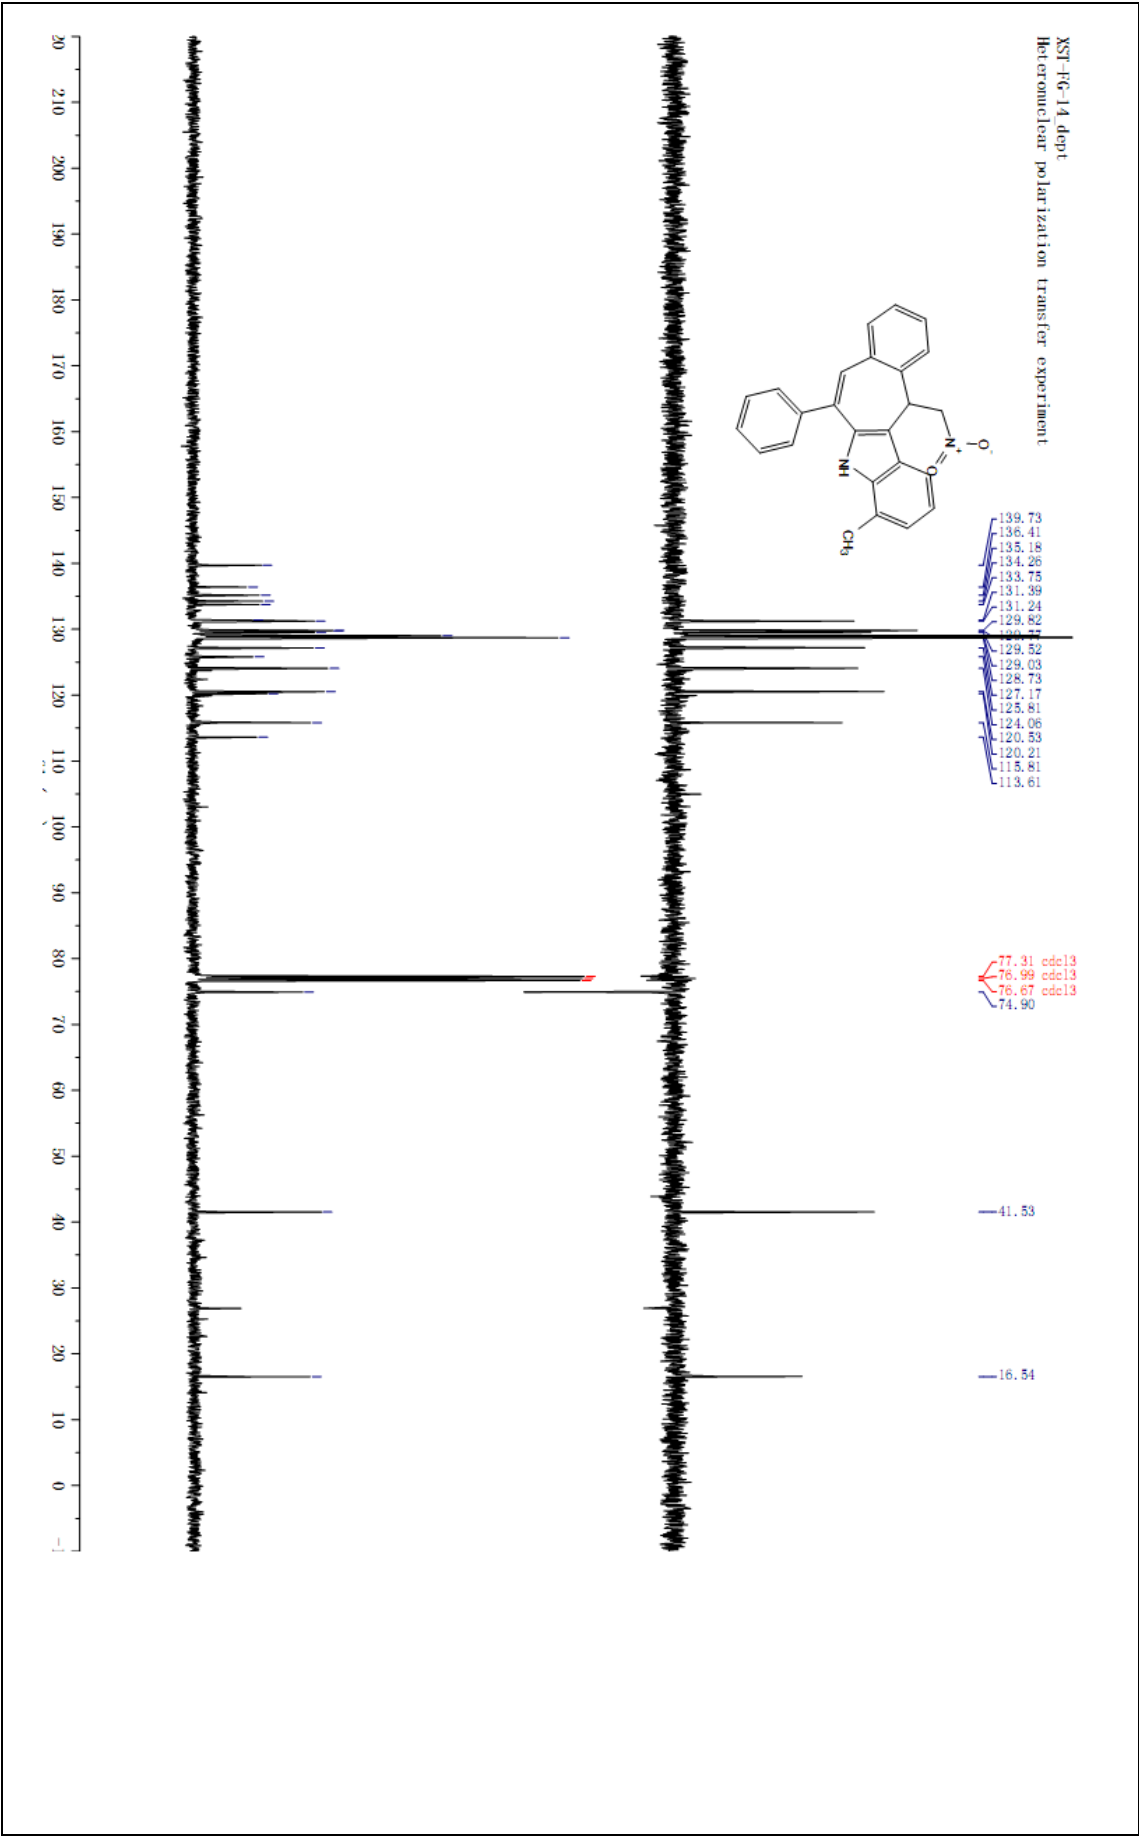

**12-(Nitromethyl)-6-(thiophen-3-yl)-5,12-dihydrobenzo[4,5]cyclohepta[1,2-*b*]  
indole(3Ia)**

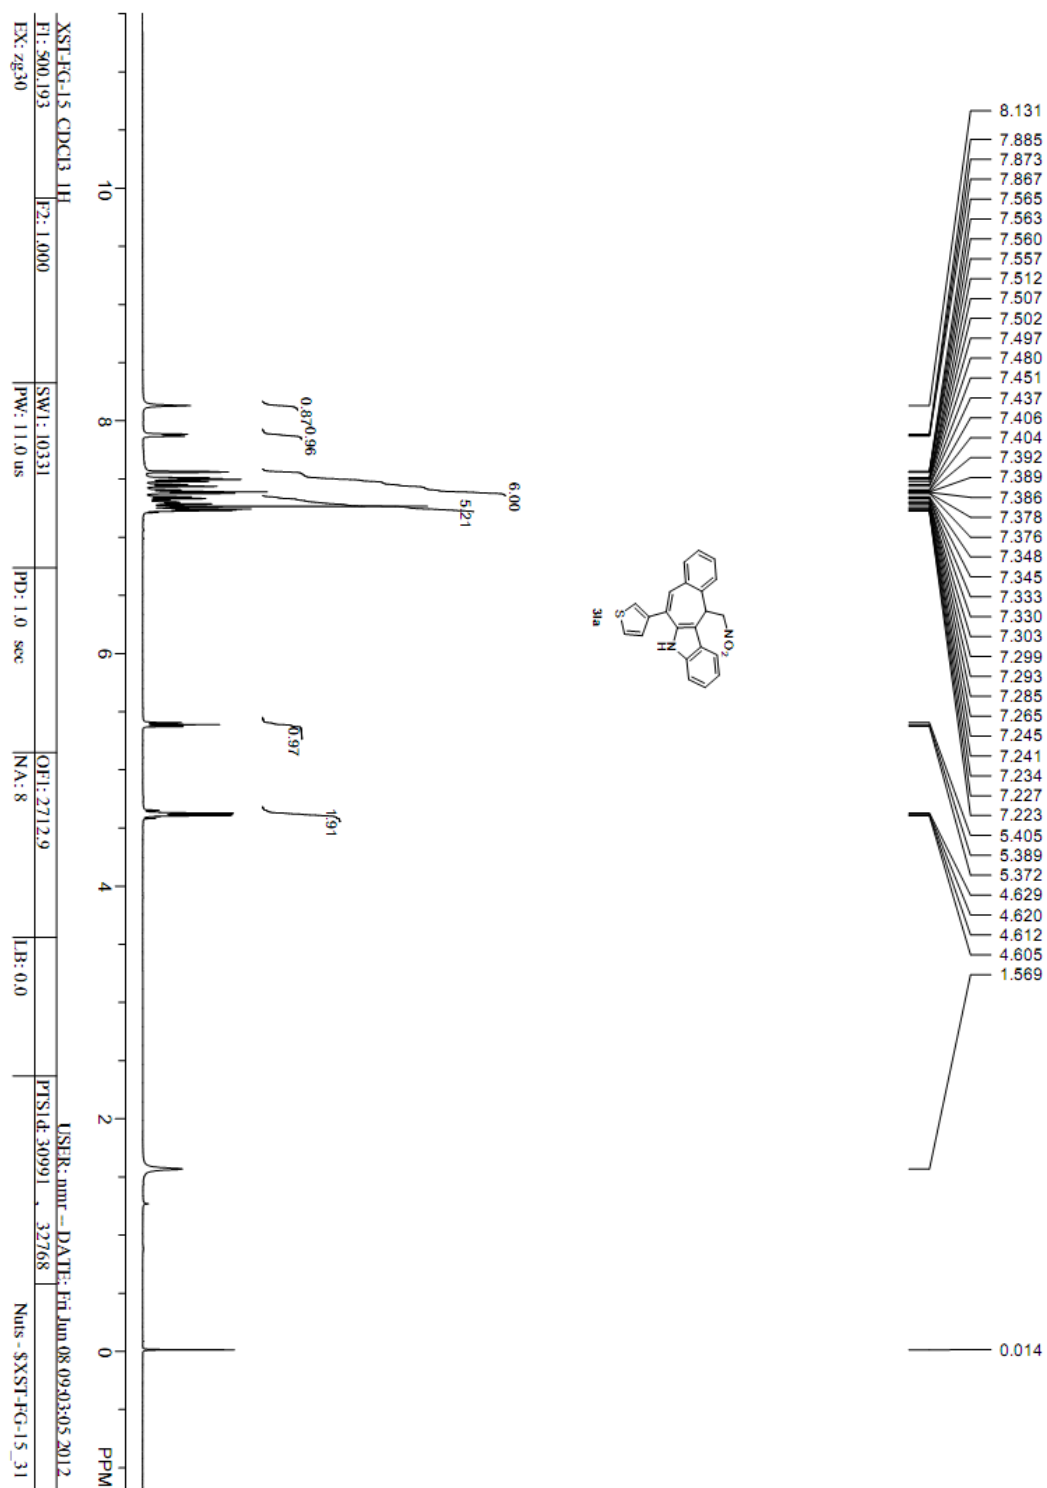

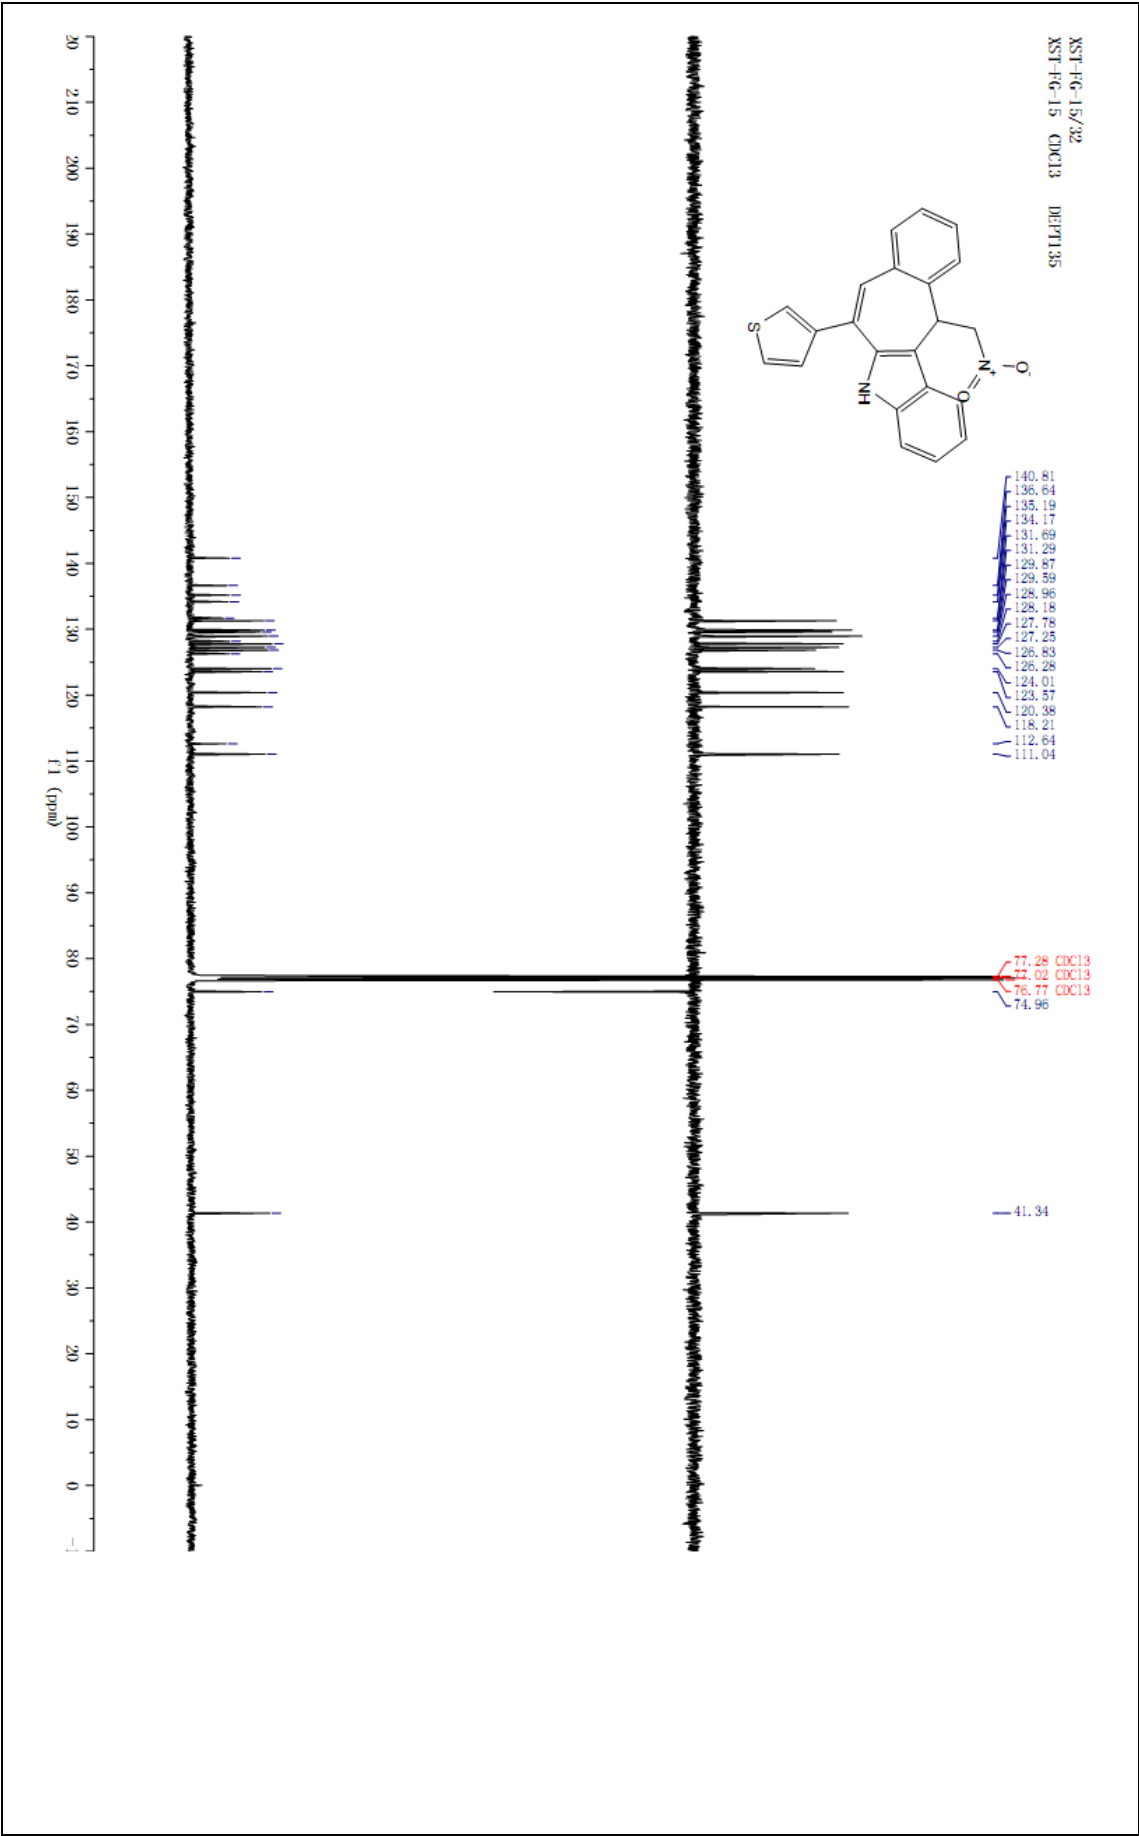

**12-(Nitromethyl)-6-cyclopentyl-5,12-dihydrobenzo[4,5]cyclohepta[1,2-*b*]  
indole(3Ga)**

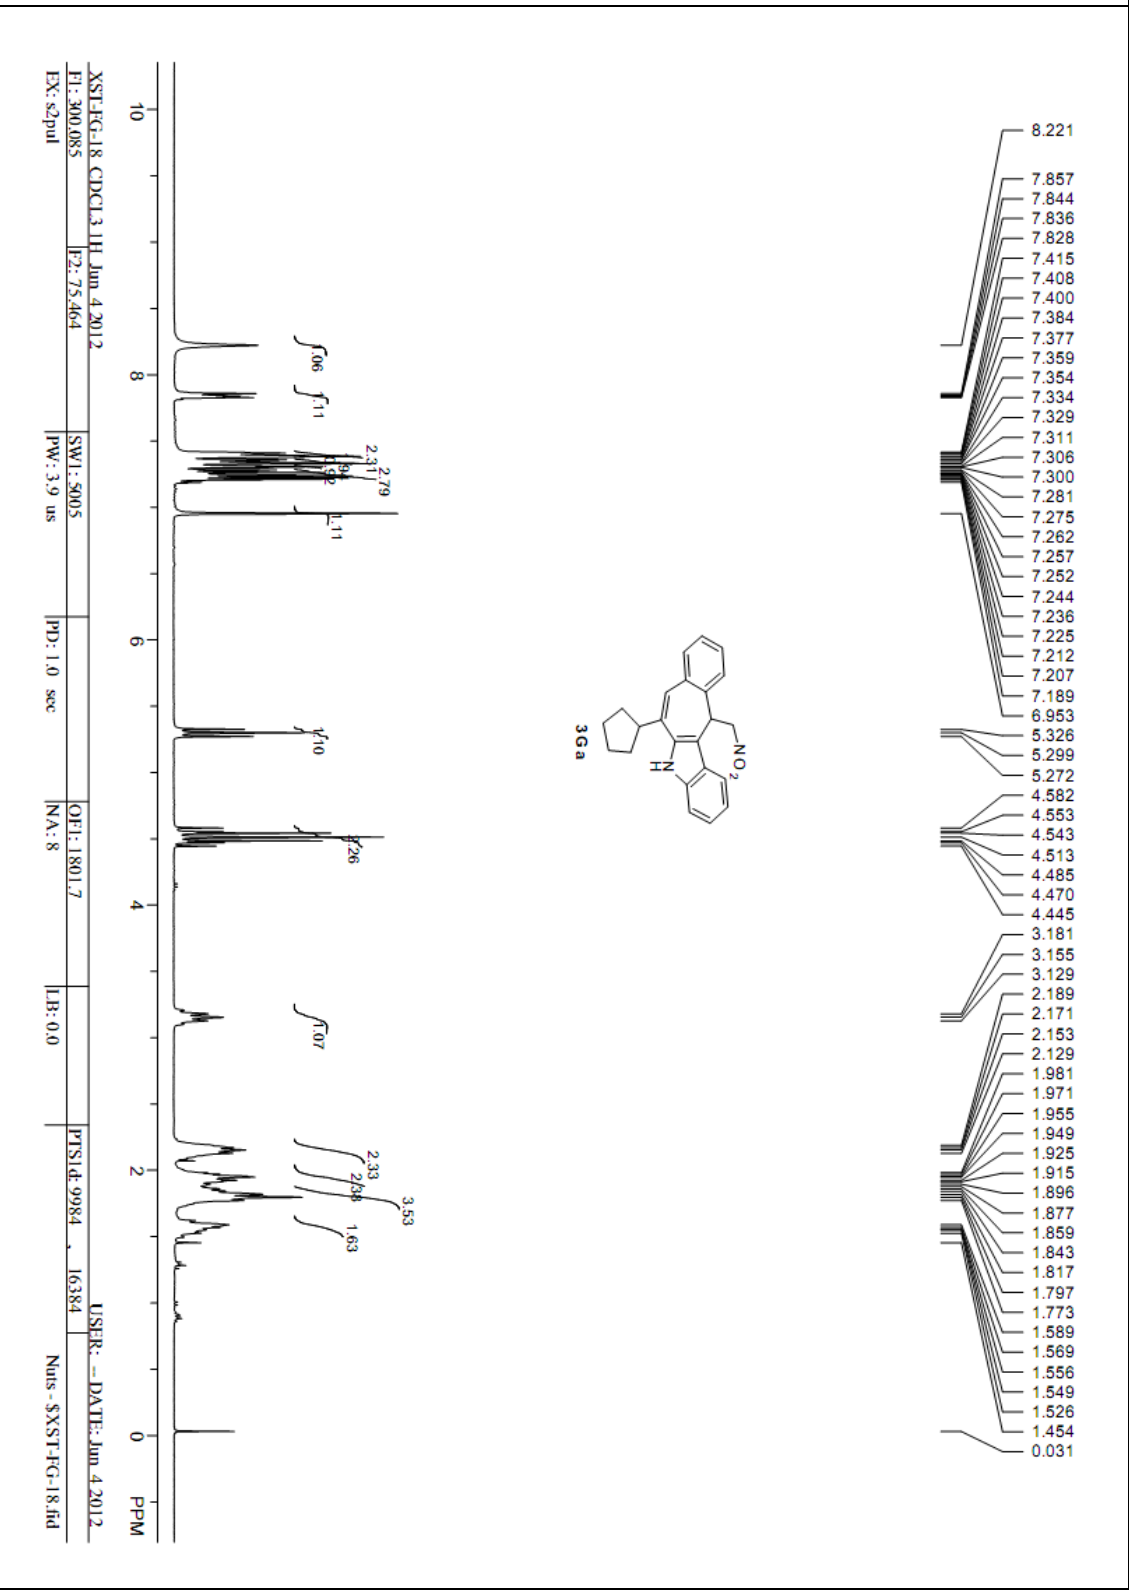







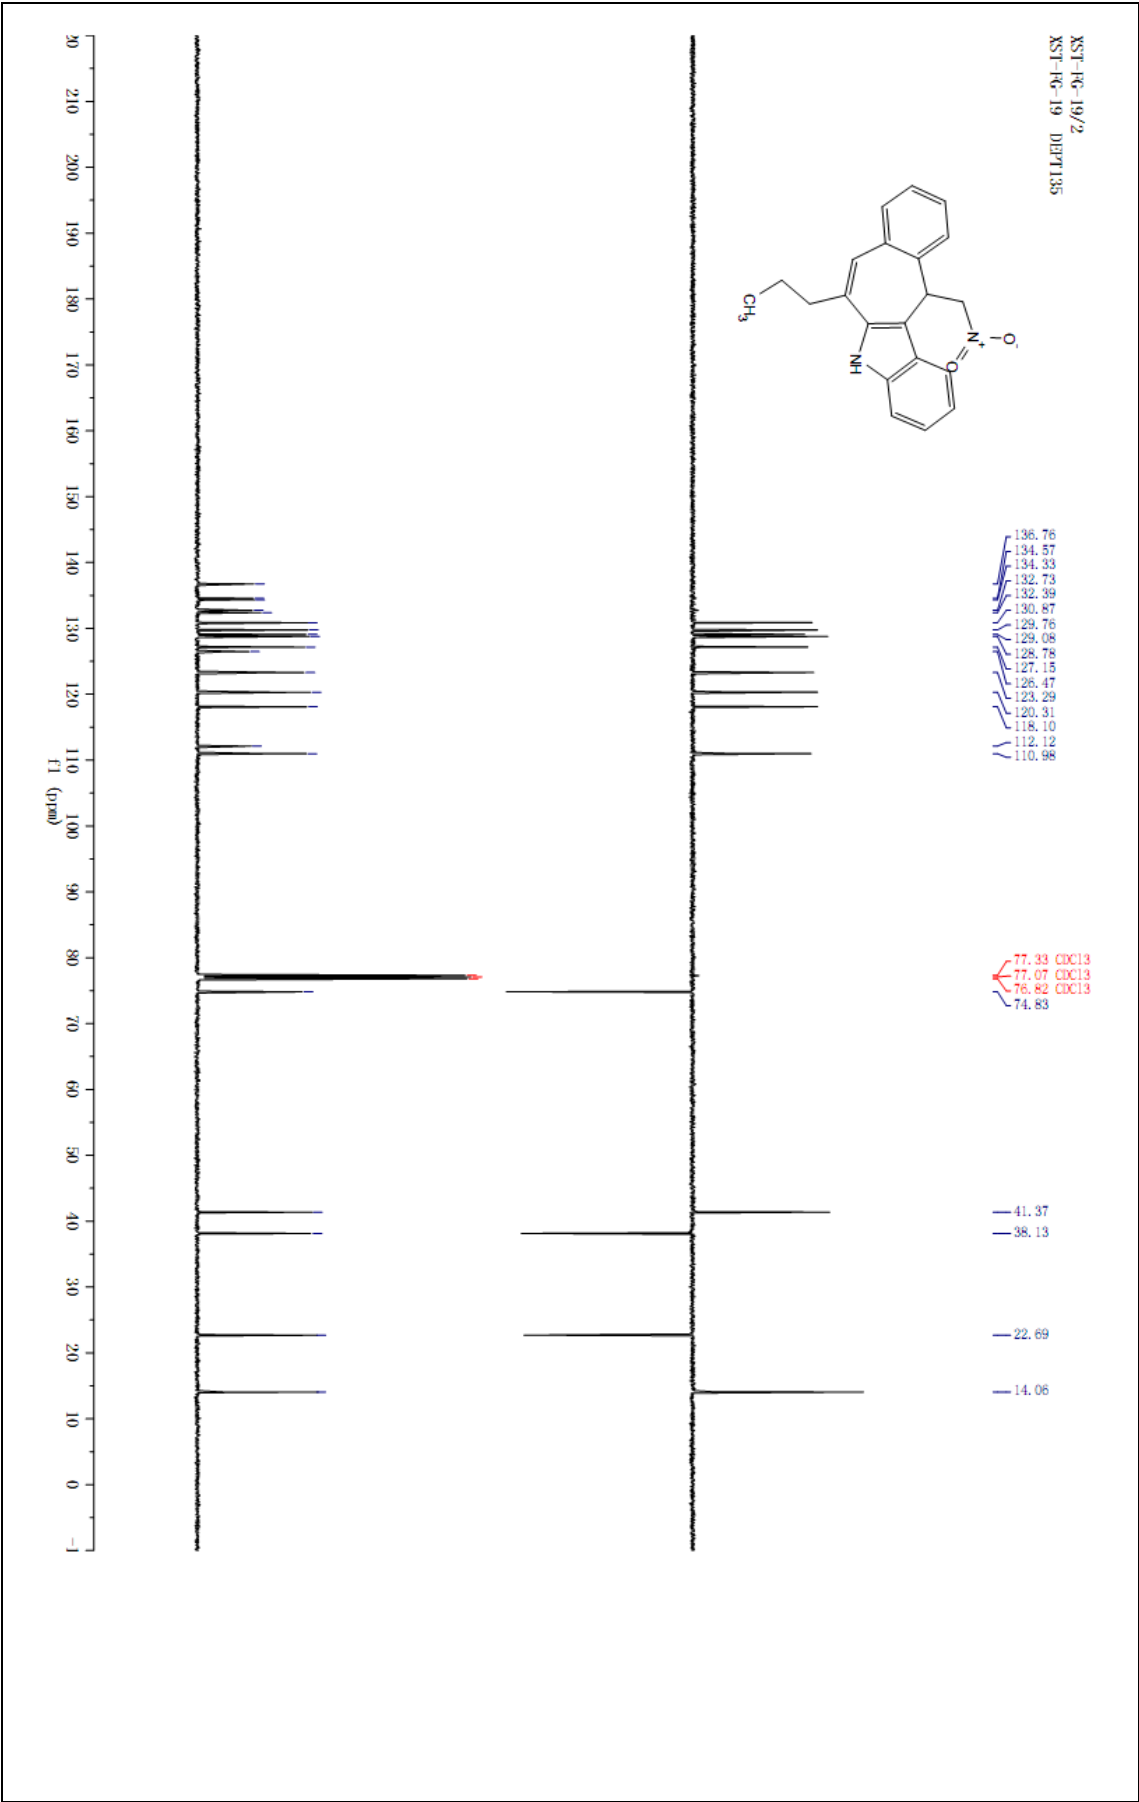

**10-Fluoro-12-(nitromethyl)-6-phenyl-5,12-dihydrobenzo[4,5]cyclohepta[1,2-*b*]  
indole (3Ja)**

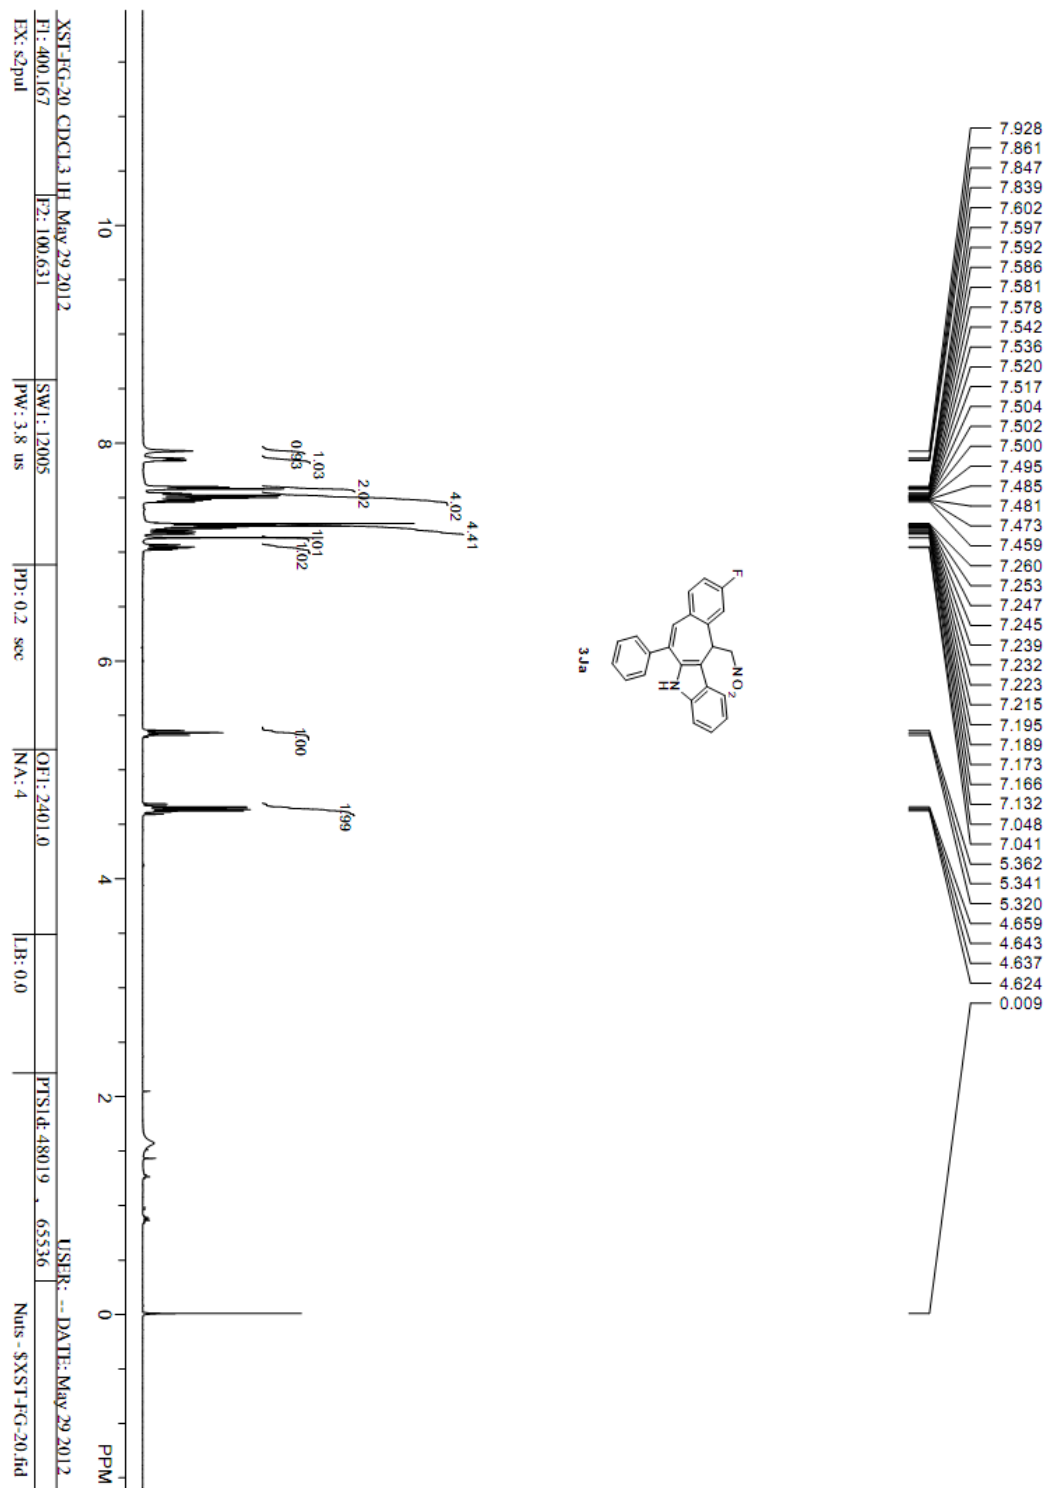

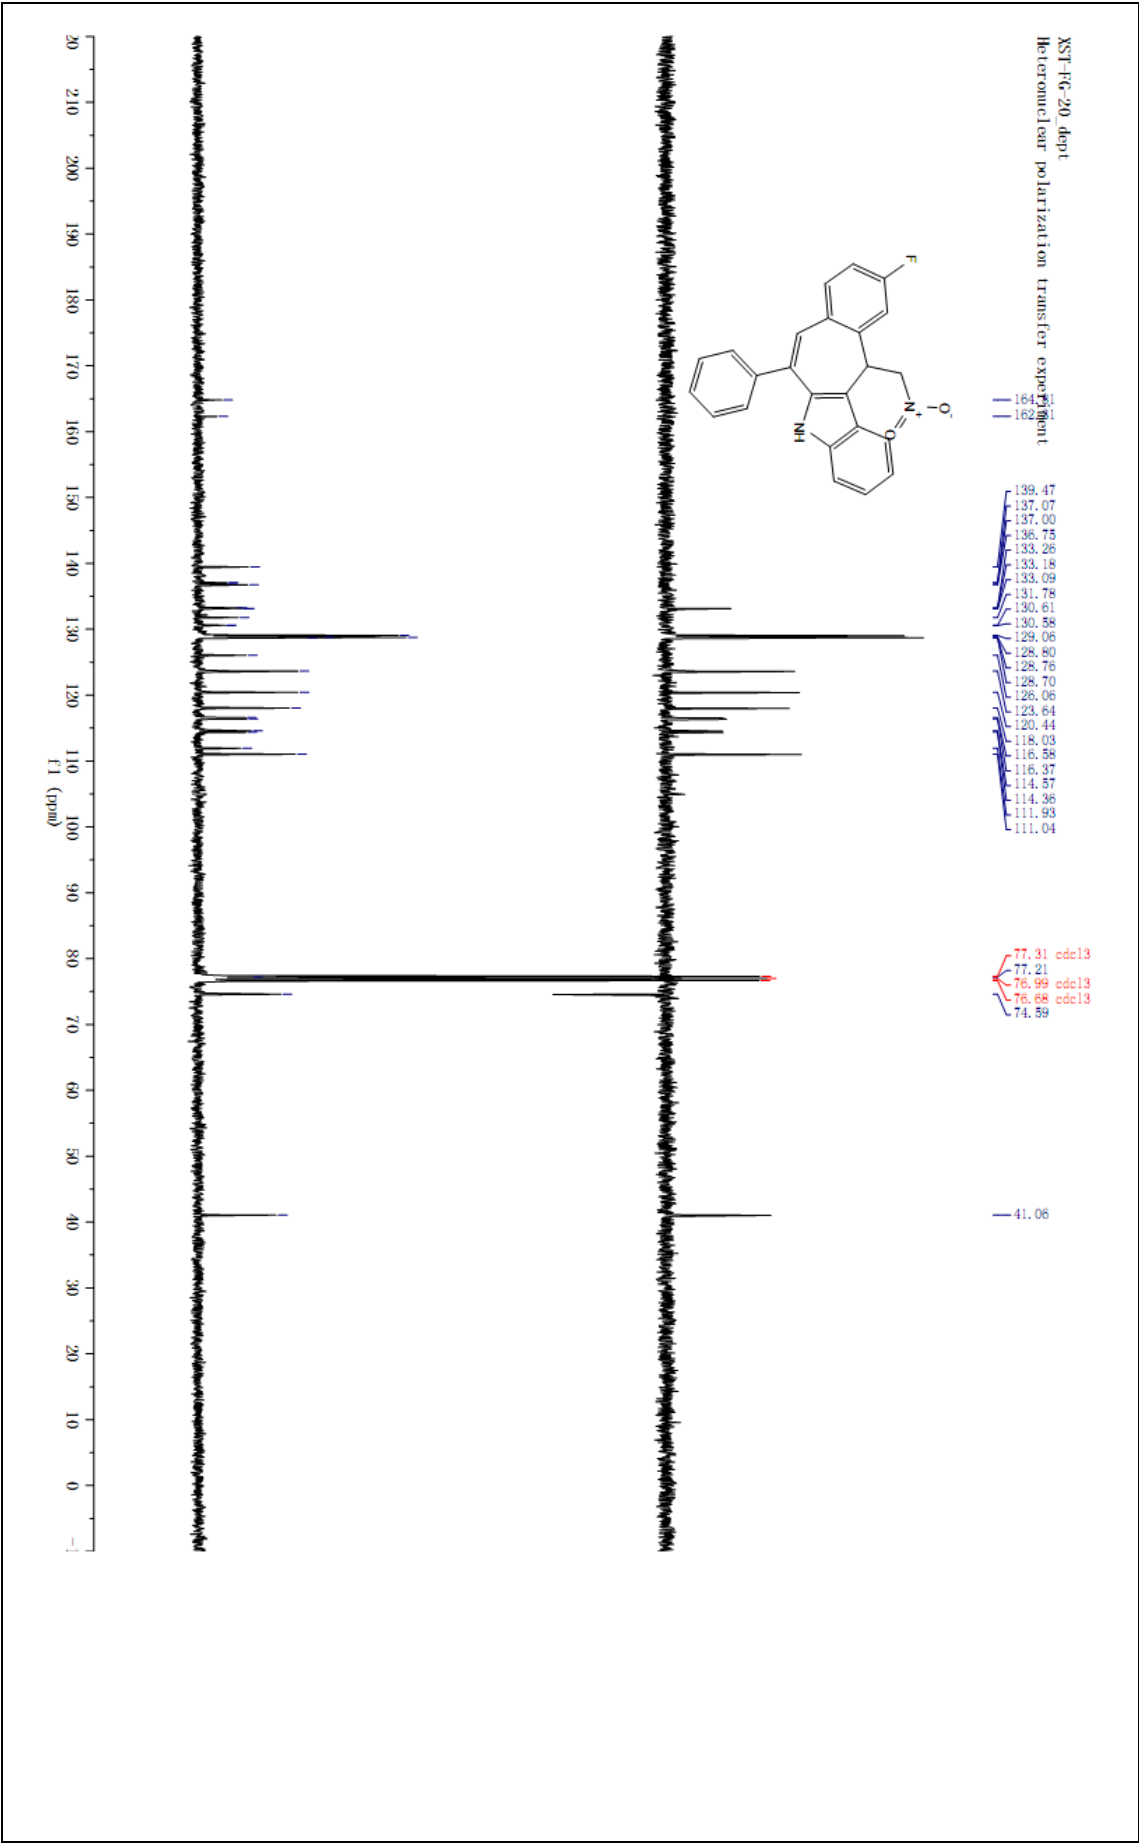

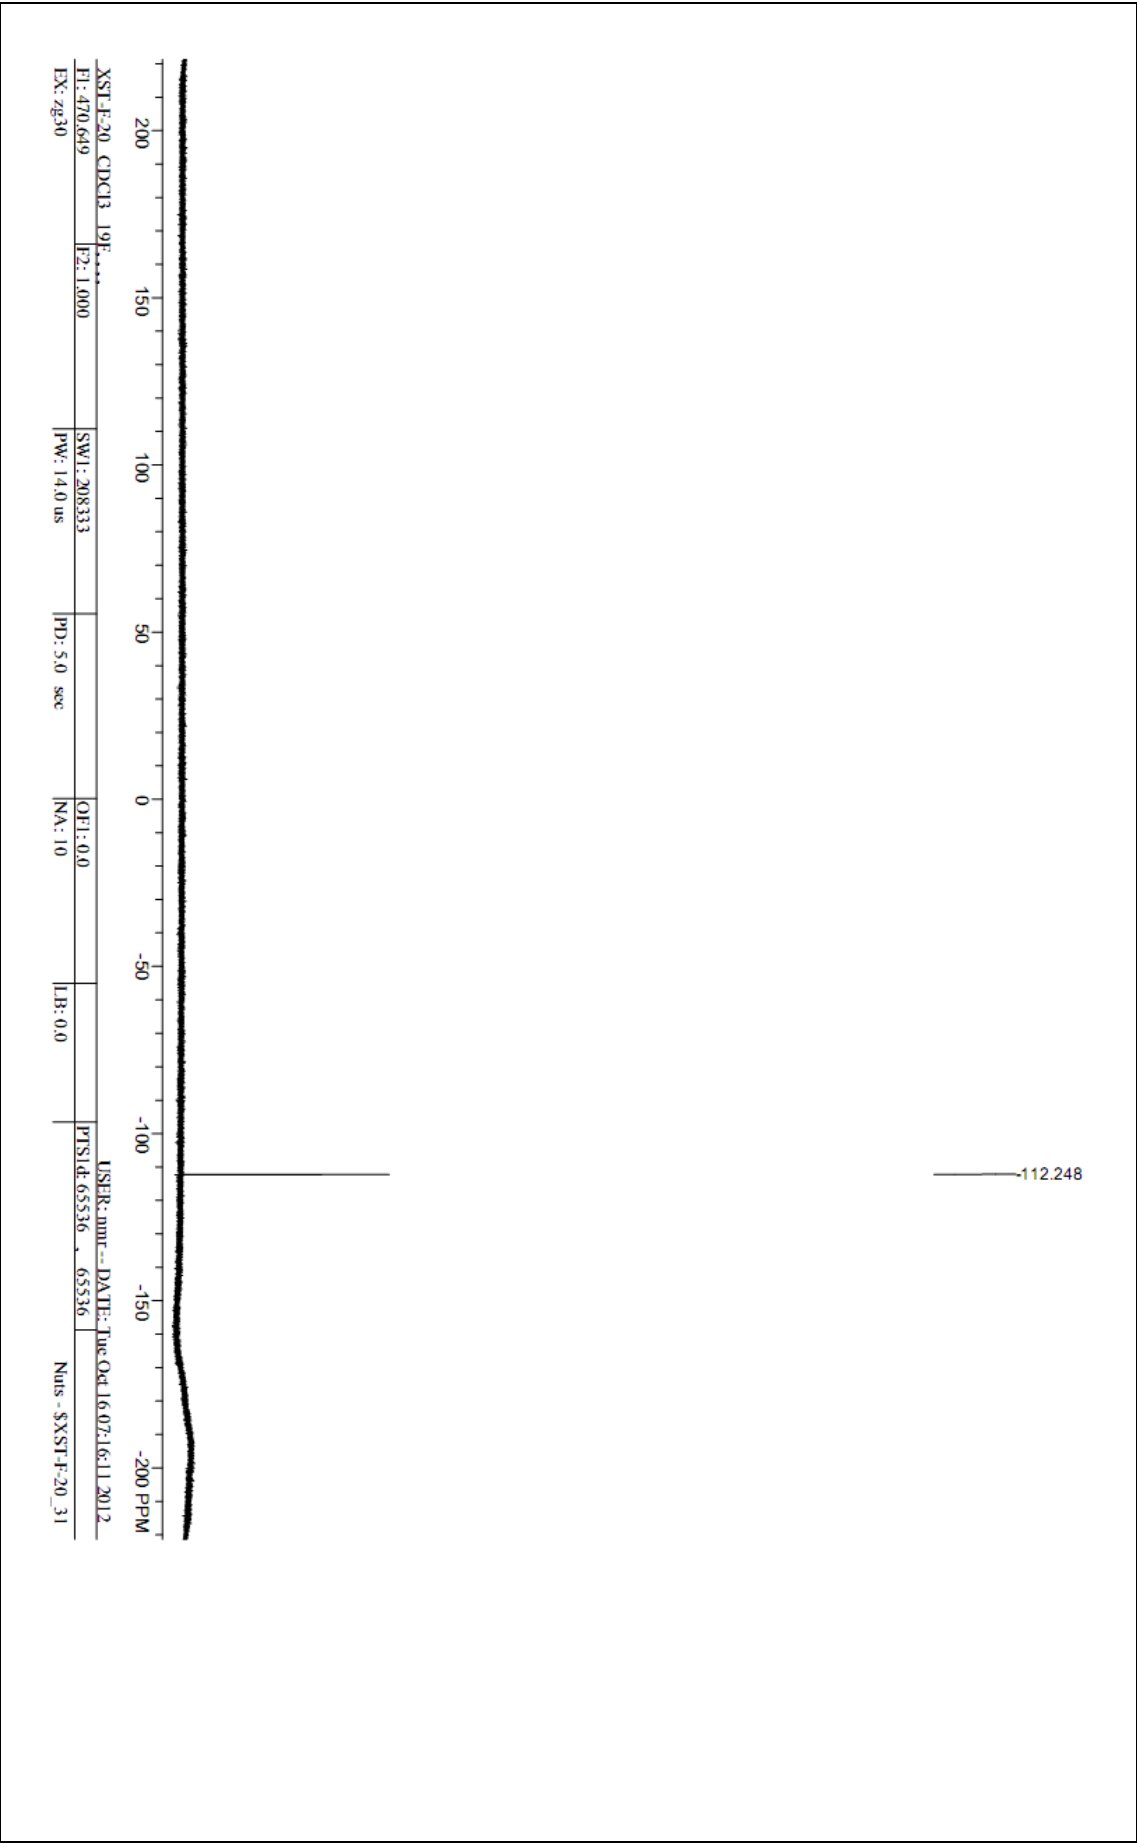



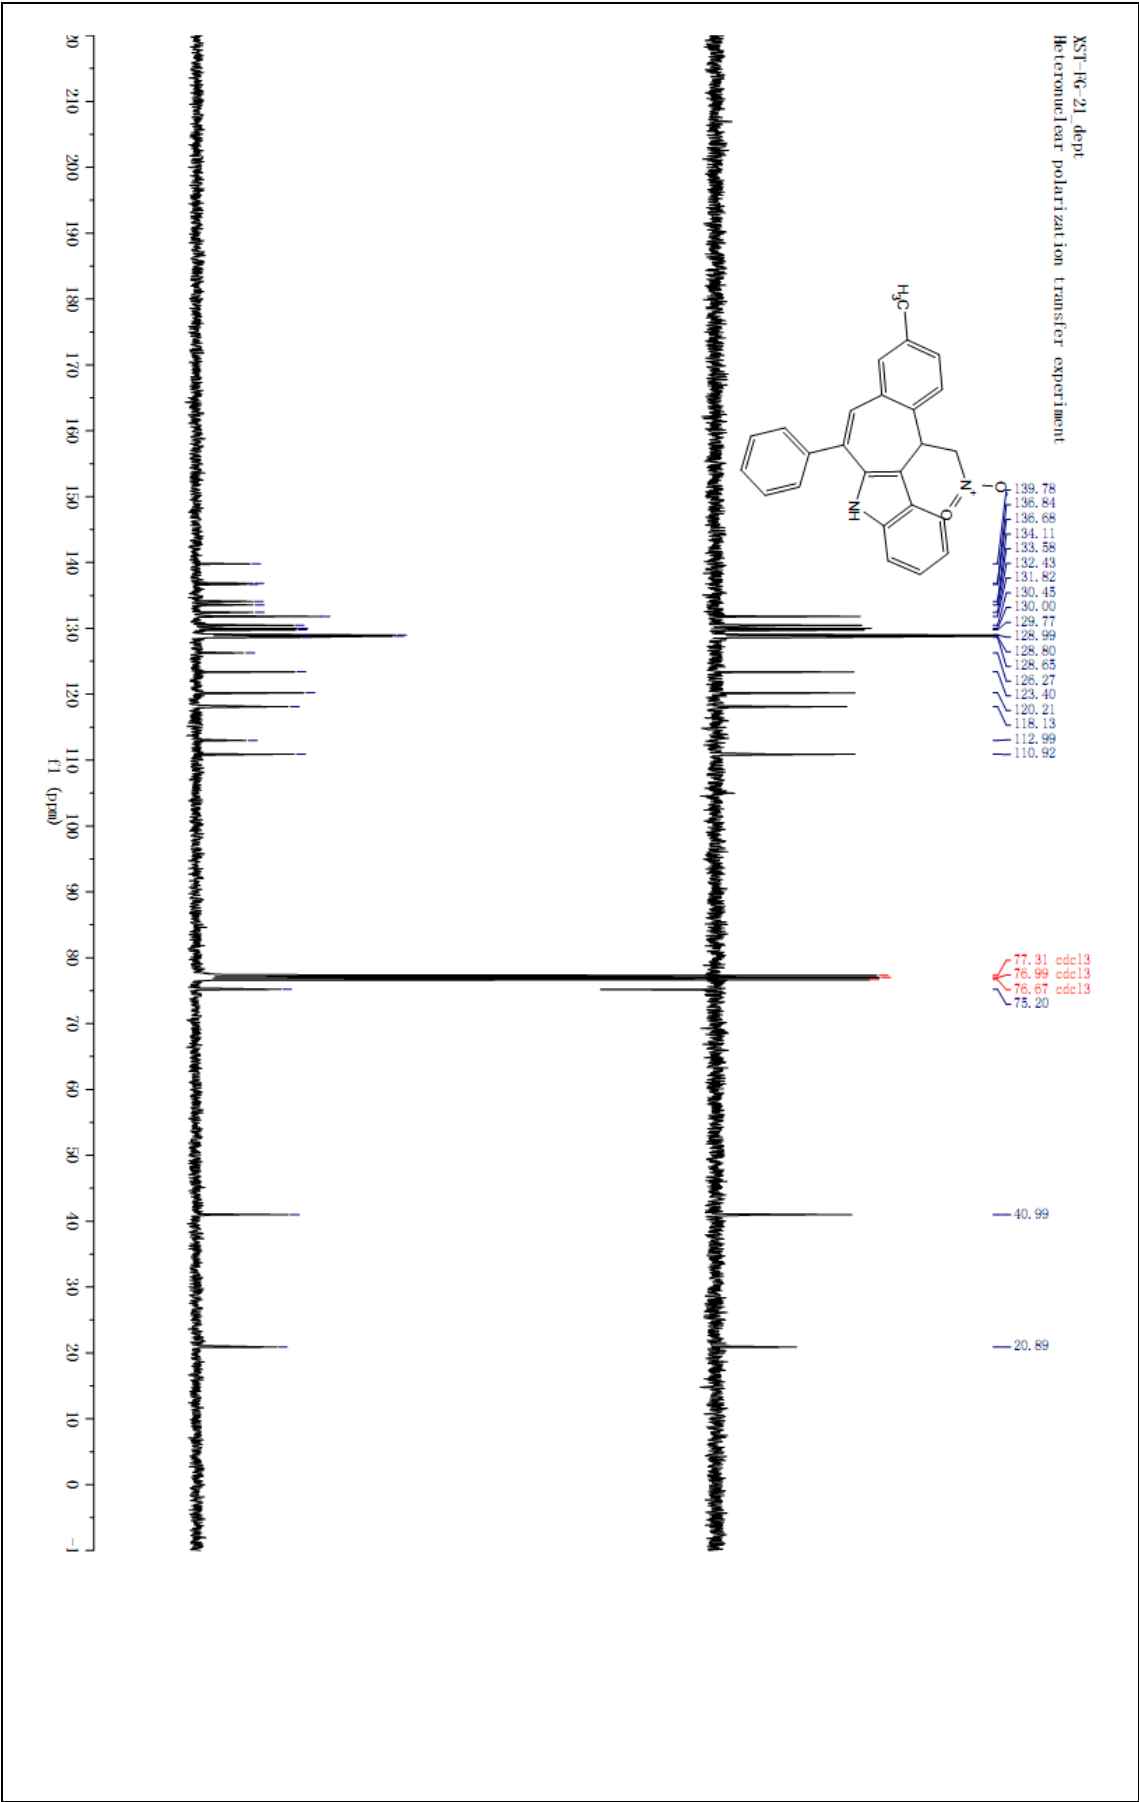





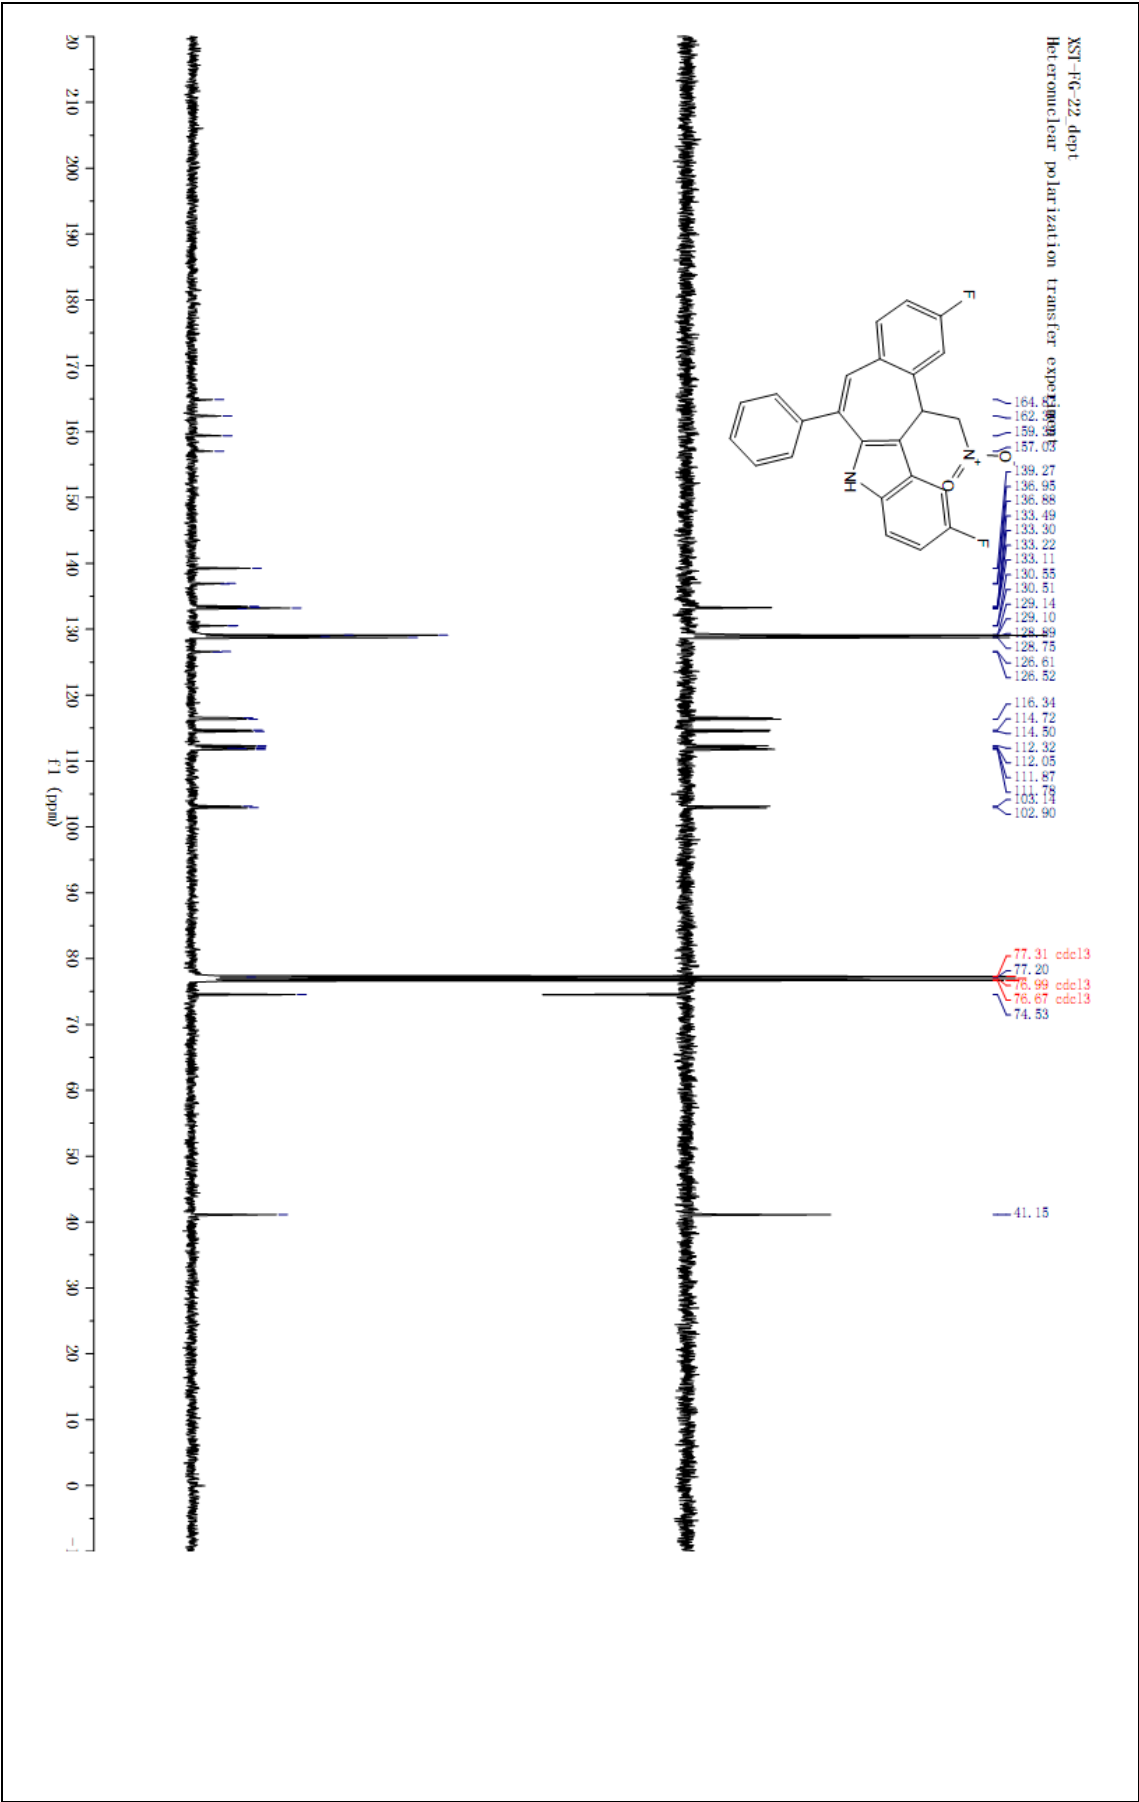

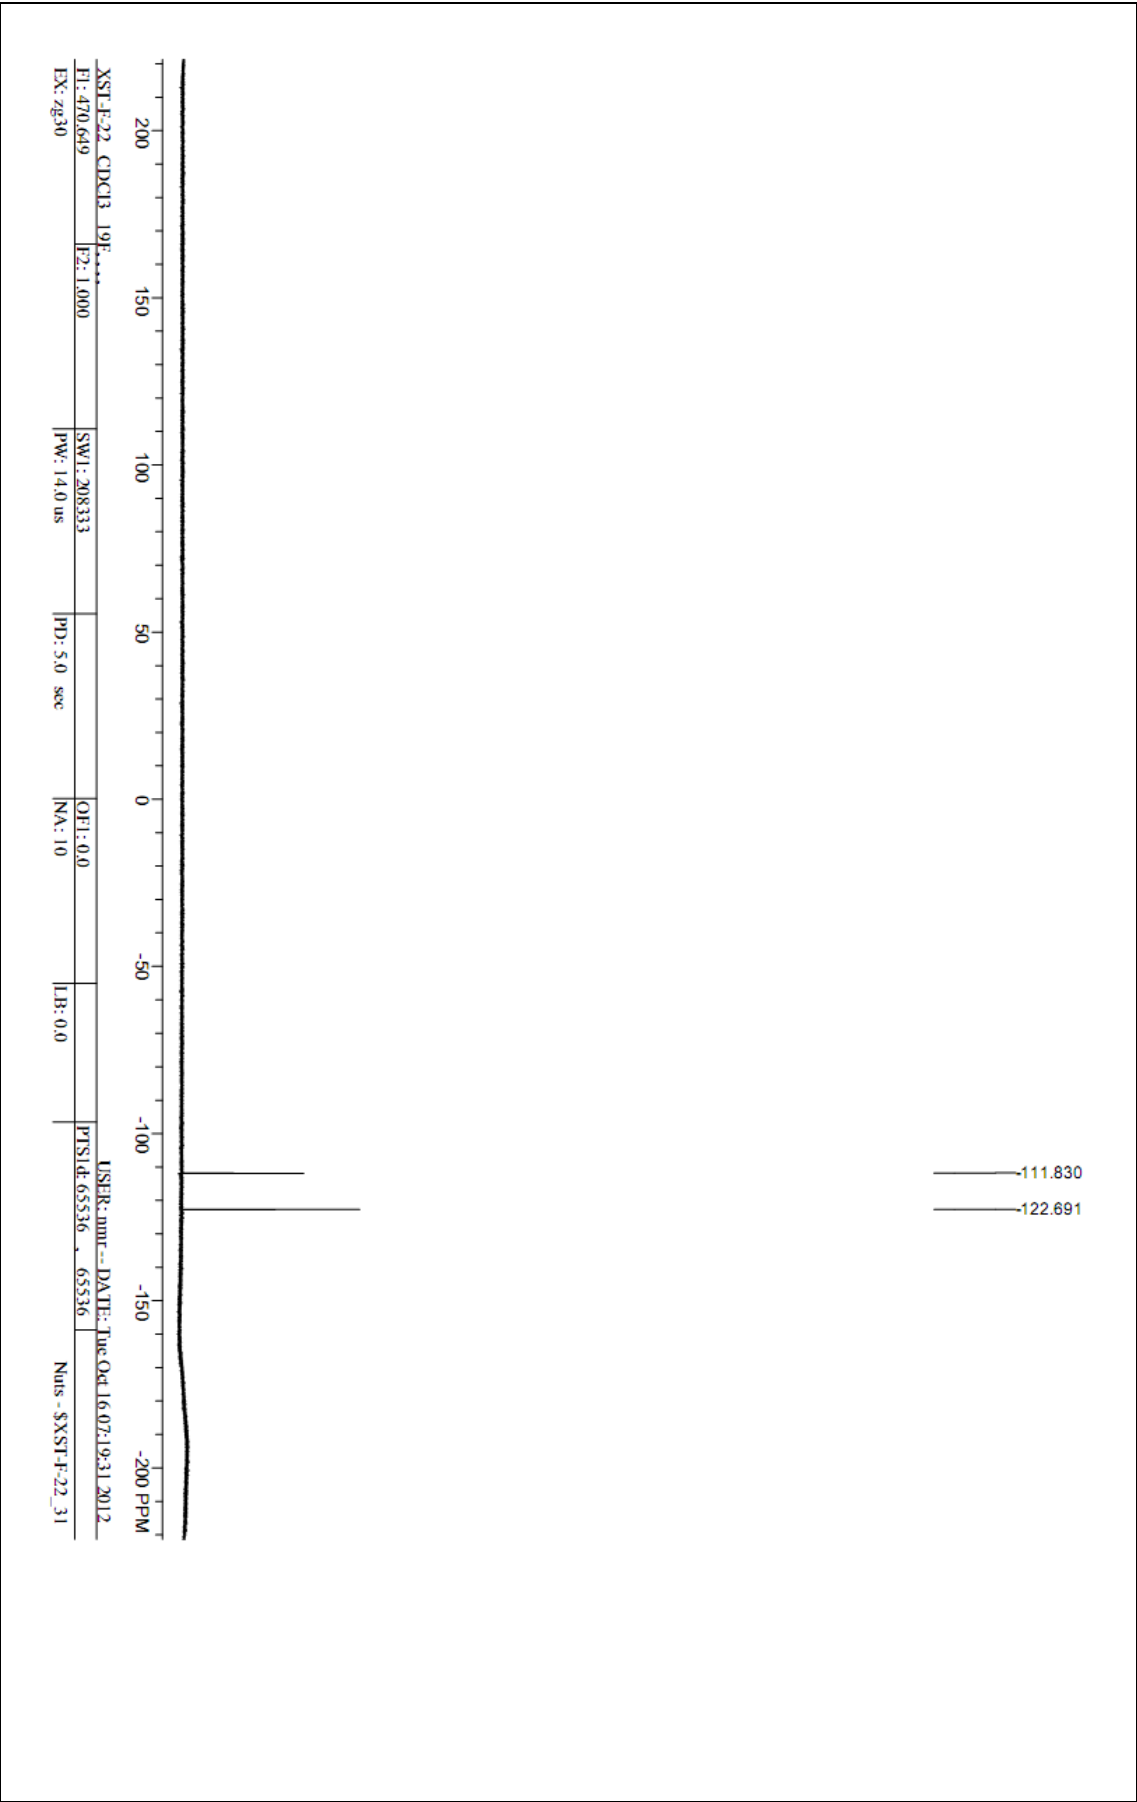

**2-Bromo-10-methyl-12-(nitromethyl)-6-(*p*-tolyl)-5,12-dihydrobenzo[4,5]  
cyclohepta[1,2-*b*] indole (3Md)**

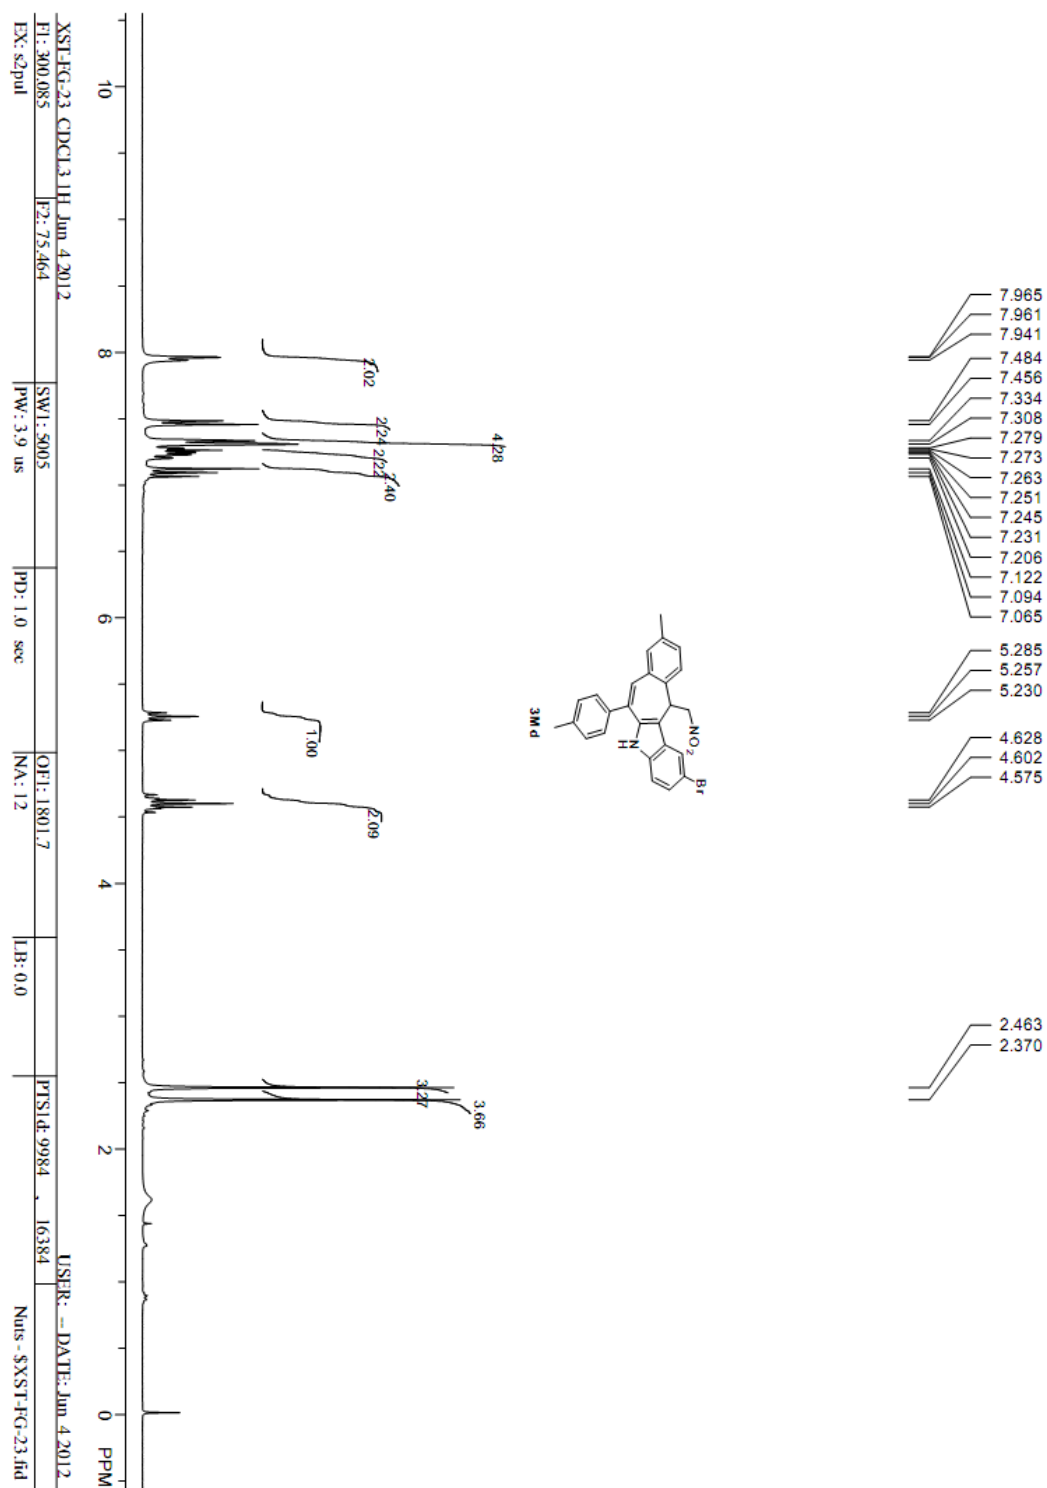

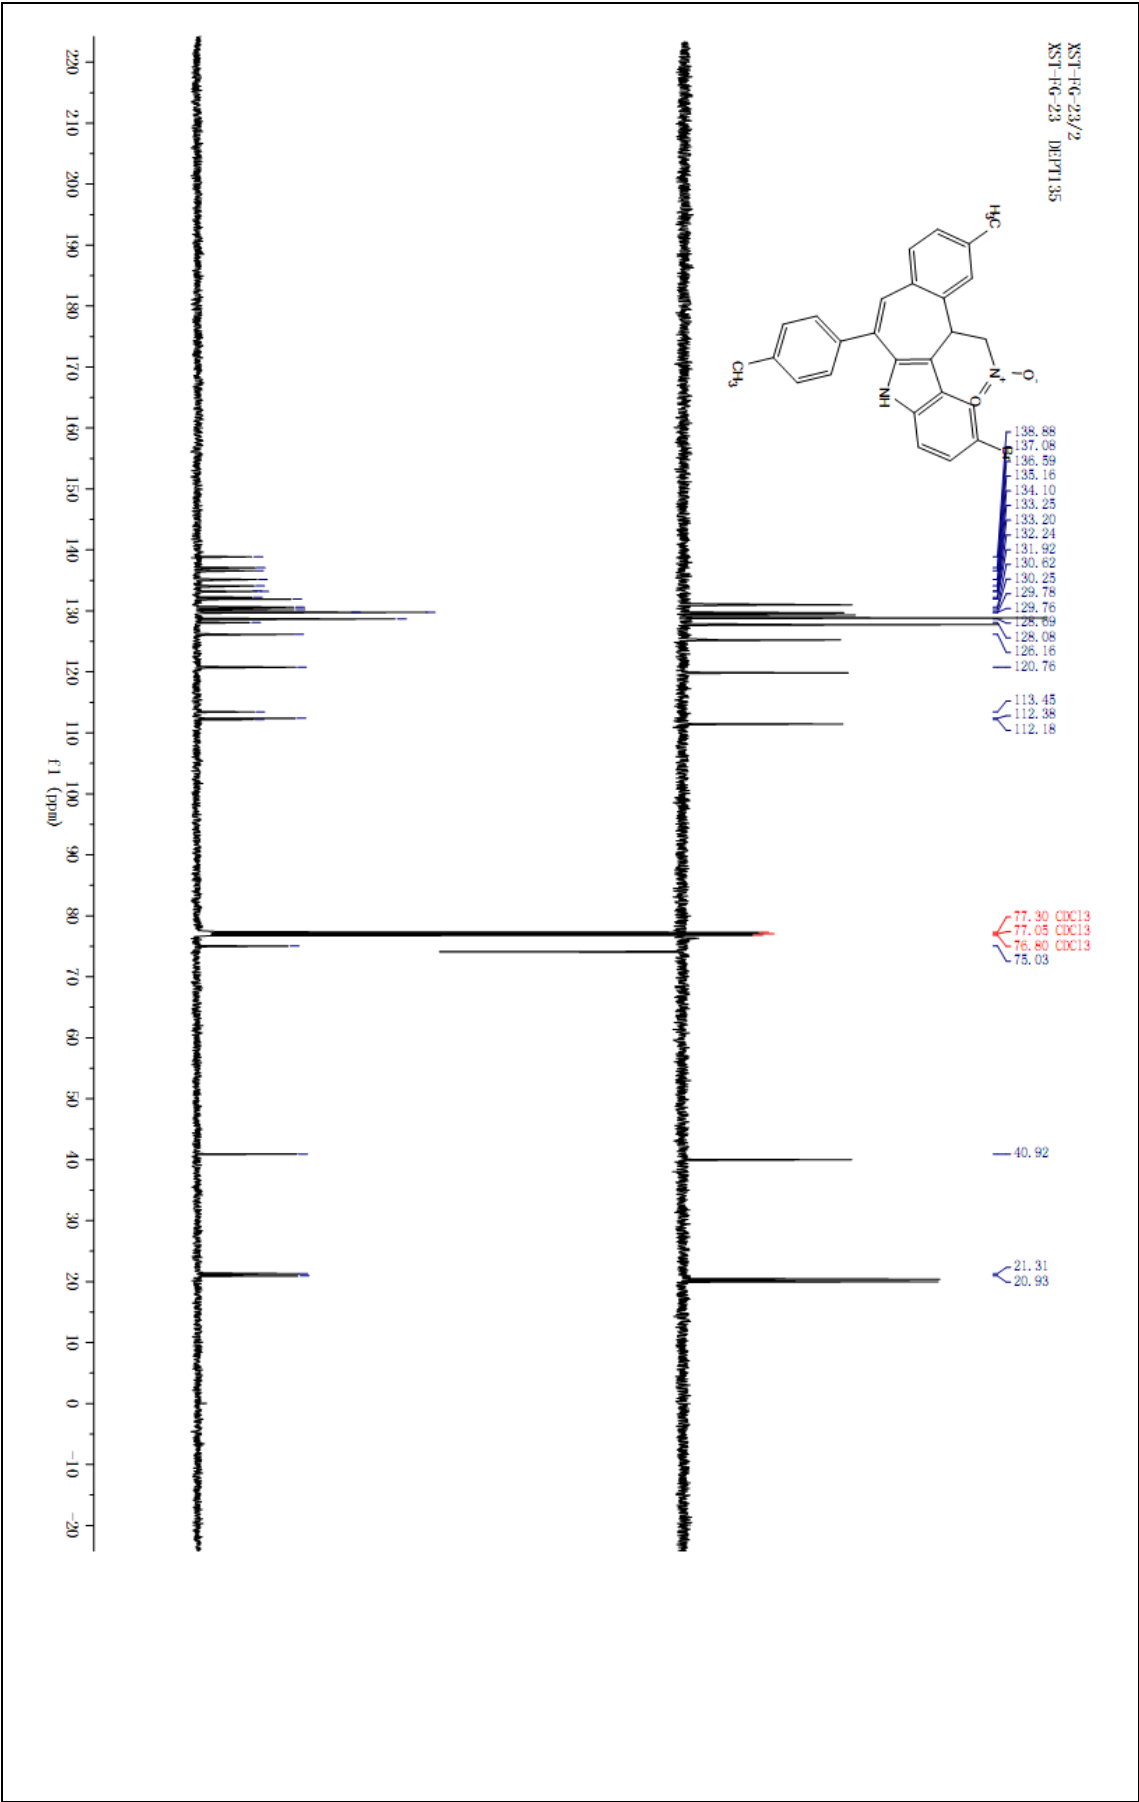

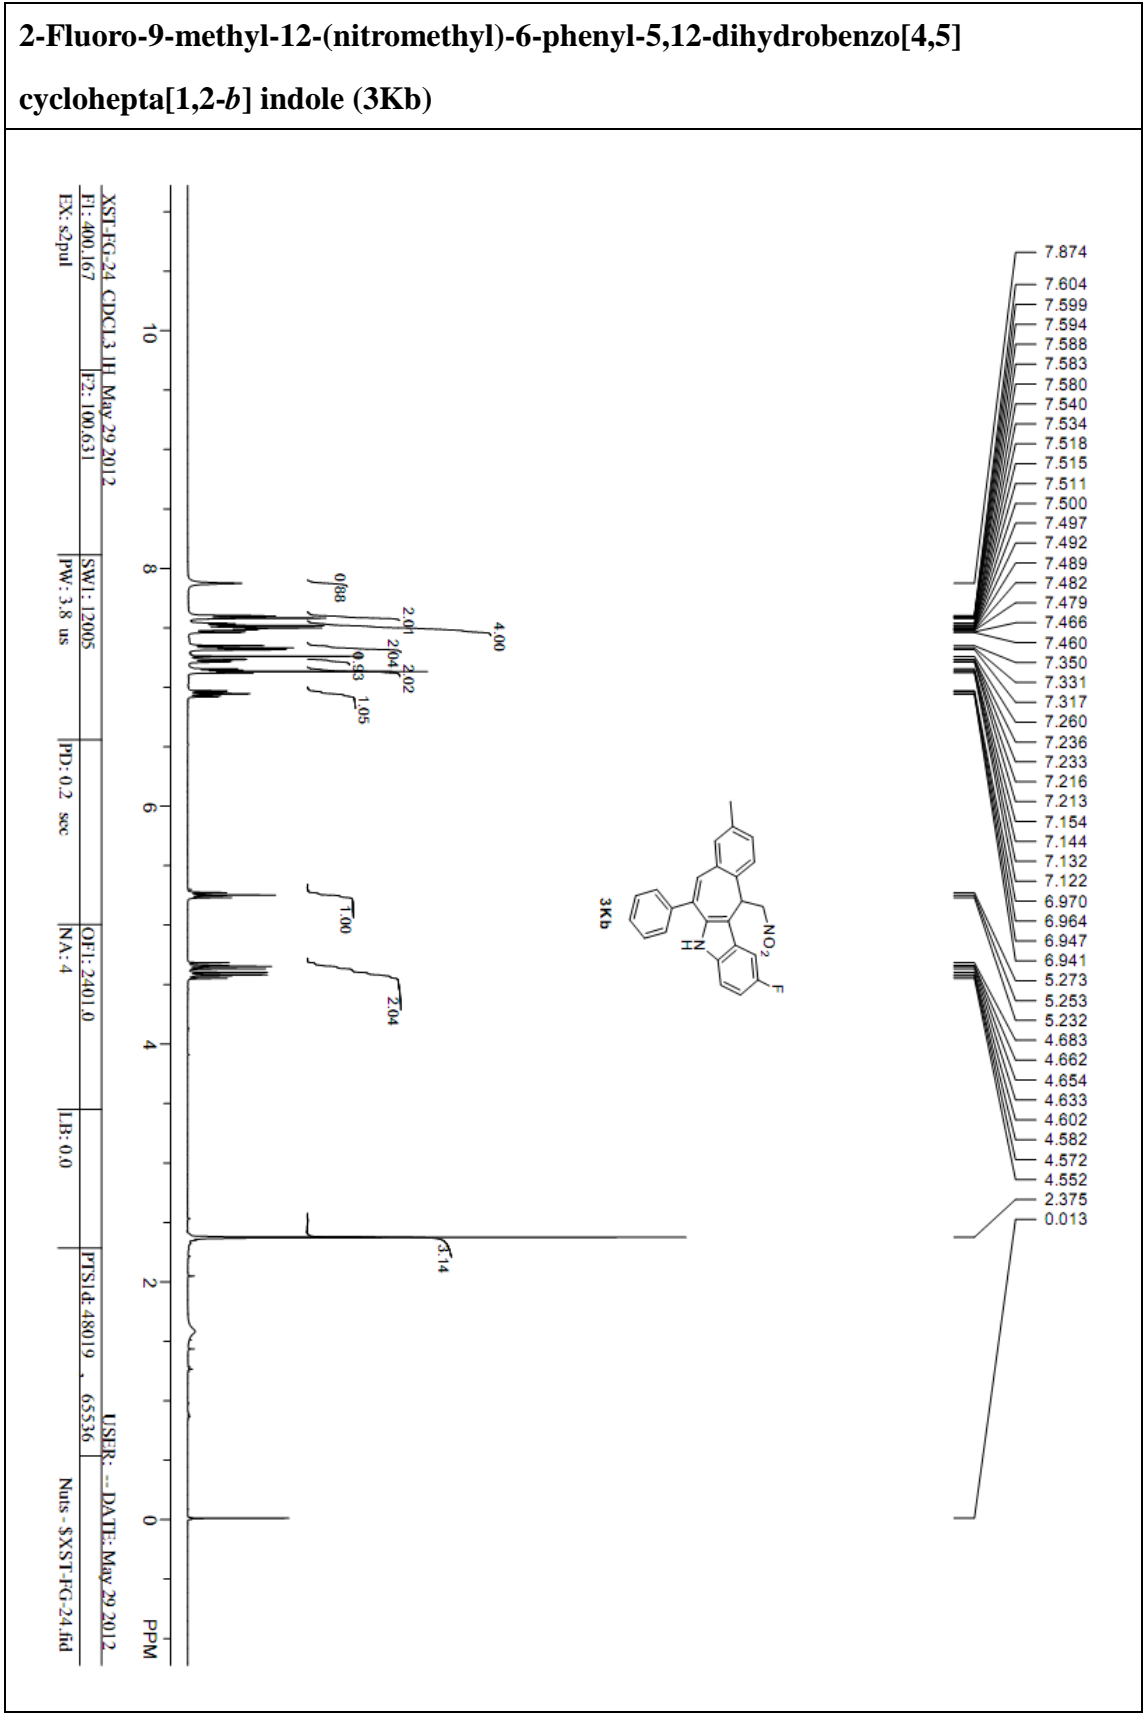

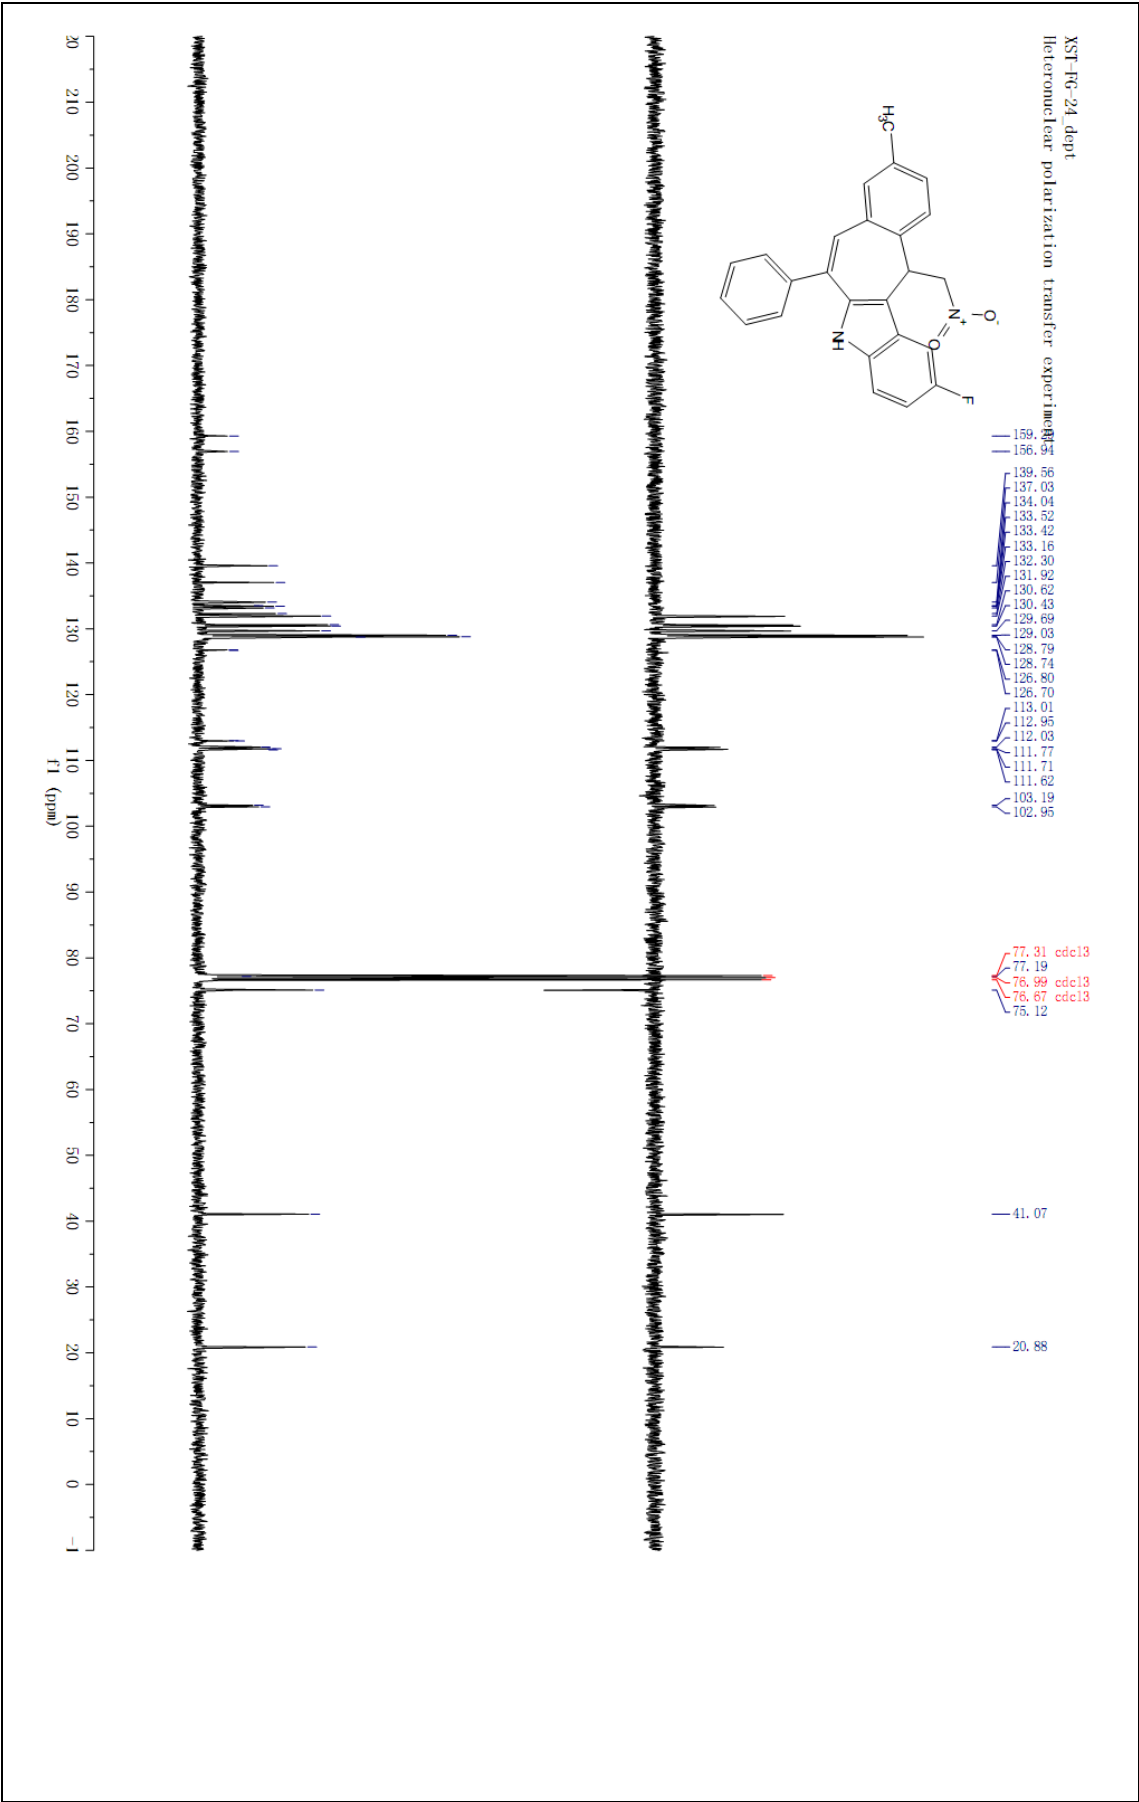

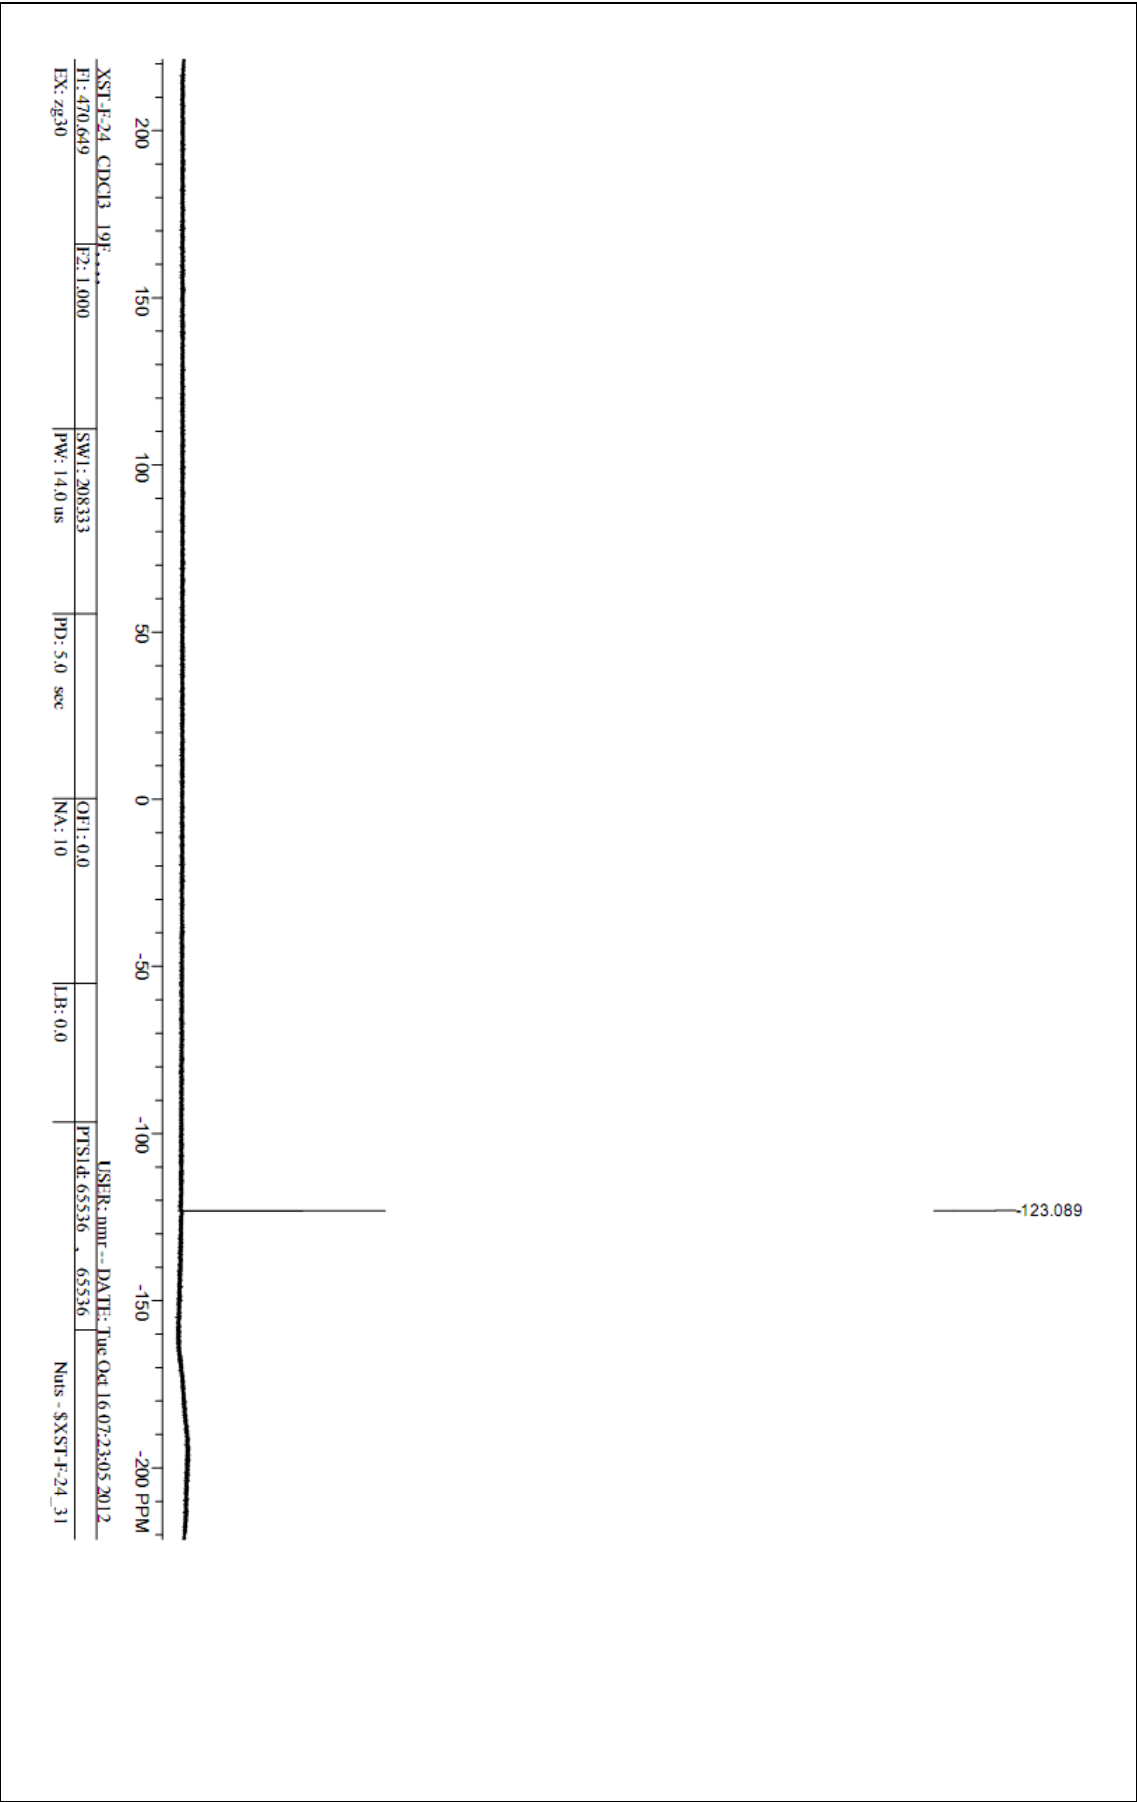



**2-Methoxy-9-methyl-12-(nitromethyl)-6-phenyl-5,12-dihydrobenzo[4,5]  
cyclohepta[1,2-*b*] indole (3Ke)**

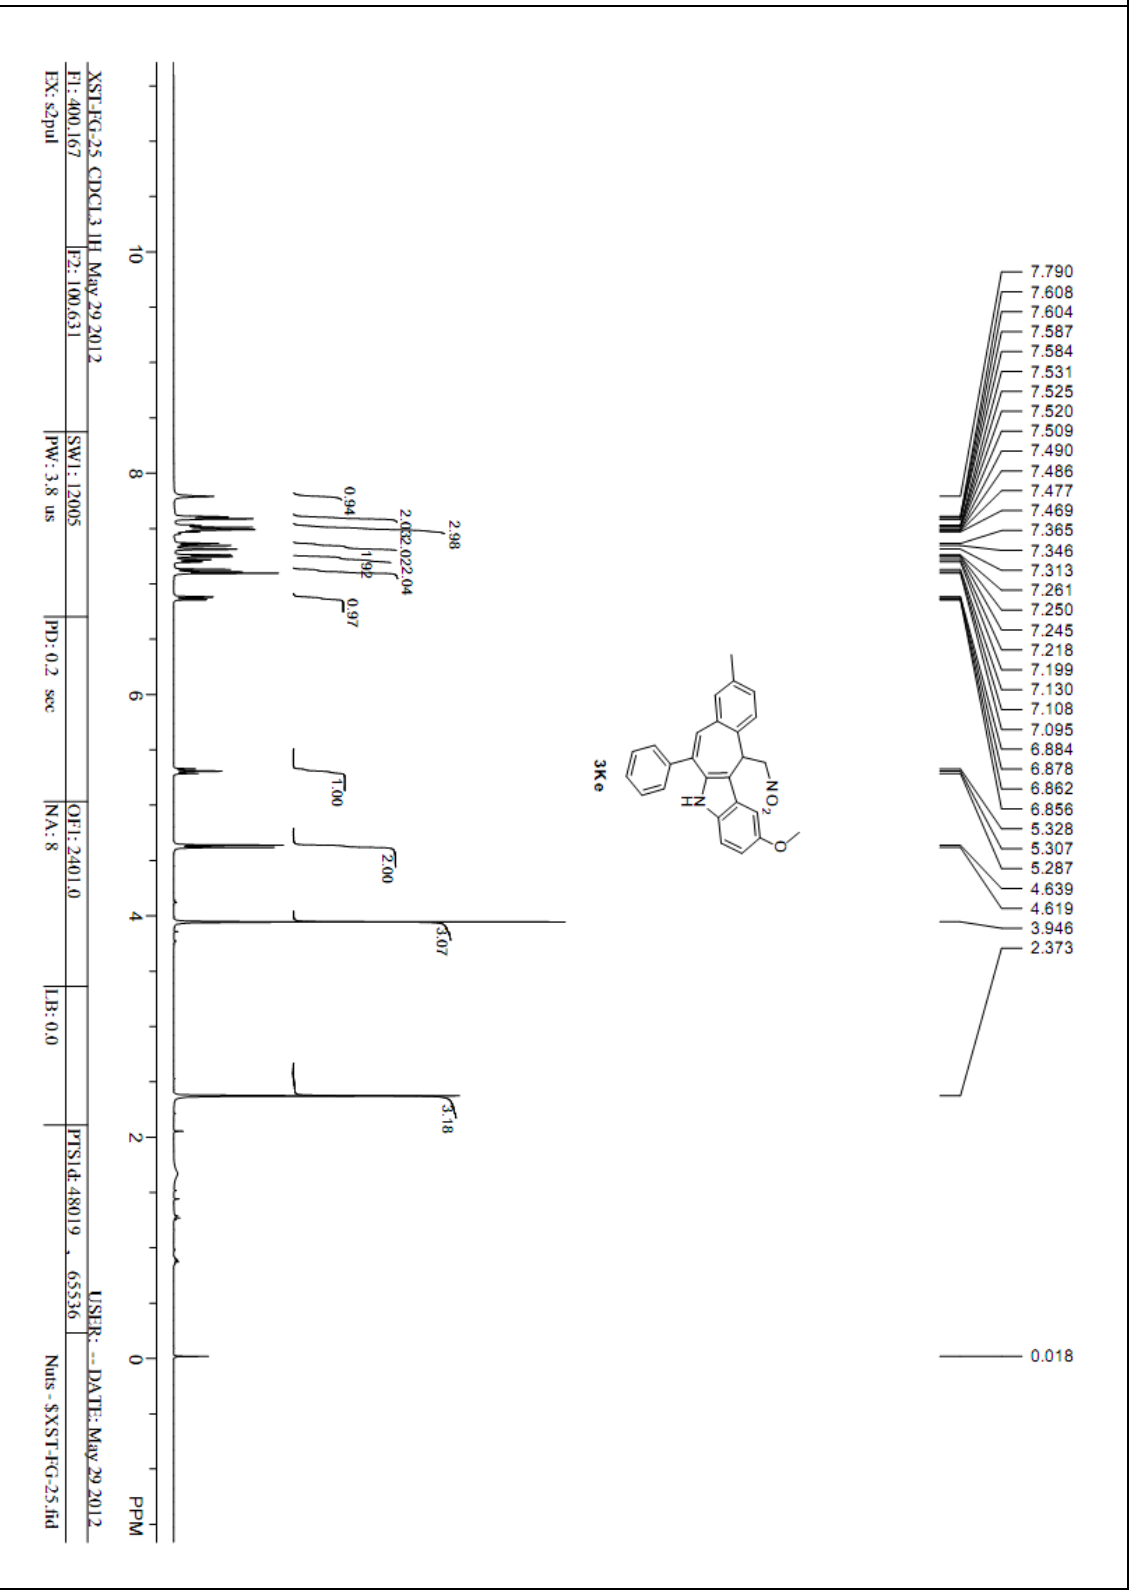

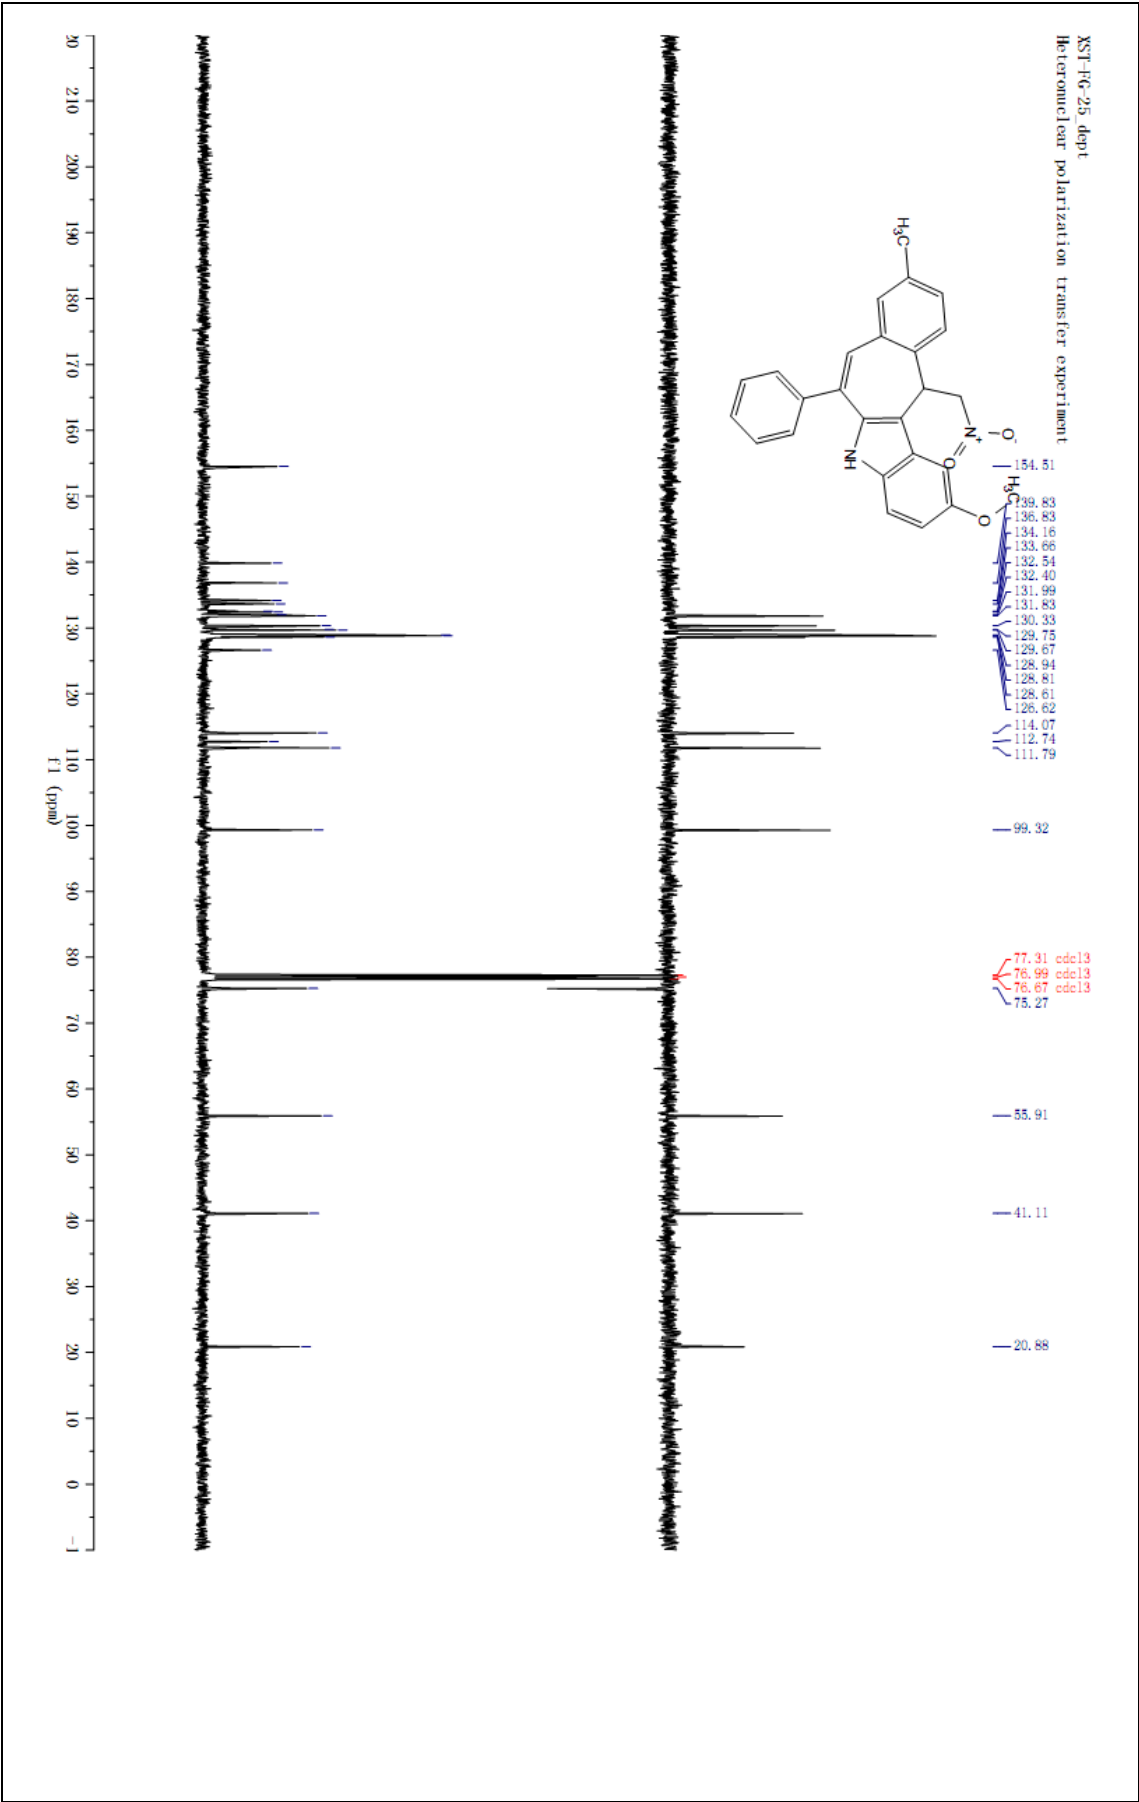

**2-Methoxy-10-fluoro-12-(nitromethyl)-6-(*p*-tolyl)-5,12-dihydrobenzo[4,5]  
cyclohepta[1,2-*b*] indole (3Le)**

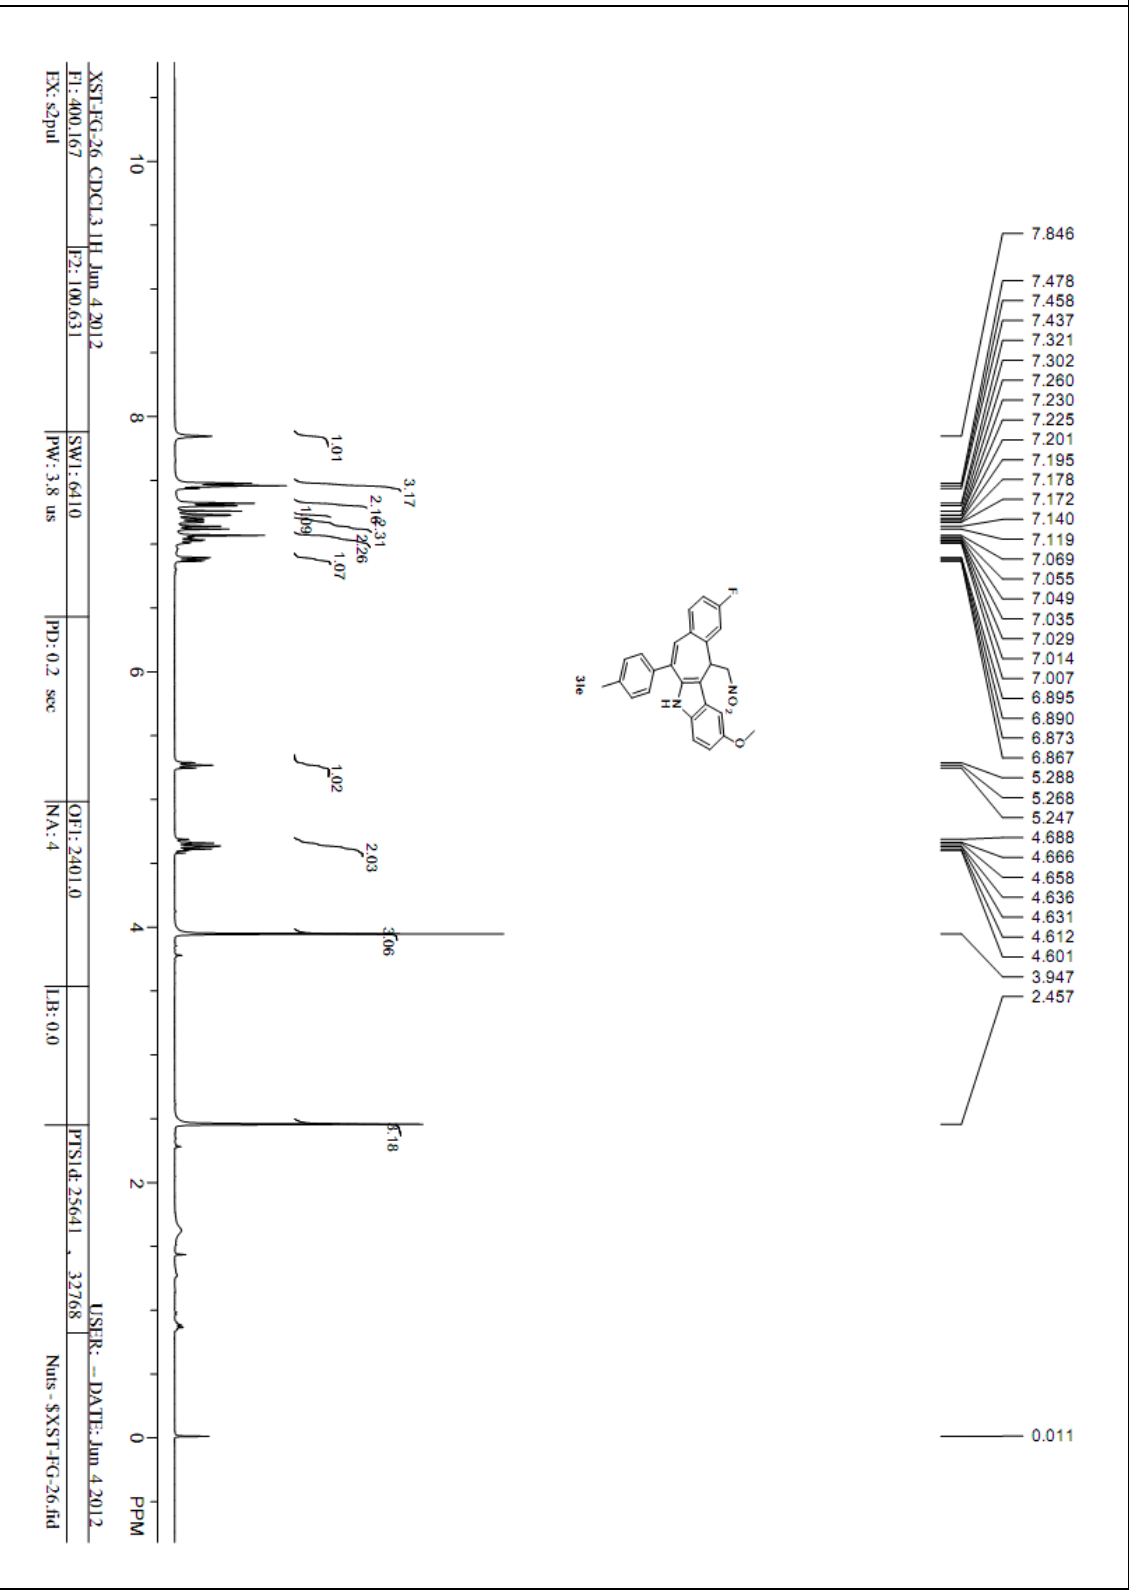

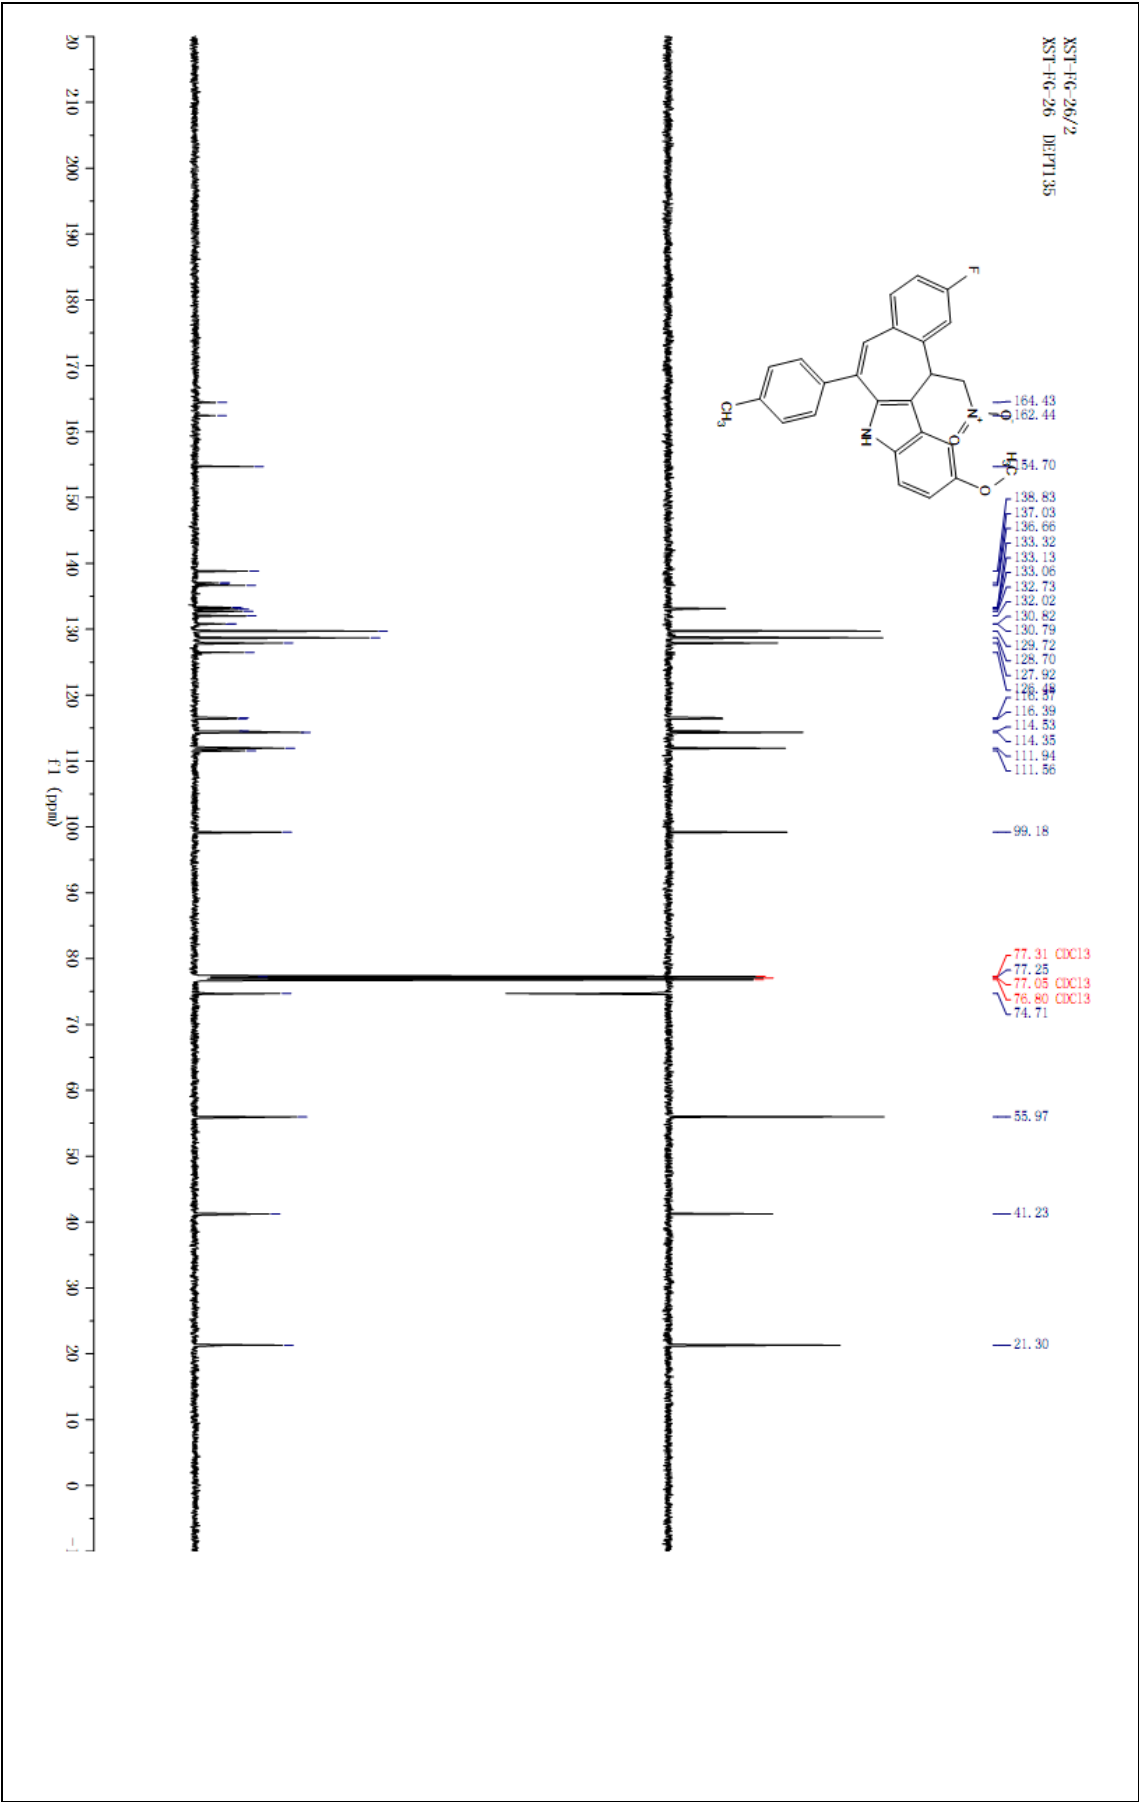

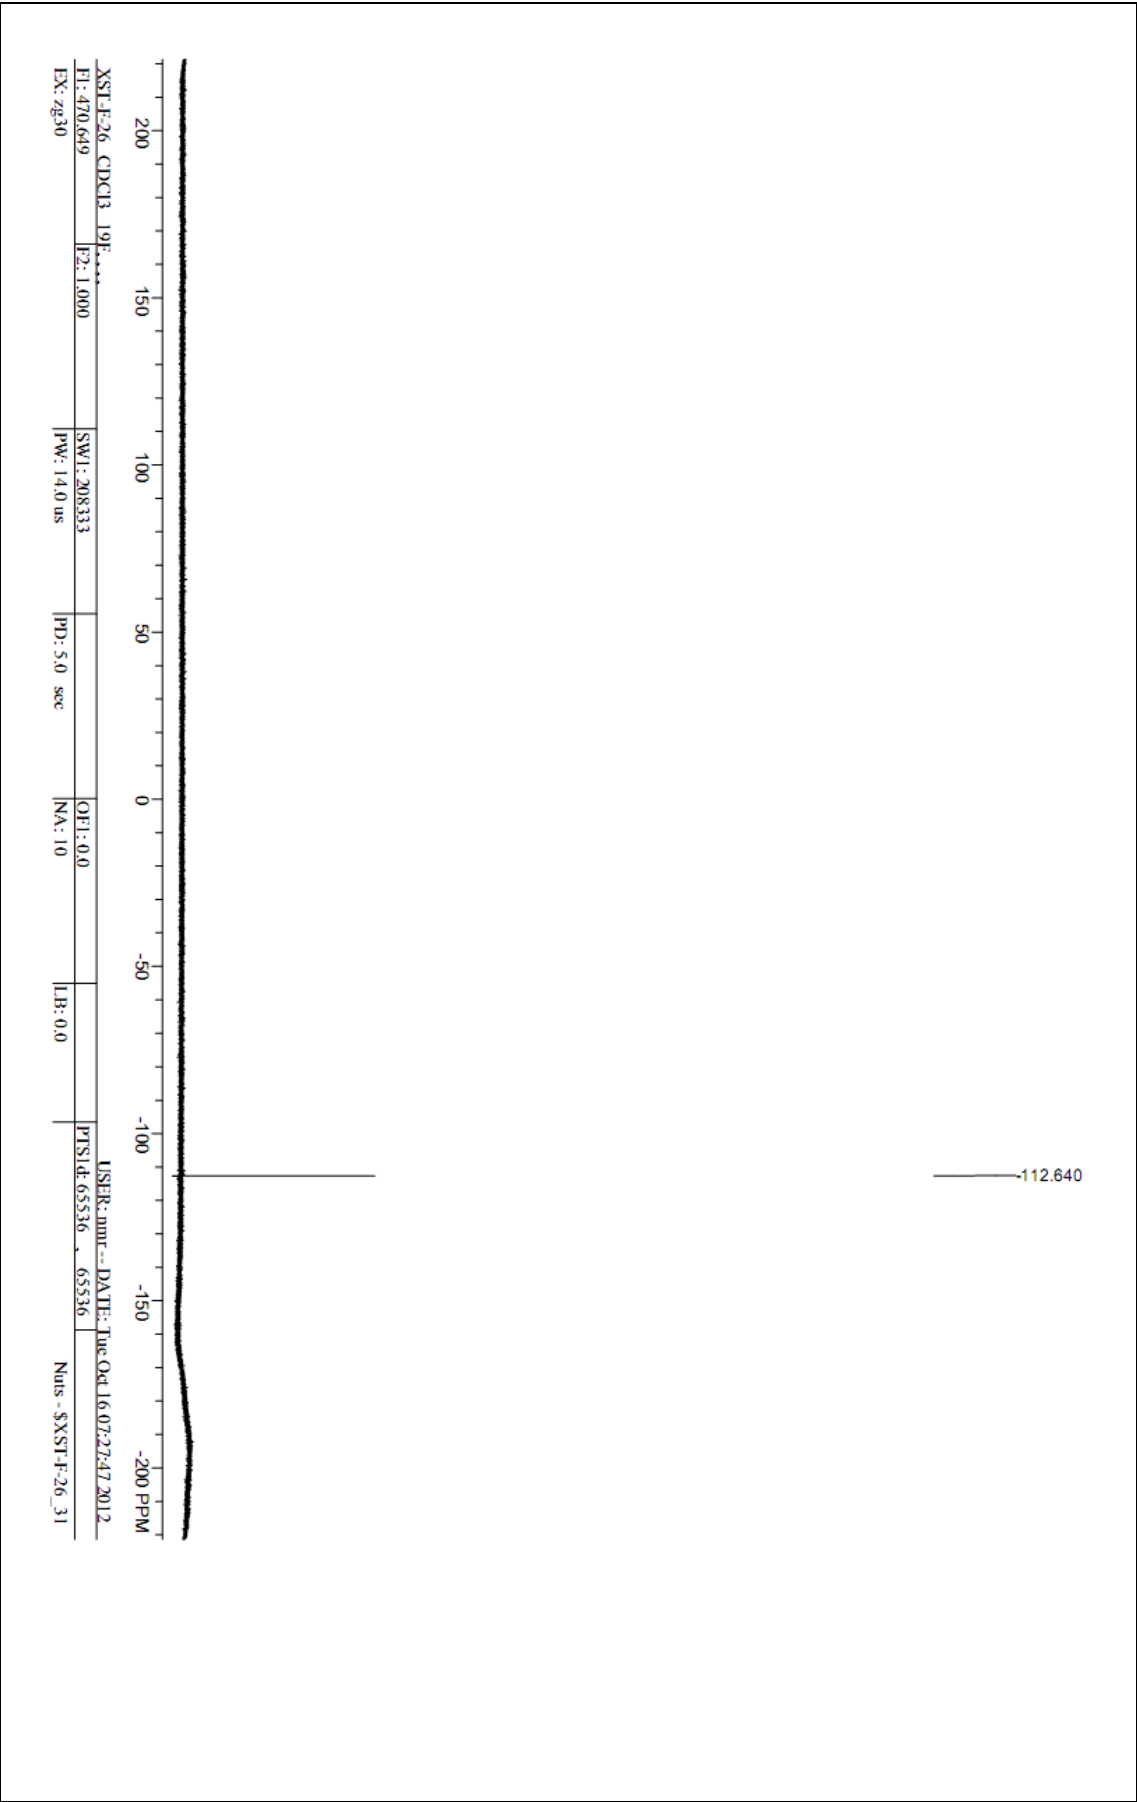

**2-Methoxy-9-methyl-12-(nitromethyl)-6-(*p*-tolyl)-5,12-dihydrobenzo[4,5]  
cyclohepta[1,2-*b*] indole (3Me)**

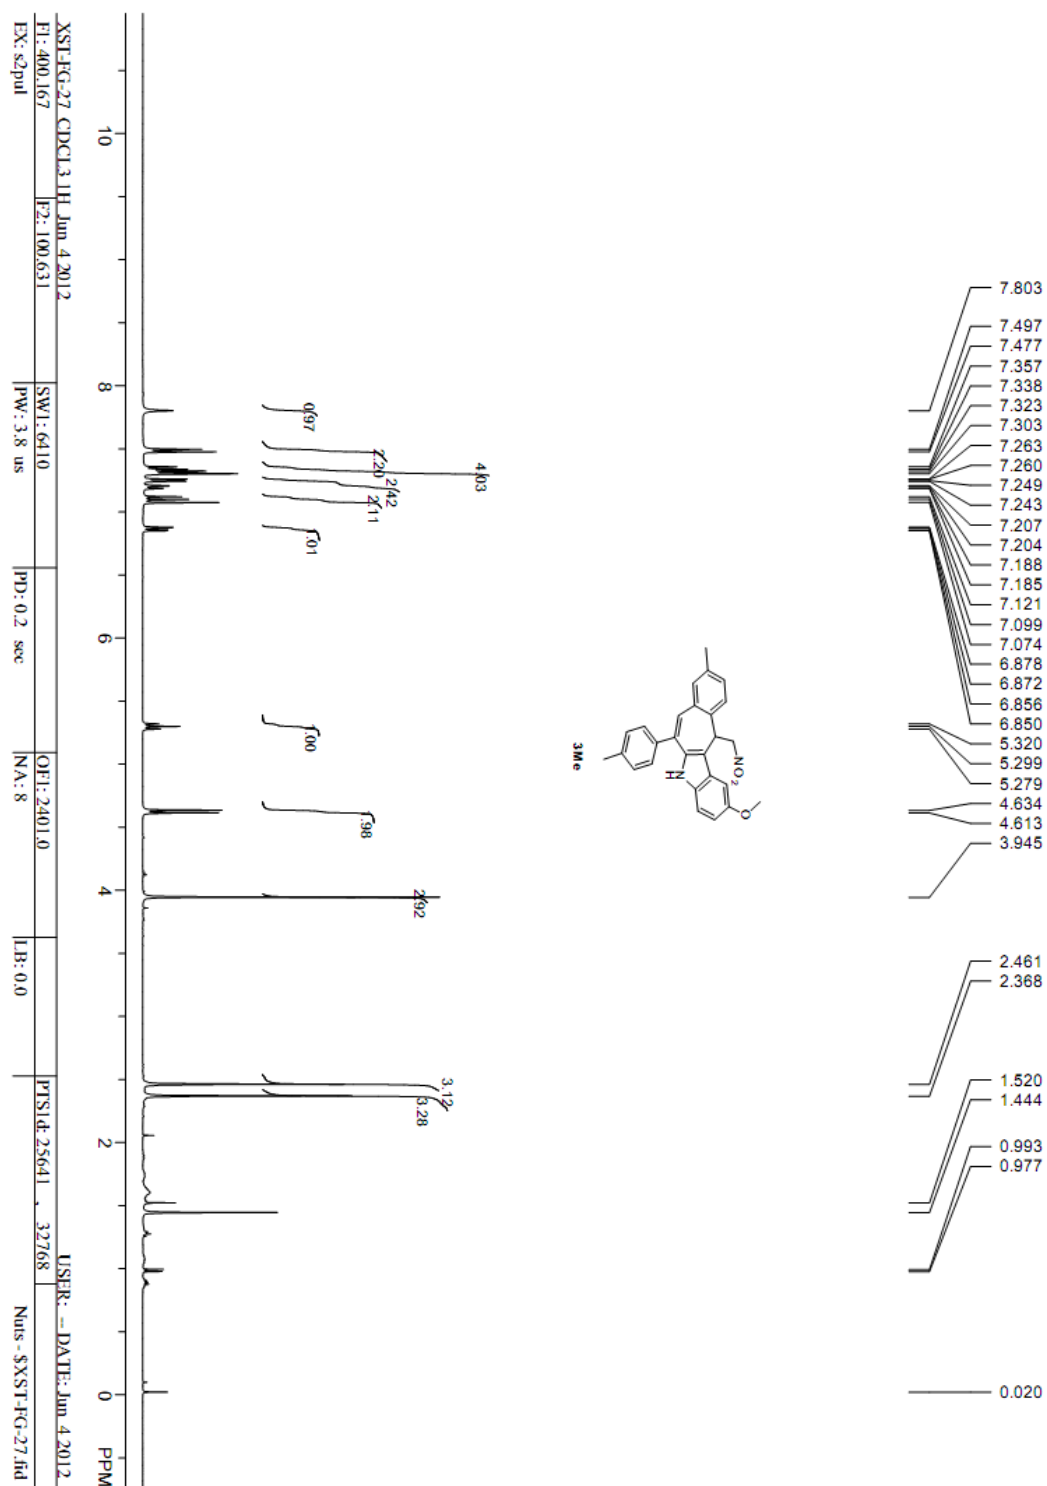

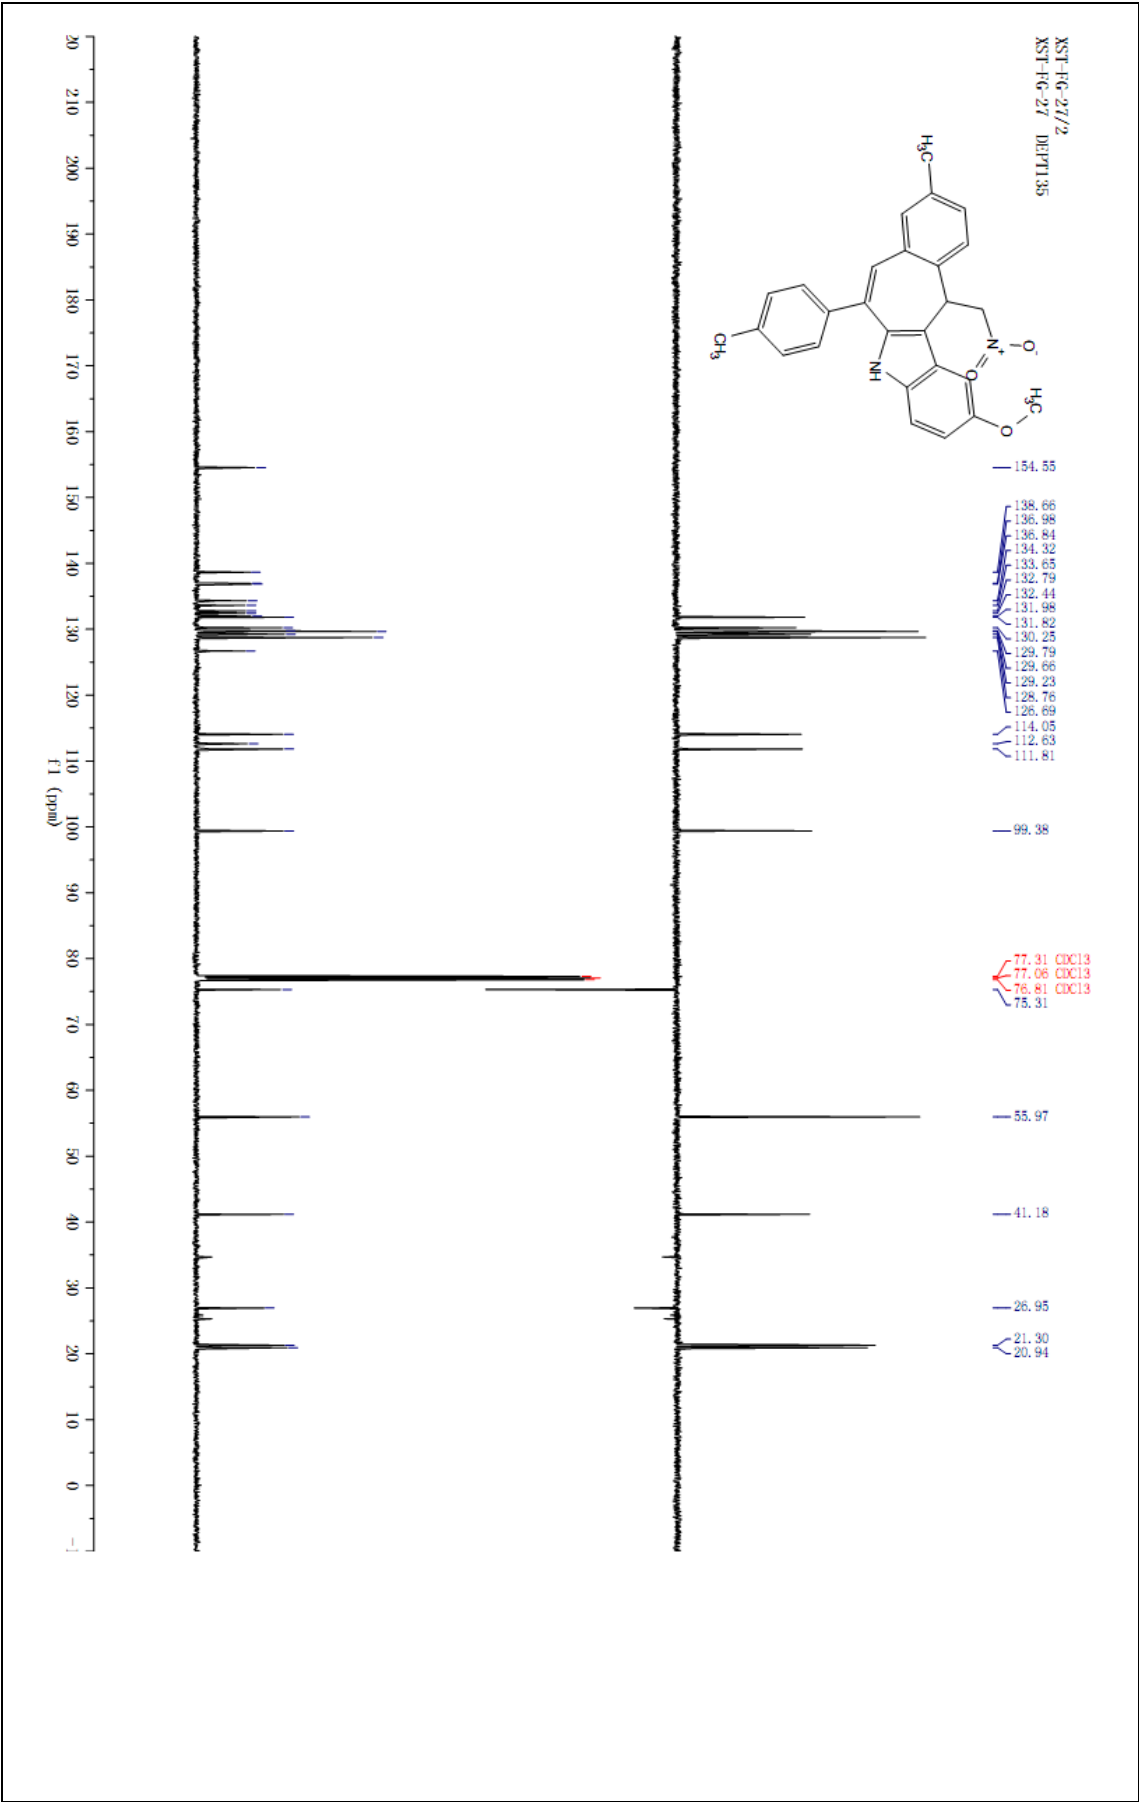

**1-Methyl-9-methyl-12-(nitromethyl)-6-(*p*-tolyl)-5,12-dihydrobenzo[4,5]  
cyclohepta[1,2-*b*] indole (3Mh)**

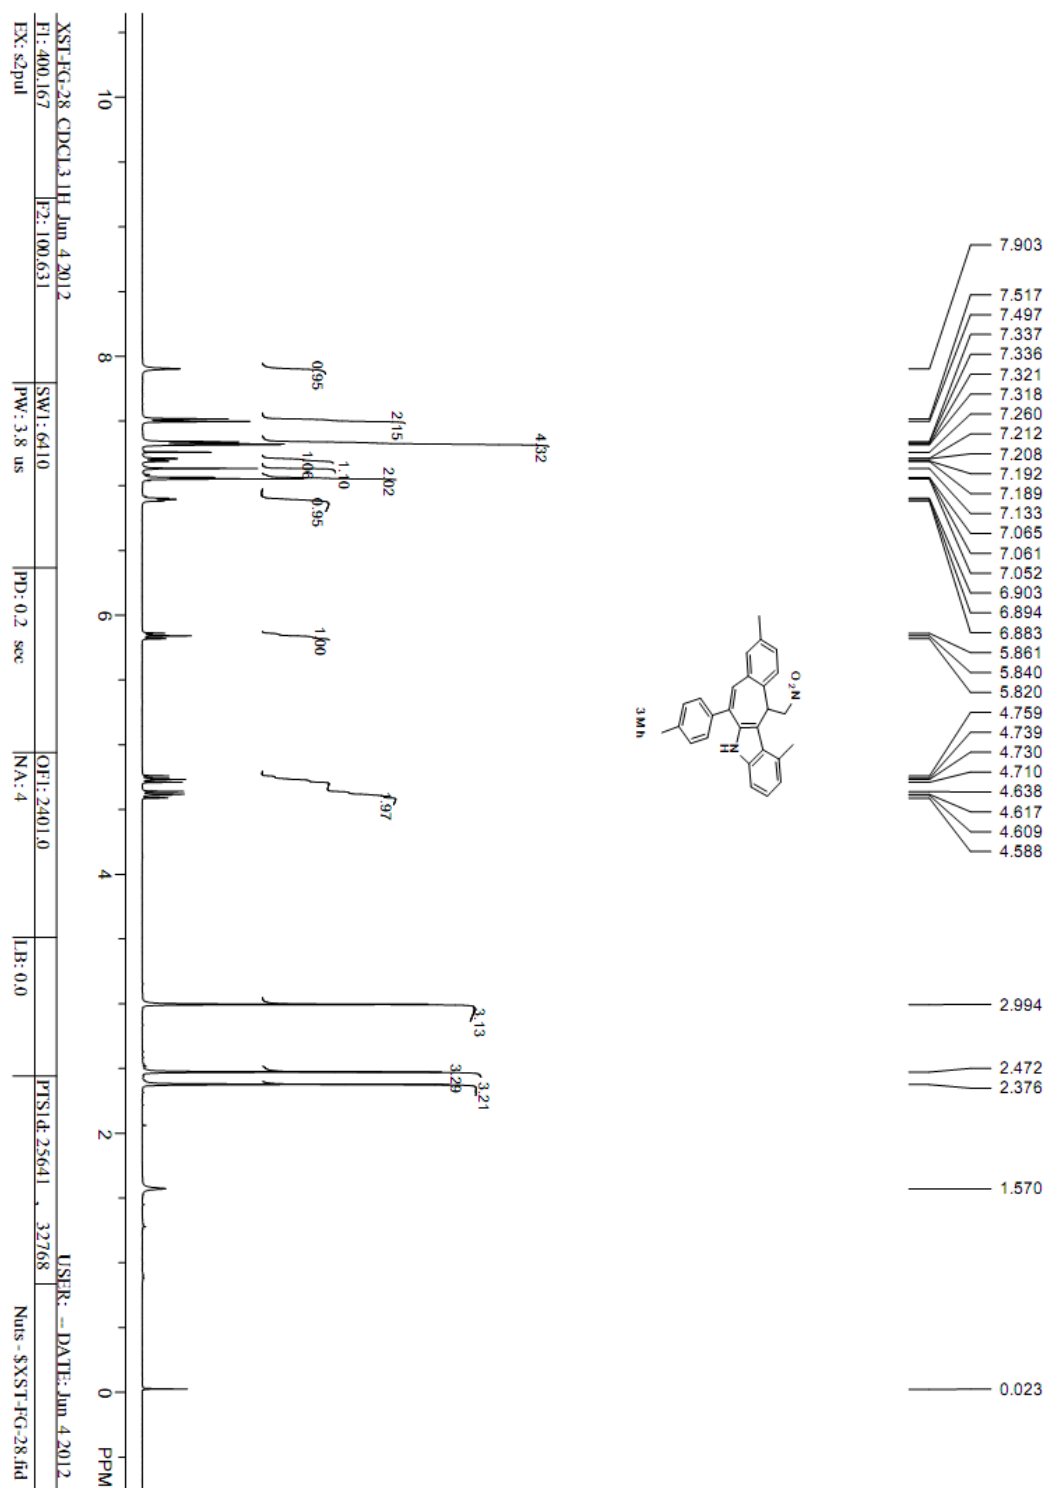



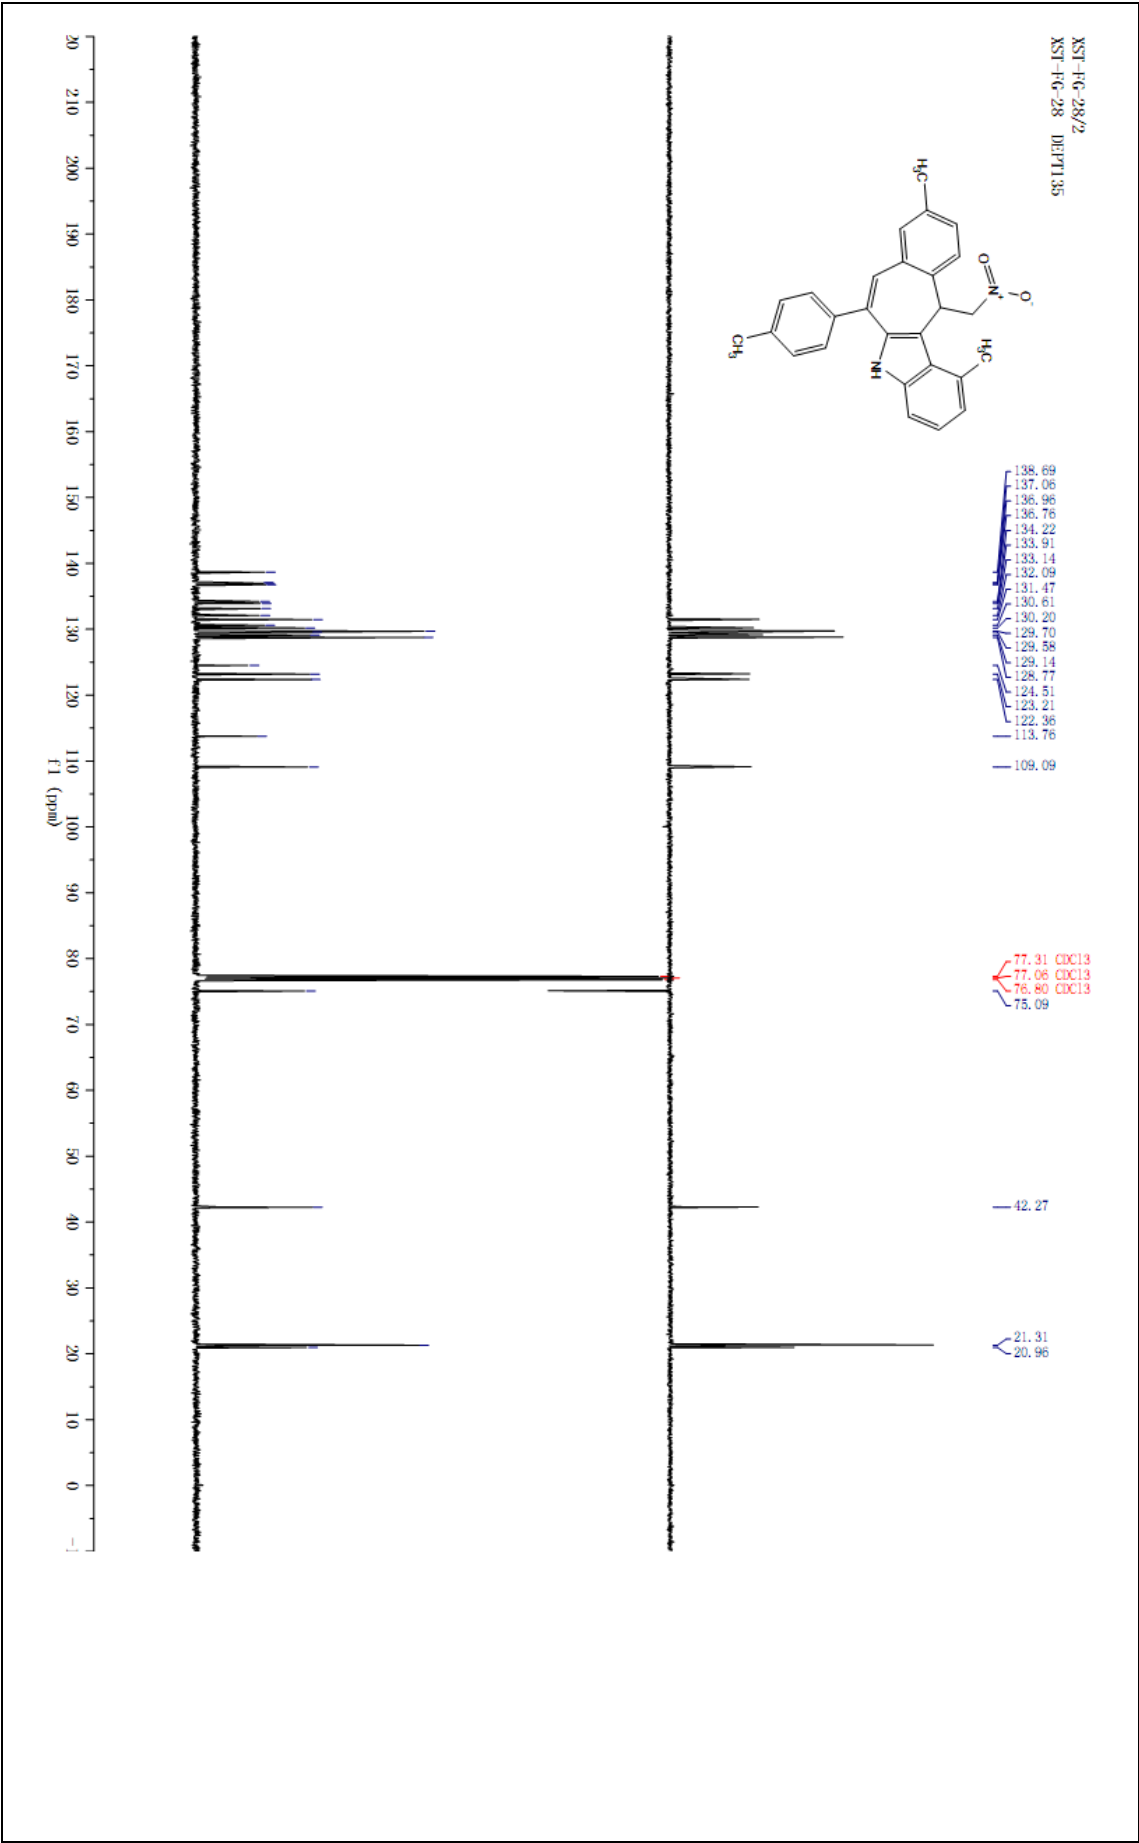

**2-Methyl-9-methyl-12-(nitromethyl)-6-(*p*-tolyl)-5,12-dihydrobenzo[4,5]  
cyclohepta[1,2-*b*] indole (3Mi)**

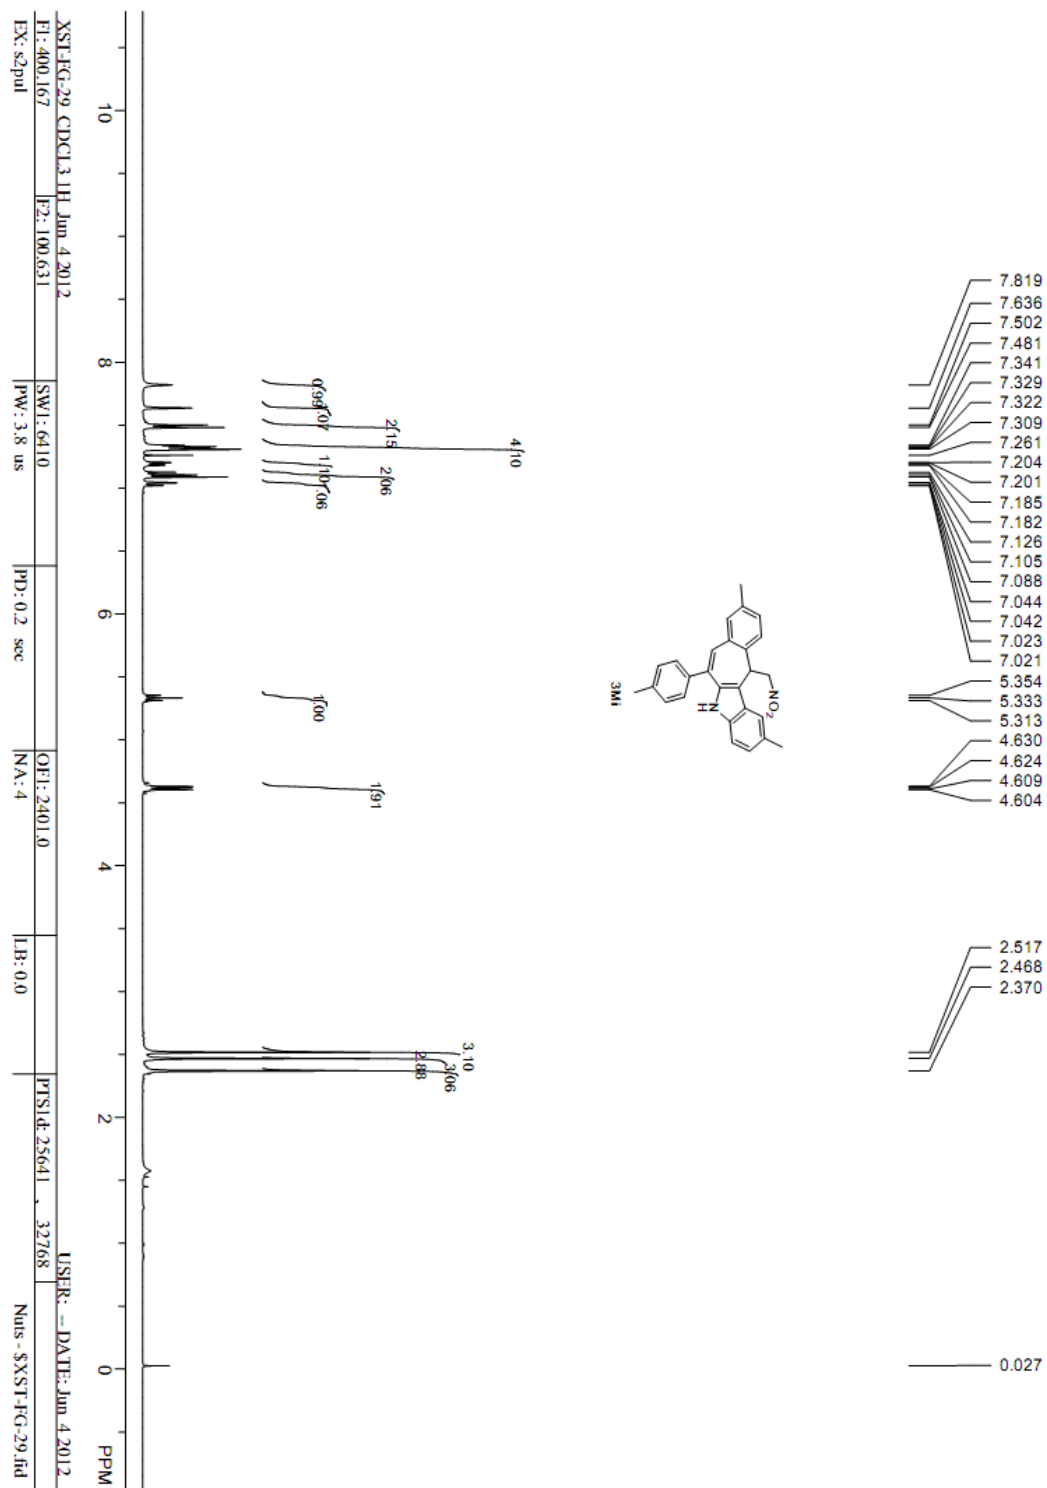

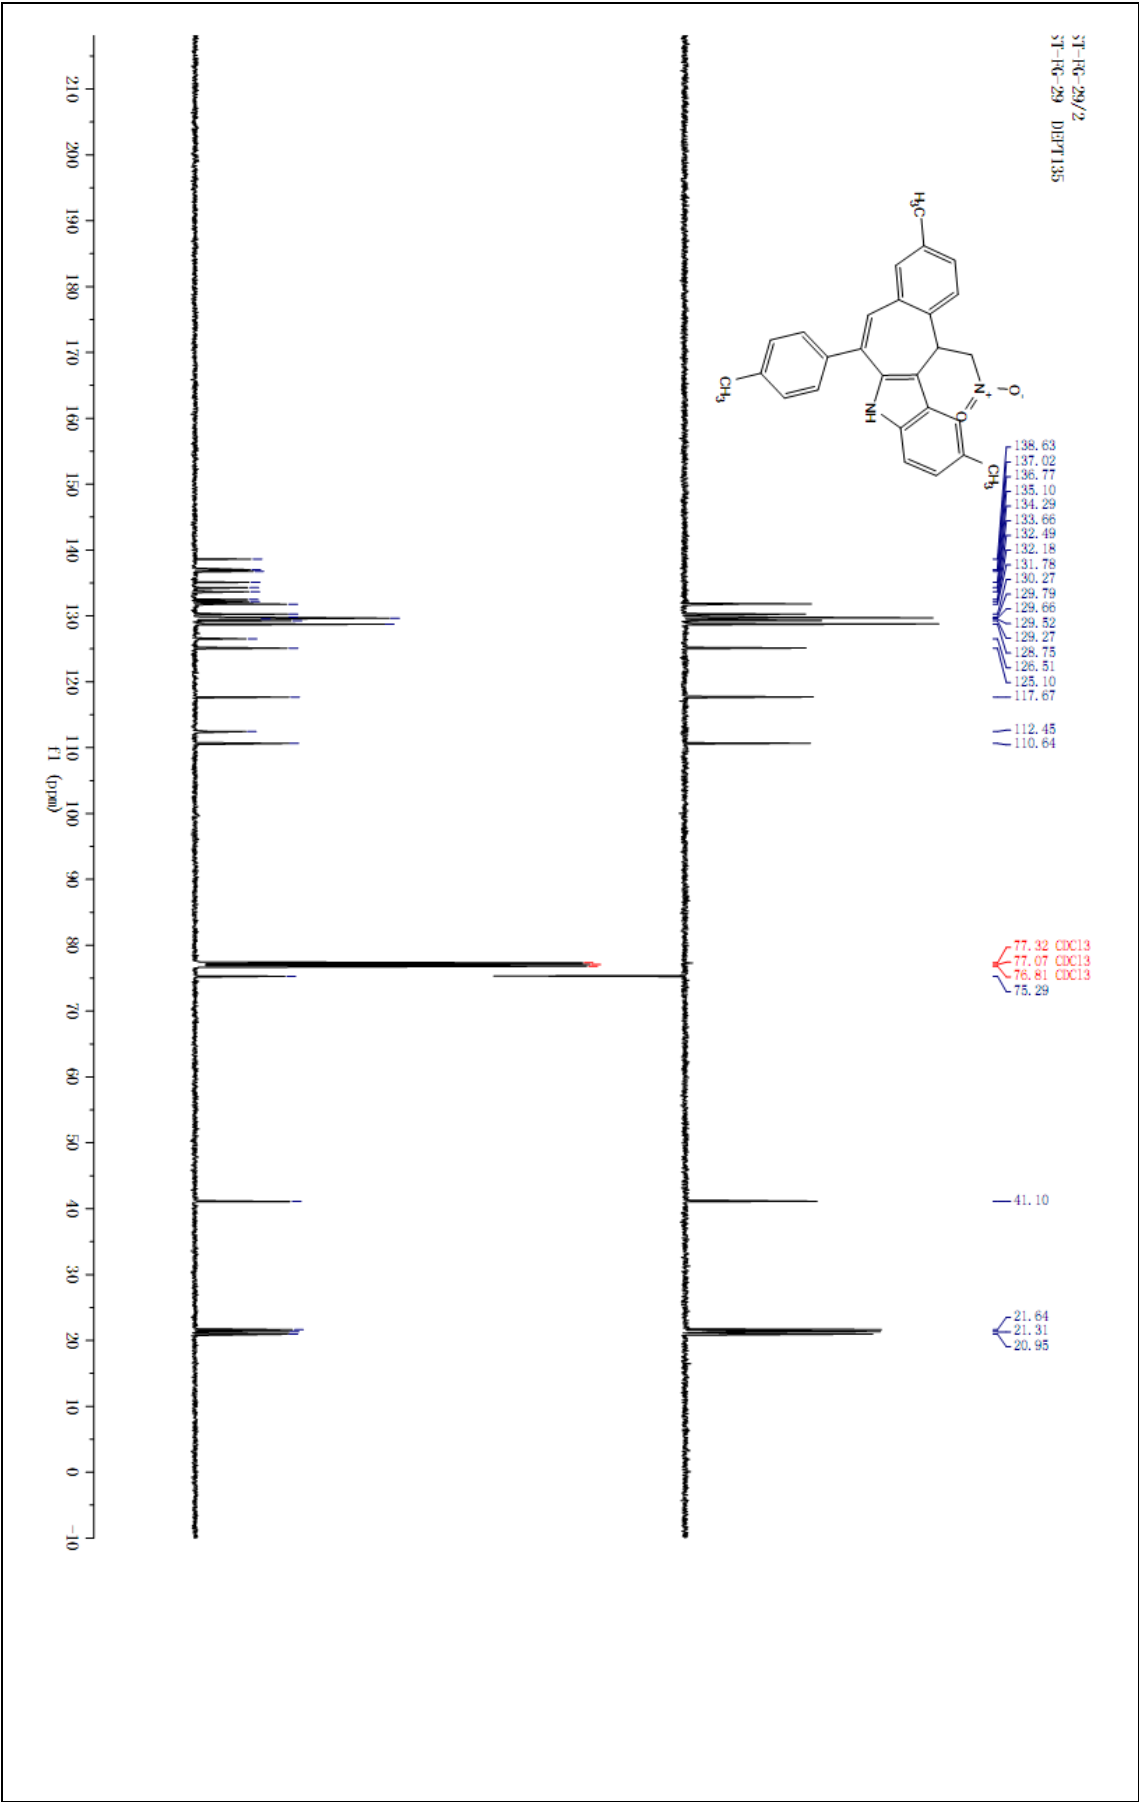

**3-Methyl-9-methyl-12-(nitromethyl)-6-(*p*-tolyl)-5,12-dihydrobenzo[4,5]  
cyclohepta[1,2-*b*] indole (3Mj)**

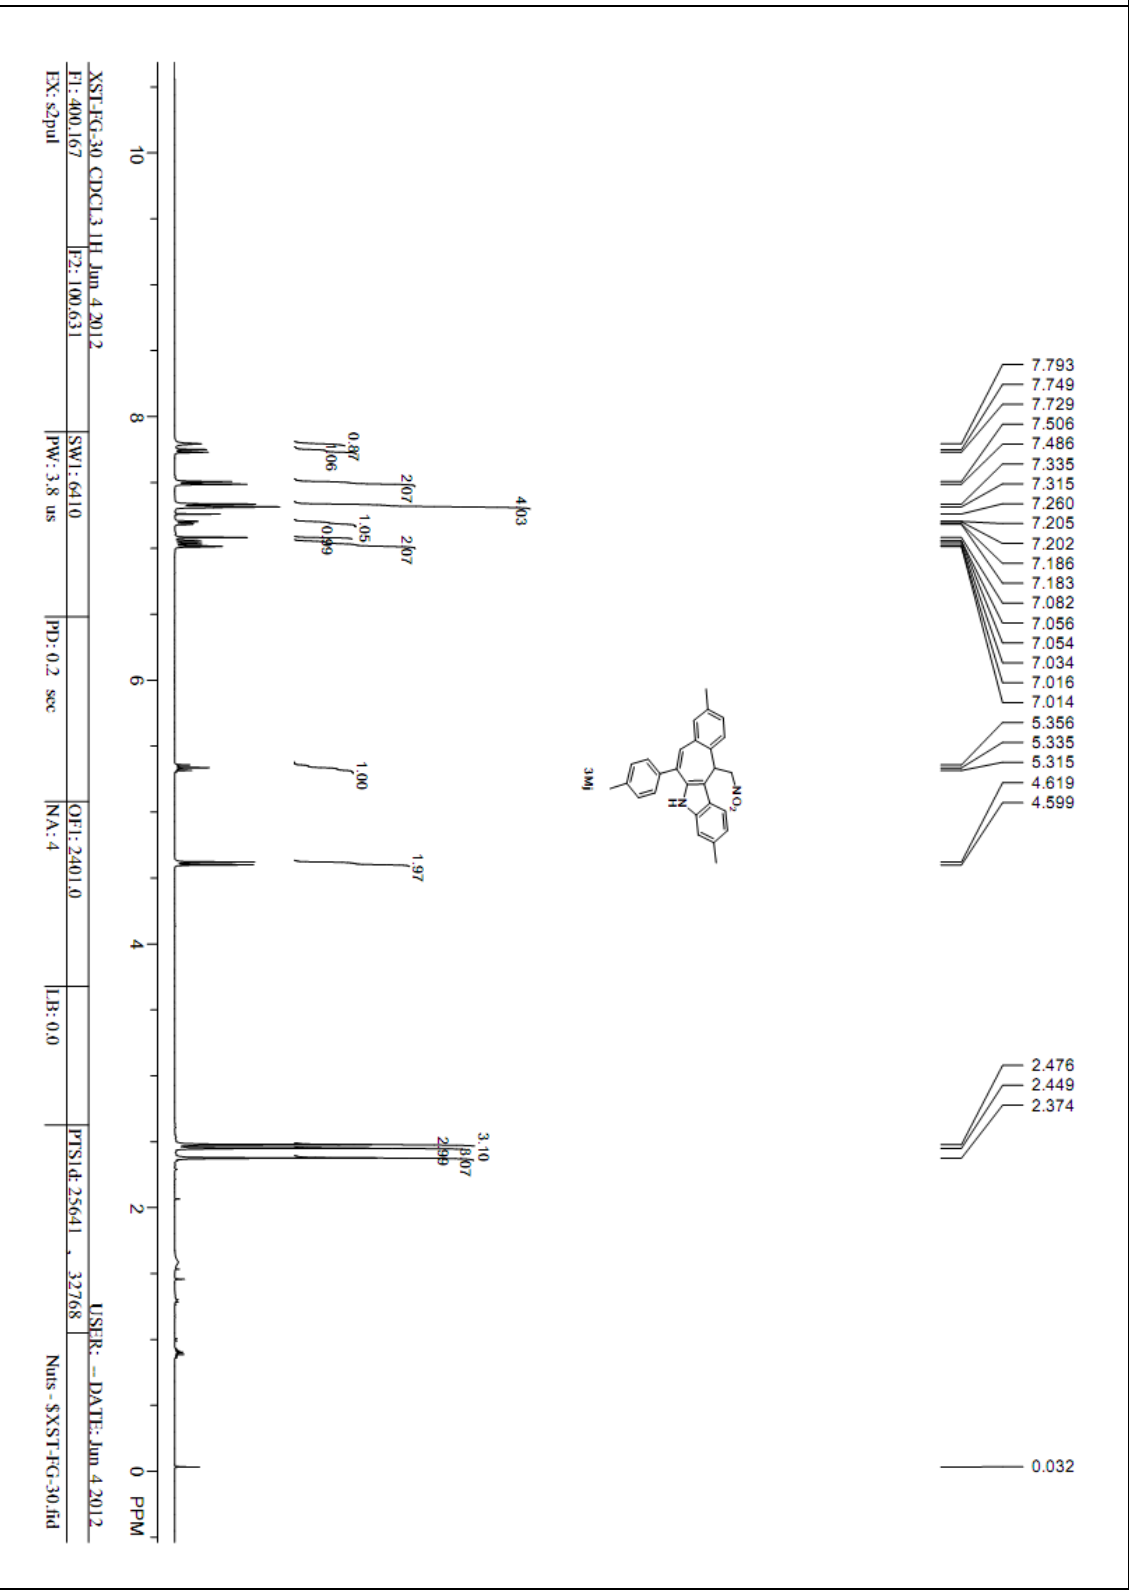

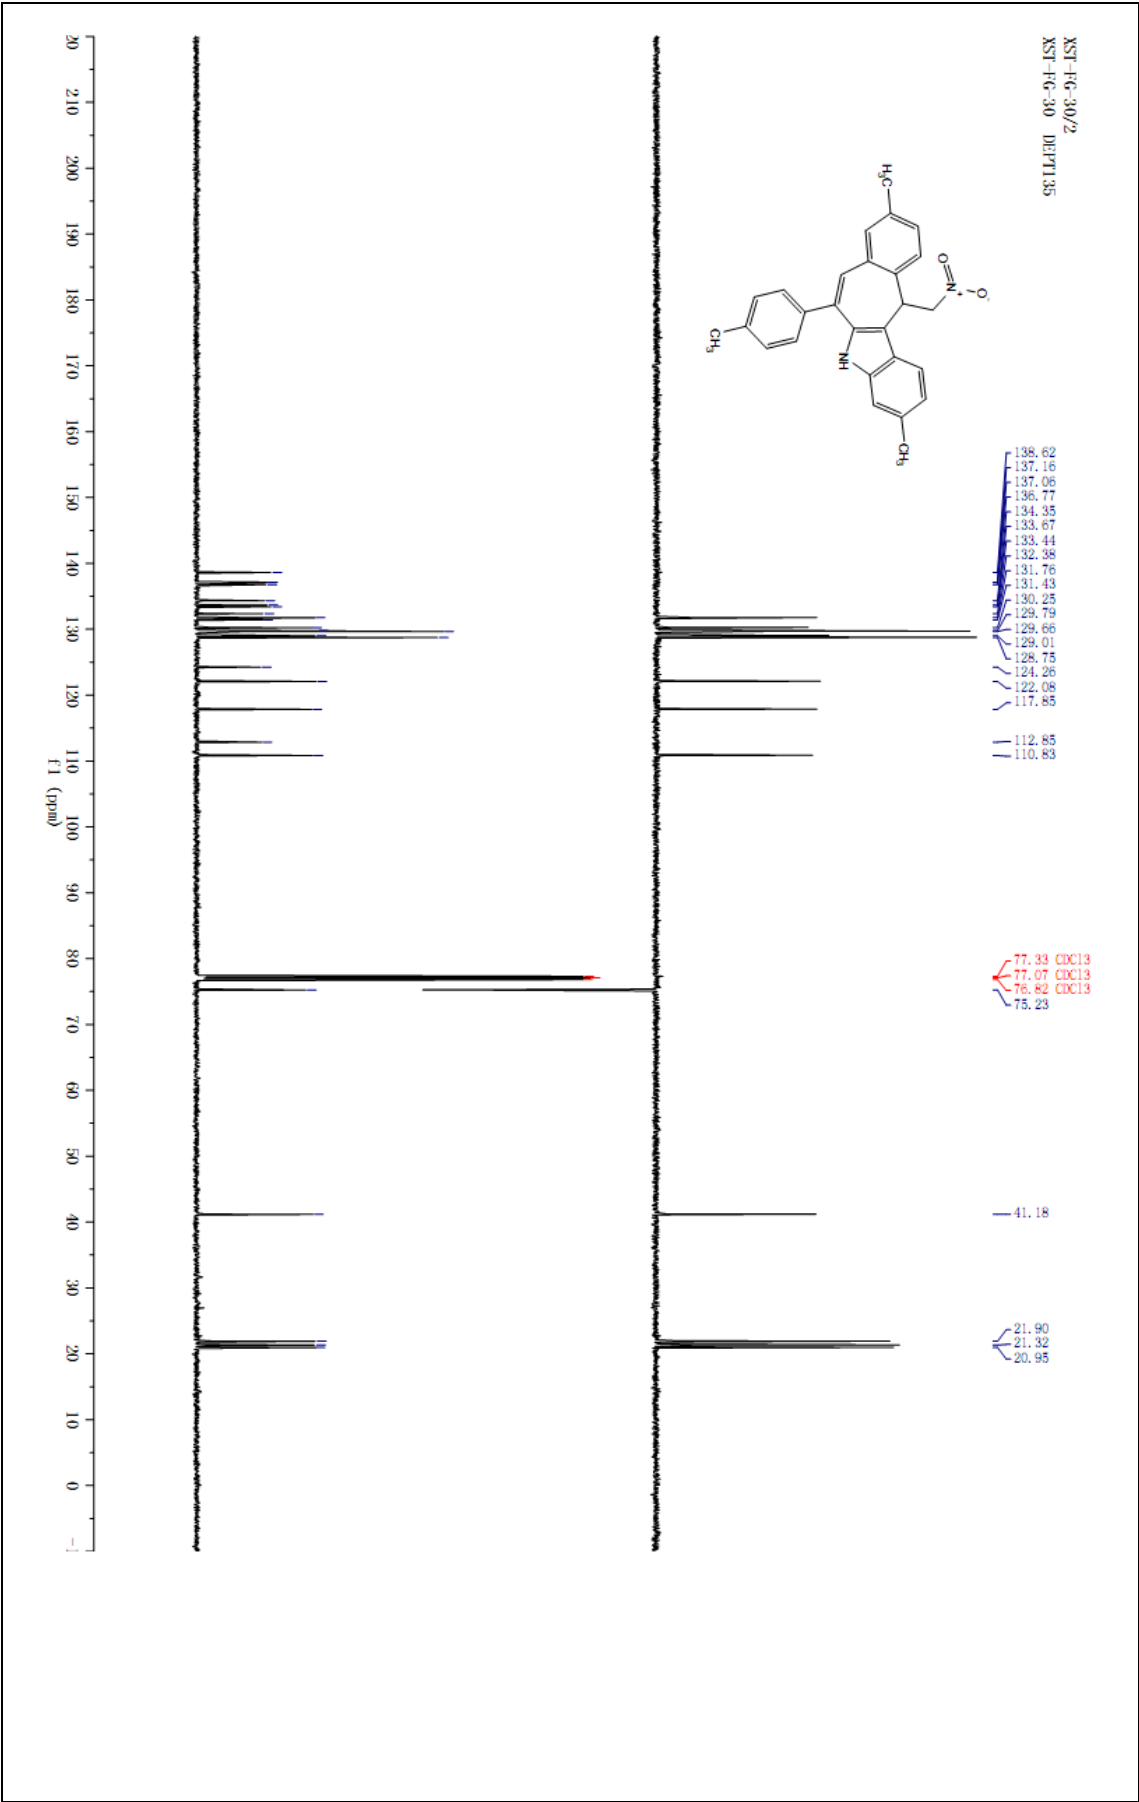



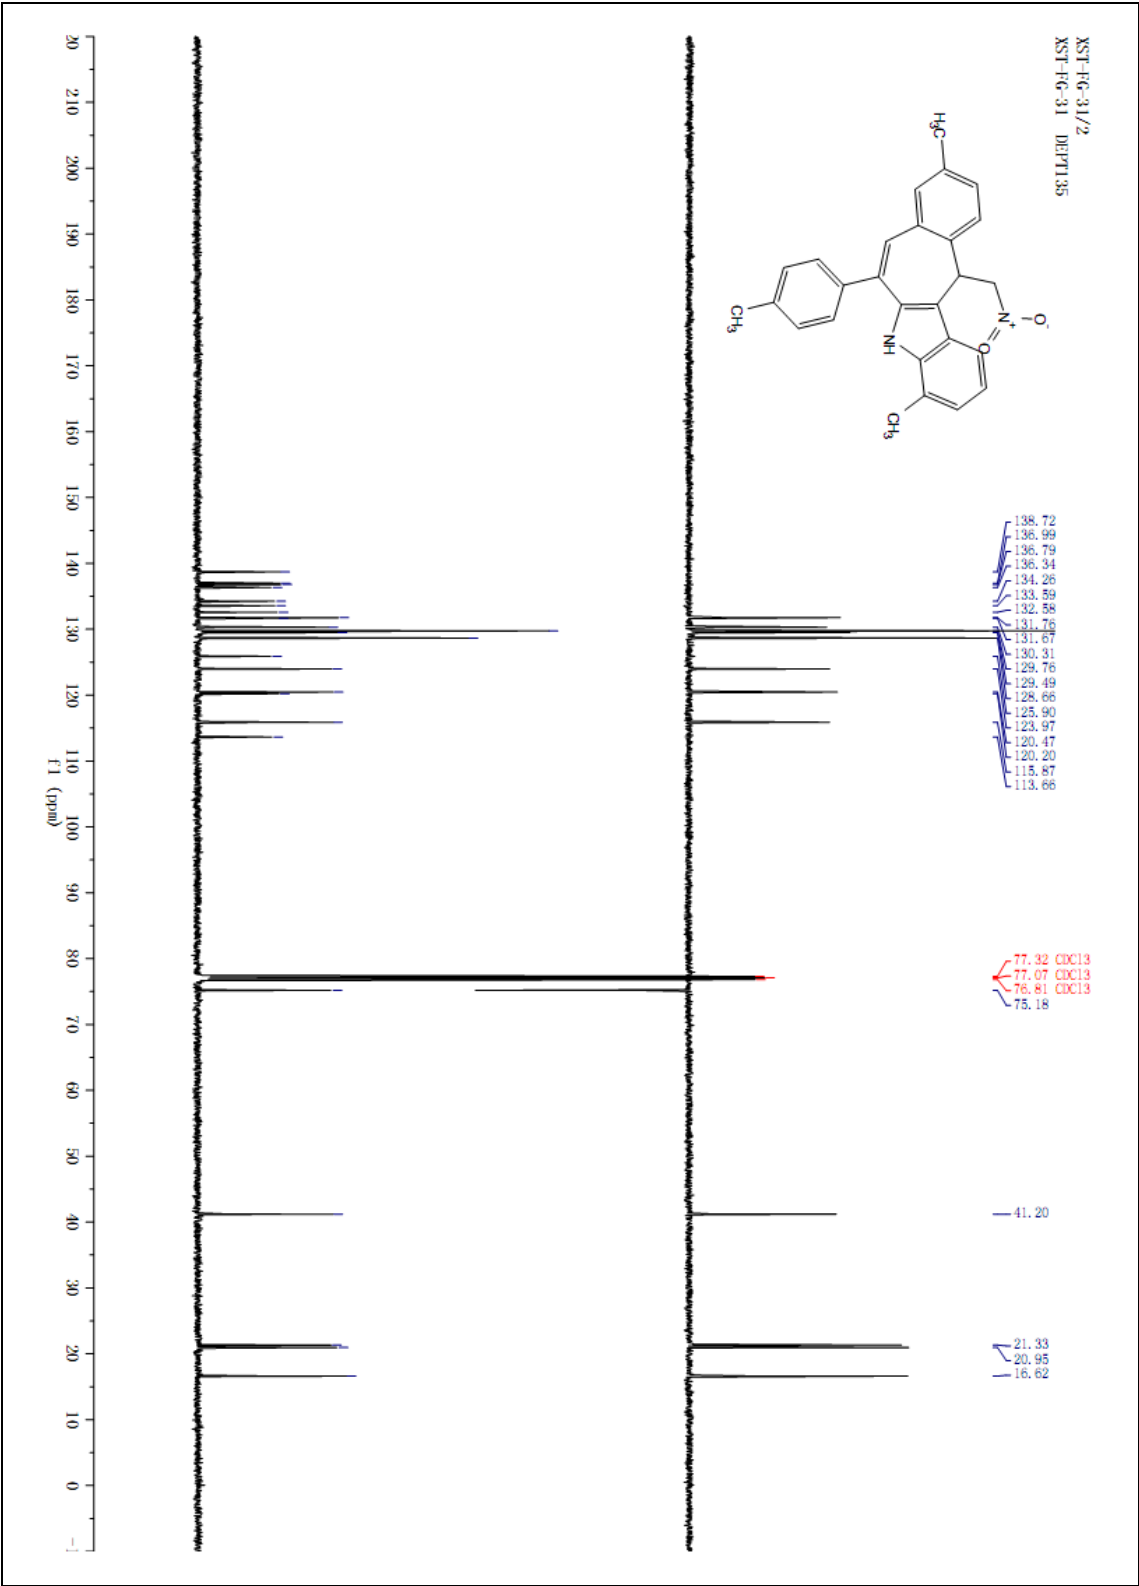

Supplement: c2gc36301a.pdf [file c2gc36301a.pdf]
